# Supplementary material for: QM/MM studies on the excited-state relaxation mechanism of a semisynthetic dTPT3 base
Source: Royal Society of Chemistry journal article supplement (doi:10.1039/c7cp08696b), 2018-01-01
Supplement: c7cp08696b1.pdf [file c7cp08696b1.pdf]

## Supporting Information: QM/MM Studies on Excited-State Relaxation Mechanism of a Semisynthetic dTPT3 Base

Wei-Wei Guo, Teng-Shuo Zhang, Wei-Hai Fang, and Ganglong Cui\*

*Key Laboratory of Theoretical and Computational Photochemistry, Ministry of Education, College of  
Chemistry, Beijing Normal University, Beijing 100875, China*

Email: [ganglong.cui@bnu.edu.cn](mailto:ganglong.cui@bnu.edu.cn)

### Contents

1. Active Orbitals in CASSCF and MS-CASPT2 Computations
2. Spin–Orbit Couplings
3. Crossing Point and Conical Intersection
4. Linearly Interpolated Cartesian Coordinate Paths
5. Vertical Excitation Energies
6. Cartesian Coordinates of All Optimized Structures and Paths

## 1. Active Orbitals in CASSCF and MS-CASPT2 Computations

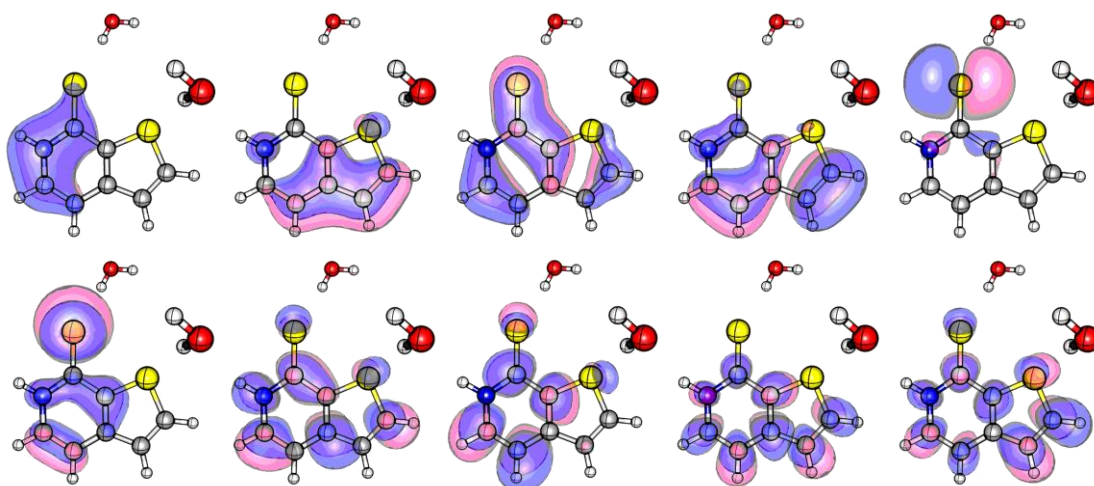

Fig. S1: Molecular orbitals used for the active space of CASSCF and MS-CASPT2 calculations.

## 2. Spin-Orbit Couplings

Spin-orbit coupling matrix elements are calculated with the atomic mean-field approximation, based on which the effective spin-orbit coupling  $\langle \Psi_I | H_{eff}^{SO} | \Psi_J \rangle$  is calculated

$$\langle \Psi_I | H_{eff}^{SO} | \Psi_J \rangle = \sqrt{\frac{(\langle \Psi_I | H_x^{SO} | \Psi_J \rangle)^2 + (\langle \Psi_I | H_y^{SO} | \Psi_J \rangle)^2 + (\langle \Psi_I | H_z^{SO} | \Psi_J \rangle)^2}{3}}$$

in which  $\Psi_I$  and  $\Psi_J$  are electronic wavefunctions of involved two electronic states and  $H_x^{SO}$ ,  $H_y^{SO}$ ,  $H_z^{SO}$  are x, y, and z components of the spin-orbit operator.

## 3. Crossing Point and Conical Intersection

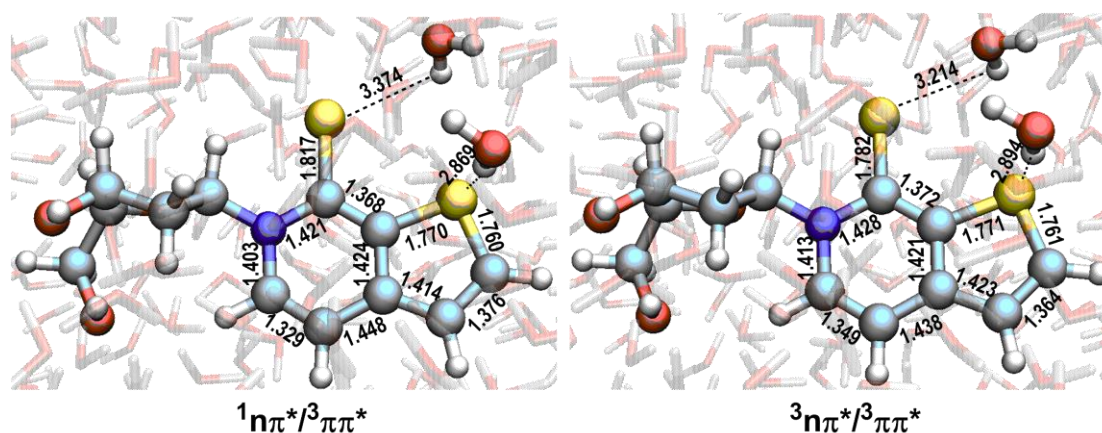

Fig. S2: Optimized structures of minimum-energy crossing point and conical intersection. Also shown are selected bond lengths (in Å) optimized at the QM(CASSCF)/MM level.

#### 4. Linearly Interpolated Cartesian Coordinate Paths

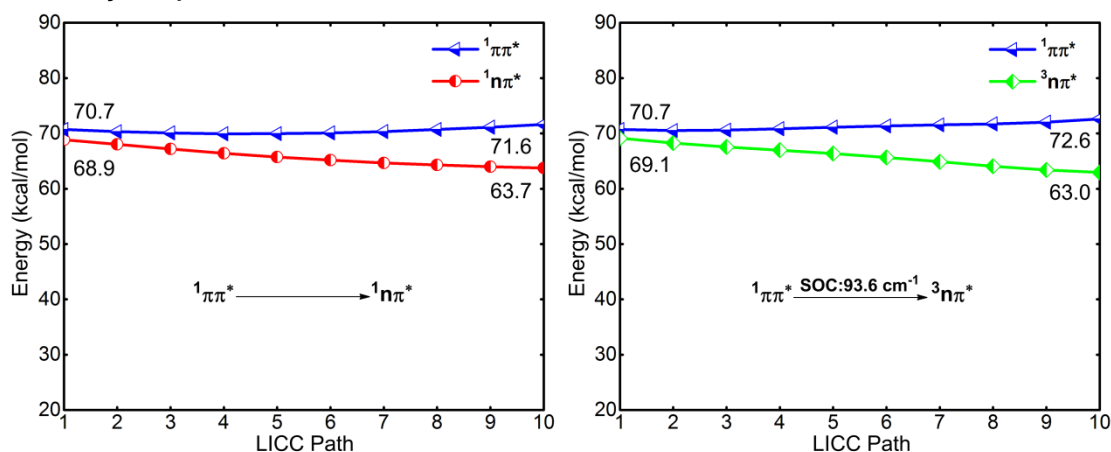

**Fig. S3:** QM(MS-CASPT2)/MM computed linearly interpolated Cartesian coordinate paths (LICCs, in kcal/mol) connecting (left) the  $S_2(1\pi\pi^*)$  and  $S_1(1n\pi^*)$  minima and (right) the  $S_2(1\pi\pi^*)$  and  $T_2(3n\pi^*)$  minima.

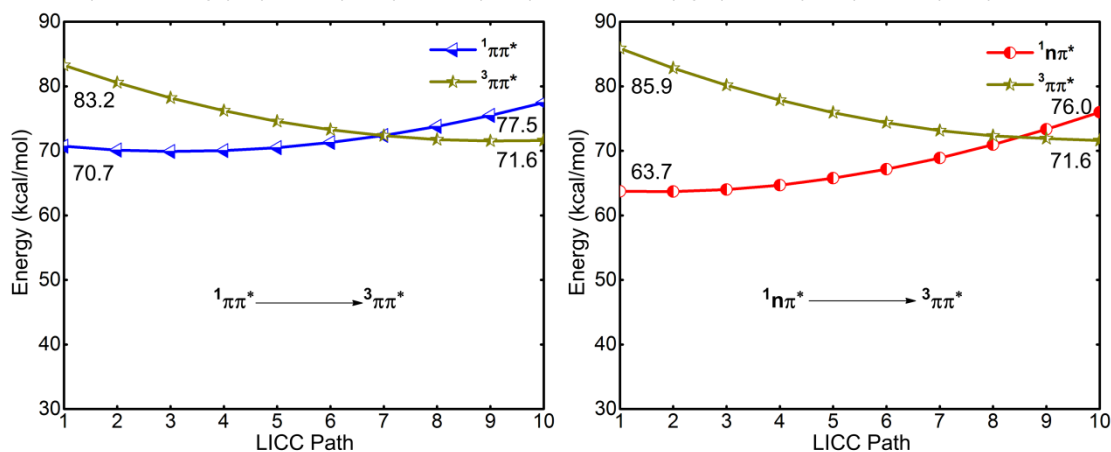

**Fig. S4:** QM(MS-CASPT2)/MM computed linearly interpolated Cartesian coordinate paths (LICCs, in kcal/mol) connecting (left) the  $S_2(1\pi\pi^*)$  and  $T_3(3\pi\pi^*)$  minimum and (right) the  $S_1(1n\pi^*)$  and  $T_3(3\pi\pi^*)$  minima.

#### 5. Vertical Excitation Energies

**Table S1:** Vertical Excitation Energies (in kcal/mol) of dTPT3 to the Lowest  $S_1(1n\pi^*)$ ,  $S_2(1\pi\pi^*)$ ,  $T_1(3\pi\pi^*)$ ,  $T_2(3n\pi^*)$ , and  $T_3(3\pi\pi^*)$  Electronic States at the Franck-Condon Point Computed by QM(MS-CASPT2)/MM. (snapshot taken from 10 ps MD, QM includes dTPT3 and 2 water molecules)

| States   | $S_1(1n\pi^*)$ | $S_2(1\pi\pi^*)$ | $T_1(3\pi\pi^*)$ | $T_2(3n\pi^*)$ | $T_3(3\pi\pi^*)$ |
|----------|----------------|------------------|------------------|----------------|------------------|
| Energies | 72.6           | 77.5             | 61.9             | 71.5           | 78.2             |

**Table S2:** Vertical Excitation Energies (in kcal/mol) of dTPT3 to the Lowest  $S_1(1n\pi^*)$ ,  $S_2(1\pi\pi^*)$ ,  $T_1(3\pi\pi^*)$ ,  $T_2(3n\pi^*)$ , and  $T_3(3\pi\pi^*)$  Electronic States at the Franck-Condon Point Computed by QM(MS-CASPT2)/MM. (snapshot taken from 1 ns MD, QM includes dTPT3 and 2 water molecules)

| States   | $S_1(1n\pi^*)$ | $S_2(1\pi\pi^*)$ | $T_1(3\pi\pi^*)$ | $T_2(3n\pi^*)$ | $T_3(3\pi\pi^*)$ |
|----------|----------------|------------------|------------------|----------------|------------------|
| Energies | 74.3           | 78.5             | 63.1             | 73.3           | 79.4             |

**Table S3:** Vertical Excitation Energies (in kcal/mol) of dTPT3 to the Lowest  $S_1(1n\pi^*)$ ,  $S_2(1\pi\pi^*)$ ,  $T_1(3\pi\pi^*)$ ,  $T_2(3n\pi^*)$ , and  $T_3(3\pi\pi^*)$  Electronic States at the Franck-Condon Point Computed by QM(MS-CASPT2)/MM.

(snapshot taken from 10 ps MD, QM includes dTPT3 and 8 water molecules)

| States   | S <sub>1</sub> (1nπ*) | S <sub>2</sub> (1ππ*) | T <sub>1</sub> (3ππ*) | T <sub>2</sub> (3nπ*) | T <sub>3</sub> (3ππ*) |
|----------|-----------------------|-----------------------|-----------------------|-----------------------|-----------------------|
| Energies | 75.0                  | 79.3                  | 62.6                  | 74.0                  | 78.7                  |

**Table S4:** Vertical Excitation Energies (in kcal/mol) of dTPT3 to the Lowest S<sub>1</sub> (1nπ\*), S<sub>2</sub> (1ππ\*), T<sub>1</sub> (3ππ\*), T<sub>2</sub> (3nπ\*), and T<sub>3</sub> (3ππ\*) Electronic States at the Franck-Condon Point Computed by QM(MS-CASPT2)/MM. (MD=10ps, QM includes dTPT3)

| States   | S <sub>1</sub> (1nπ*) | S <sub>2</sub> (1ππ*) | T <sub>1</sub> (3ππ*) | T <sub>2</sub> (3nπ*) | T <sub>3</sub> (3ππ*) |
|----------|-----------------------|-----------------------|-----------------------|-----------------------|-----------------------|
| Energies | 71.0                  | 77.6                  | 61.1                  | 69.7                  | 77.5                  |

**Table S5:** Vertical Excitation Energies (in kcal/mol) to the Lowest S<sub>1</sub> (1nπ\*), S<sub>2</sub> (1ππ\*), T<sub>1</sub> (3ππ\*), T<sub>2</sub> (3nπ\*), and T<sub>3</sub> (3ππ\*) Electronic States of (a) the dTPT3 Chromophore and (b) the dTPT3 Chromophore with the nearby sugar moiety Computed by MS-CASPT2.

| States   |   | S <sub>1</sub> (1nπ*) | S <sub>2</sub> (1ππ*) | T <sub>1</sub> (3ππ*) | T <sub>2</sub> (3nπ*) | T <sub>3</sub> (3ππ*) |
|----------|---|-----------------------|-----------------------|-----------------------|-----------------------|-----------------------|
| Energies | a | 72.2                  | 77.2                  | 61.4                  | 71.0                  | 76.1                  |
|          | b | 73.1                  | 78.2                  | 63.4                  | 72.0                  | 79.3                  |

## 6. Cartesian Coordinates of All Optimized Structures and Paths

In xyz format (unit: Ångstrom)

|                |              |              |              |
|----------------|--------------|--------------|--------------|
| S <sub>0</sub> |              |              |              |
| C              | 3.145563000  | -1.017282000 | 0.058384000  |
| C              | 3.139450000  | 0.356708000  | -0.021779000 |
| C              | 1.938702000  | 1.154406000  | -0.215838000 |
| C              | 0.782422000  | -0.986993000 | -0.234175000 |
| C              | 1.905077000  | -1.719106000 | -0.065368000 |
| C              | 4.471654000  | -1.557305000 | 0.256867000  |
| C              | 5.410507000  | -0.586601000 | 0.320078000  |
| N              | 0.777901000  | 0.396611000  | -0.270028000 |
| H              | -0.172380000 | -1.458993000 | -0.347630000 |
| H              | 1.852453000  | -2.789563000 | -0.039071000 |
| H              | 4.680108000  | -2.605327000 | 0.348939000  |
| H              | 6.464082000  | -0.711313000 | 0.464723000  |
| S              | 1.989479000  | 2.797819000  | -0.337968000 |
| S              | 4.746603000  | 1.017168000  | 0.131138000  |
| C              | -0.545674000 | 1.042047000  | -0.205315000 |
| O              | -1.352431000 | 0.687636000  | -1.335241000 |
| C              | -1.353978000 | 0.667782000  | 1.017081000  |
| H              | -0.468837000 | 2.128676000  | -0.226833000 |
| C              | -2.726721000 | 0.726103000  | -0.923906000 |
| C              | -2.730508000 | 1.043112000  | 0.563027000  |
| H              | -1.038291000 | 1.202769000  | 1.916920000  |

|                       |              |              |              |
|-----------------------|--------------|--------------|--------------|
| H                     | -1.318606000 | -0.402232000 | 1.239579000  |
| H                     | -3.209952000 | 1.546053000  | -1.459930000 |
| H                     | -2.864286000 | 2.119549000  | 0.699434000  |
| C                     | -3.416005000 | -0.574432000 | -1.329515000 |
| H                     | -4.486323000 | -0.526567000 | -1.114767000 |
| H                     | -3.284121000 | -0.757703000 | -2.399194000 |
| O                     | -2.878415000 | -1.696570000 | -0.640282000 |
| H                     | -2.841215000 | -1.449991000 | 0.299332000  |
| O                     | -3.749242000 | 0.370637000  | 1.293211000  |
| H                     | -3.542180000 | 0.495192000  | 2.234734000  |
| O                     | 3.852240000  | 5.681236000  | -1.945592000 |
| H                     | 3.391549000  | 4.865908000  | -1.794074000 |
| H                     | 4.718602000  | 5.544189000  | -1.586657000 |
| O                     | 4.769933000  | 2.214144000  | 3.641807000  |
| H                     | 4.830324000  | 2.075327000  | 2.705636000  |
| H                     | 3.995453000  | 2.747996000  | 3.762198000  |
| S <sub>i</sub> (1nπ*) |              |              |              |
| C                     | 3.168010000  | -1.042290000 | 0.103688000  |
| C                     | 3.135126000  | 0.388565000  | 0.008919000  |
| C                     | 1.982508000  | 1.093285000  | -0.186874000 |
| C                     | 0.785599000  | -1.006763000 | -0.250452000 |
| C                     | 1.918243000  | -1.722202000 | -0.065151000 |
| C                     | 4.475253000  | -1.549645000 | 0.295311000  |
| C                     | 5.440759000  | -0.575928000 | 0.351958000  |
| N                     | 0.757405000  | 0.394479000  | -0.244975000 |
| H                     | -0.159306000 | -1.487760000 | -0.400968000 |
| H                     | 1.866131000  | -2.794467000 | -0.069424000 |
| H                     | 4.699533000  | -2.594860000 | 0.388321000  |
| H                     | 6.493231000  | -0.700630000 | 0.494209000  |
| S                     | 2.016687000  | 2.860941000  | -0.371244000 |
| S                     | 4.774635000  | 1.045681000  | 0.166021000  |
| C                     | -0.545491000 | 1.062583000  | -0.145435000 |
| O                     | -1.356002000 | 0.768778000  | -1.289194000 |
| C                     | -1.355847000 | 0.643970000  | 1.059857000  |
| H                     | -0.438018000 | 2.146365000  | -0.116825000 |
| C                     | -2.729345000 | 0.776633000  | -0.873476000 |
| C                     | -2.730019000 | 1.046432000  | 0.621926000  |
| H                     | -1.035300000 | 1.136864000  | 1.981846000  |
| H                     | -1.325305000 | -0.434989000 | 1.234662000  |
| H                     | -3.225279000 | 1.605742000  | -1.383562000 |
| H                     | -2.854292000 | 2.119206000  | 0.792237000  |
| C                     | -3.403957000 | -0.520232000 | -1.315883000 |

|                                    |              |              |              |
|------------------------------------|--------------|--------------|--------------|
| H                                  | -4.475673000 | -0.487387000 | -1.105270000 |
| H                                  | -3.265736000 | -0.675123000 | -2.389169000 |
| O                                  | -2.860547000 | -1.655932000 | -0.653993000 |
| H                                  | -2.833340000 | -1.435895000 | 0.292534000  |
| O                                  | -3.753940000 | 0.359569000  | 1.330707000  |
| H                                  | -3.556521000 | 0.470104000  | 2.276088000  |
| O                                  | 3.738932000  | 5.560076000  | -1.919442000 |
| H                                  | 3.522233000  | 4.773061000  | -2.406992000 |
| H                                  | 4.630856000  | 5.434899000  | -1.624613000 |
| O                                  | 4.875584000  | 2.229662000  | 3.692186000  |
| H                                  | 4.916938000  | 1.827126000  | 2.834401000  |
| H                                  | 4.044706000  | 2.684184000  | 3.711689000  |
| S <sub>2</sub> ( <sup>1</sup> ΠΠ*) |              |              |              |
| C                                  | 3.141221000  | -1.102899000 | 0.079226000  |
| C                                  | 3.117087000  | 0.365888000  | -0.017711000 |
| C                                  | 1.972624000  | 1.063409000  | -0.190414000 |
| C                                  | 0.761152000  | -1.000704000 | -0.230371000 |
| C                                  | 1.928584000  | -1.747254000 | -0.042164000 |
| C                                  | 4.464016000  | -1.594669000 | 0.273491000  |
| C                                  | 5.402277000  | -0.607660000 | 0.324689000  |
| N                                  | 0.764092000  | 0.371463000  | -0.270608000 |
| H                                  | -0.186630000 | -1.483157000 | -0.345625000 |
| H                                  | 1.846139000  | -2.817142000 | -0.007927000 |
| H                                  | 4.705340000  | -2.635066000 | 0.373157000  |
| H                                  | 6.455612000  | -0.739690000 | 0.463629000  |
| S                                  | 1.921829000  | 2.841912000  | -0.340868000 |
| S                                  | 4.760960000  | 1.031858000  | 0.131335000  |
| C                                  | -0.551513000 | 1.034594000  | -0.199561000 |
| O                                  | -1.360926000 | 0.692345000  | -1.330905000 |
| C                                  | -1.362116000 | 0.663215000  | 1.022064000  |
| H                                  | -0.473911000 | 2.119295000  | -0.214456000 |
| C                                  | -2.734369000 | 0.731112000  | -0.918676000 |
| C                                  | -2.736609000 | 1.046493000  | 0.568478000  |
| H                                  | -1.043691000 | 1.195412000  | 1.922735000  |
| H                                  | -1.331855000 | -0.407022000 | 1.242887000  |
| H                                  | -3.217855000 | 1.551266000  | -1.454074000 |
| H                                  | -2.865151000 | 2.123513000  | 0.706674000  |
| C                                  | -3.422414000 | -0.569525000 | -1.325484000 |
| H                                  | -4.492744000 | -0.521771000 | -1.111586000 |
| H                                  | -3.289662000 | -0.752532000 | -2.395162000 |
| O                                  | -2.885376000 | -1.691974000 | -0.636374000 |
| H                                  | -2.840290000 | -1.442459000 | 0.302166000  |

|                                    |              |              |              |
|------------------------------------|--------------|--------------|--------------|
| O                                  | -3.757788000 | 0.377100000  | 1.297797000  |
| H                                  | -3.547760000 | 0.496965000  | 2.239246000  |
| O                                  | 3.847065000  | 5.683179000  | -1.940925000 |
| H                                  | 3.408607000  | 4.850621000  | -1.830882000 |
| H                                  | 4.710638000  | 5.555861000  | -1.572410000 |
| O                                  | 4.817912000  | 2.198328000  | 3.645998000  |
| H                                  | 4.890663000  | 1.982088000  | 2.724811000  |
| H                                  | 4.036436000  | 2.729113000  | 3.714868000  |
| T <sub>1</sub> ( <sup>3</sup> ππ*) |              |              |              |
| C                                  | 3.136559000  | -1.045431000 | 0.179610000  |
| C                                  | 3.100809000  | 0.395915000  | 0.001487000  |
| C                                  | 1.934976000  | 1.087828000  | -0.203328000 |
| C                                  | 0.750615000  | -1.016208000 | -0.145227000 |
| C                                  | 1.899246000  | -1.724372000 | 0.038217000  |
| C                                  | 4.451238000  | -1.535224000 | 0.372502000  |
| C                                  | 5.406823000  | -0.556467000 | 0.357314000  |
| N                                  | 0.708511000  | 0.383147000  | -0.111892000 |
| H                                  | -0.191401000 | -1.507989000 | -0.275652000 |
| H                                  | 1.852642000  | -2.797027000 | 0.057372000  |
| H                                  | 4.682816000  | -2.573366000 | 0.514926000  |
| H                                  | 6.462581000  | -0.673575000 | 0.484568000  |
| S                                  | 1.951023000  | 2.794331000  | -0.554554000 |
| S                                  | 4.740024000  | 1.058793000  | 0.085006000  |
| C                                  | -0.586961000 | 1.055185000  | 0.022140000  |
| O                                  | -1.383232000 | 0.848584000  | -1.150614000 |
| C                                  | -1.419219000 | 0.573576000  | 1.188634000  |
| H                                  | -0.459774000 | 2.132354000  | 0.129312000  |
| C                                  | -2.761850000 | 0.824235000  | -0.753351000 |
| C                                  | -2.782364000 | 1.013795000  | 0.753746000  |
| H                                  | -1.110390000 | 1.012163000  | 2.141611000  |
| H                                  | -1.400677000 | -0.513244000 | 1.305246000  |
| H                                  | -3.259232000 | 1.674706000  | -1.225892000 |
| H                                  | -2.897727000 | 2.077222000  | 0.979984000  |
| C                                  | -3.422255000 | -0.452463000 | -1.271088000 |
| H                                  | -4.496506000 | -0.436621000 | -1.072223000 |
| H                                  | -3.270593000 | -0.550217000 | -2.349178000 |
| O                                  | -2.881388000 | -1.618378000 | -0.661825000 |
| H                                  | -2.859540000 | -1.444046000 | 0.294348000  |
| O                                  | -3.823316000 | 0.299853000  | 1.408633000  |
| H                                  | -3.629658000 | 0.340299000  | 2.360260000  |
| O                                  | 3.755298000  | 5.597983000  | -1.872912000 |
| H                                  | 4.084950000  | 4.716041000  | -1.976523000 |

|                                    |              |              |              |
|------------------------------------|--------------|--------------|--------------|
| H                                  | 4.075824000  | 5.883208000  | -1.028468000 |
| O                                  | 4.943279000  | 2.289250000  | 3.619960000  |
| H                                  | 4.935550000  | 1.924303000  | 2.744622000  |
| H                                  | 4.128292000  | 2.764887000  | 3.698612000  |
| T <sub>2</sub> ( <sup>3</sup> nπ*) |              |              |              |
| C                                  | 3.156471000  | -1.046750000 | 0.153865000  |
| C                                  | 3.134334000  | 0.371931000  | 0.025260000  |
| C                                  | 1.980005000  | 1.082367000  | -0.181744000 |
| C                                  | 0.777179000  | -1.008731000 | -0.225075000 |
| C                                  | 1.906925000  | -1.728472000 | -0.038877000 |
| C                                  | 4.469536000  | -1.557346000 | 0.349476000  |
| C                                  | 5.433404000  | -0.591214000 | 0.371320000  |
| N                                  | 0.746420000  | 0.391170000  | -0.155900000 |
| H                                  | -0.168150000 | -1.483811000 | -0.389513000 |
| H                                  | 1.857175000  | -2.800640000 | -0.063653000 |
| H                                  | 4.692161000  | -2.600921000 | 0.464933000  |
| H                                  | 6.486637000  | -0.715908000 | 0.508755000  |
| S                                  | 2.012389000  | 2.825155000  | -0.525371000 |
| S                                  | 4.772619000  | 1.027245000  | 0.148301000  |
| C                                  | -0.542797000 | 1.068818000  | 0.007986000  |
| O                                  | -1.363435000 | 0.877362000  | -1.150781000 |
| C                                  | -1.352963000 | 0.571578000  | 1.182665000  |
| H                                  | -0.409444000 | 2.144937000  | 0.125324000  |
| C                                  | -2.734362000 | 0.856813000  | -0.726662000 |
| C                                  | -2.722951000 | 1.022533000  | 0.783396000  |
| H                                  | -1.022834000 | 0.991710000  | 2.136559000  |
| H                                  | -1.335667000 | -0.517425000 | 1.277874000  |
| H                                  | -3.234149000 | 1.718559000  | -1.175409000 |
| H                                  | -2.830215000 | 2.082332000  | 1.029488000  |
| C                                  | -3.416889000 | -0.405708000 | -1.250804000 |
| H                                  | -4.485944000 | -0.386671000 | -1.024774000 |
| H                                  | -3.293410000 | -0.484603000 | -2.334032000 |
| O                                  | -2.868886000 | -1.586135000 | -0.676934000 |
| H                                  | -2.825603000 | -1.431037000 | 0.281765000  |
| O                                  | -3.751334000 | 0.300610000  | 1.448845000  |
| H                                  | -3.530161000 | 0.315301000  | 2.395298000  |
| O                                  | 3.680747000  | 5.540776000  | -1.749229000 |
| H                                  | 3.565457000  | 4.896719000  | -2.434574000 |
| H                                  | 4.600388000  | 5.510892000  | -1.524142000 |
| O                                  | 4.894056000  | 2.244604000  | 3.705794000  |
| H                                  | 4.942331000  | 1.885598000  | 2.829392000  |
| H                                  | 4.063591000  | 2.699164000  | 3.740387000  |



T<sub>3</sub>(<sup>3</sup>ππ\*)

|   |              |              |              |
|---|--------------|--------------|--------------|
| C | 3.169551000  | -1.043074000 | 0.062706000  |
| C | 3.160334000  | 0.342746000  | -0.018246000 |
| C | 1.927992000  | 1.122911000  | -0.212200000 |
| C | 0.748004000  | -0.971834000 | -0.236676000 |
| C | 1.954734000  | -1.750376000 | -0.049776000 |
| C | 4.505029000  | -1.564287000 | 0.261463000  |
| C | 5.439074000  | -0.587613000 | 0.323076000  |
| N | 0.772076000  | 0.385471000  | -0.271884000 |
| H | -0.201523000 | -1.448892000 | -0.348774000 |
| H | 1.892959000  | -2.818335000 | -0.015601000 |
| H | 4.725482000  | -2.609681000 | 0.356426000  |
| H | 6.493489000  | -0.705310000 | 0.465882000  |
| S | 1.983567000  | 2.818080000  | -0.340589000 |
| S | 4.764655000  | 1.014831000  | 0.135823000  |
| C | -0.545684000 | 1.047995000  | -0.203482000 |
| O | -1.357066000 | 0.708988000  | -1.335983000 |
| C | -1.357752000 | 0.678684000  | 1.018974000  |
| H | -0.460332000 | 2.134041000  | -0.219387000 |
| C | -2.730696000 | 0.737439000  | -0.921973000 |
| C | -2.734360000 | 1.053373000  | 0.564742000  |
| H | -1.042142000 | 1.215372000  | 1.917918000  |
| H | -1.324224000 | -0.390133000 | 1.245955000  |
| H | -3.220526000 | 1.554217000  | -1.456740000 |
| H | -2.869088000 | 2.129446000  | 0.702734000  |
| C | -3.413025000 | -0.566927000 | -1.328699000 |
| H | -4.483663000 | -0.524429000 | -1.114800000 |
| H | -3.279981000 | -0.749261000 | -2.398401000 |
| O | -2.872029000 | -1.687514000 | -0.639816000 |
| H | -2.841905000 | -1.443981000 | 0.300818000  |
| O | -3.752050000 | 0.378337000  | 1.294044000  |
| H | -3.541850000 | 0.497135000  | 2.235598000  |
| O | 3.848674000  | 5.683332000  | -1.944371000 |
| H | 3.392877000  | 4.862869000  | -1.816333000 |
| H | 4.712110000  | 5.545635000  | -1.579576000 |
| O | 4.793069000  | 2.211304000  | 3.656855000  |
| H | 4.857548000  | 2.043092000  | 2.725969000  |
| H | 4.013669000  | 2.739415000  | 3.761519000  |

<sup>1</sup>ππ\*/<sup>3</sup>ππ\*

|   |             |              |              |
|---|-------------|--------------|--------------|
| C | 3.210278000 | -0.806598000 | 0.153924000  |
| C | 3.070894000 | 0.596091000  | -0.047913000 |
| C | 1.855670000 | 1.203640000  | -0.205448000 |

|   |              |              |              |
|---|--------------|--------------|--------------|
| C | 0.826085000  | -0.967823000 | -0.048052000 |
| C | 1.992513000  | -1.588244000 | 0.095858000  |
| C | 4.557995000  | -1.211175000 | 0.293731000  |
| C | 5.456988000  | -0.173488000 | 0.206722000  |
| N | 0.675406000  | 0.426718000  | -0.055263000 |
| H | -0.088465000 | -1.520735000 | -0.134430000 |
| H | 2.022714000  | -2.659775000 | 0.143311000  |
| H | 4.858769000  | -2.229416000 | 0.453182000  |
| H | 6.523090000  | -0.215699000 | 0.285763000  |
| S | 1.727553000  | 2.983659000  | -0.546101000 |
| S | 4.660299000  | 1.374107000  | -0.051639000 |
| C | -0.653112000 | 1.021080000  | 0.095129000  |
| O | -1.438853000 | 0.794298000  | -1.078719000 |
| C | -1.457654000 | 0.477932000  | 1.253529000  |
| H | -0.582895000 | 2.100734000  | 0.221778000  |
| C | -2.814926000 | 0.725898000  | -0.678074000 |
| C | -2.835607000 | 0.883459000  | 0.833480000  |
| H | -1.159129000 | 0.900743000  | 2.216755000  |
| H | -1.403308000 | -0.610232000 | 1.339261000  |
| H | -3.336140000 | 1.572745000  | -1.130687000 |
| H | -2.982157000 | 1.937809000  | 1.082795000  |
| C | -3.439566000 | -0.557779000 | -1.220035000 |
| H | -4.512460000 | -0.579281000 | -1.014341000 |
| H | -3.292142000 | -0.626271000 | -2.301069000 |
| O | -2.857024000 | -1.719215000 | -0.640824000 |
| H | -2.837059000 | -1.567123000 | 0.319242000  |
| O | -3.850222000 | 0.124667000  | 1.478374000  |
| H | -3.650727000 | 0.149011000  | 2.429408000  |
| O | 4.143232000  | 5.085254000  | -1.376010000 |
| H | 4.303127000  | 4.504646000  | -2.108160000 |
| H | 4.847661000  | 4.916429000  | -0.764338000 |
| O | 4.949071000  | 1.927731000  | 3.709254000  |
| H | 4.922894000  | 1.723046000  | 2.783659000  |
| H | 4.136824000  | 2.382982000  | 3.884173000  |

${}^3\pi\pi^*/{}^3\pi\pi\pi^*$

|   |             |              |              |
|---|-------------|--------------|--------------|
| C | 3.221740000 | -0.808990000 | 0.204430000  |
| C | 3.113421000 | 0.587094000  | -0.038355000 |
| C | 1.906813000 | 1.211761000  | -0.226081000 |
| C | 0.830162000 | -0.938956000 | -0.027452000 |
| C | 2.007273000 | -1.576937000 | 0.139797000  |
| C | 4.569815000 | -1.241635000 | 0.349764000  |
| C | 5.480716000 | -0.233284000 | 0.232963000  |

|   |              |              |              |
|---|--------------|--------------|--------------|
| N | 0.705520000  | 0.468764000  | -0.013726000 |
| H | -0.091794000 | -1.475311000 | -0.126363000 |
| H | 2.028600000  | -2.649344000 | 0.181429000  |
| H | 4.847698000  | -2.262269000 | 0.531686000  |
| H | 6.545793000  | -0.296667000 | 0.311845000  |
| S | 1.766319000  | 2.947419000  | -0.604695000 |
| S | 4.722332000  | 1.327494000  | -0.068464000 |
| C | -0.608287000 | 1.089436000  | 0.159376000  |
| O | -1.398754000 | 0.918012000  | -1.021238000 |
| C | -1.423850000 | 0.530180000  | 1.302531000  |
| H | -0.511207000 | 2.162202000  | 0.322662000  |
| C | -2.775156000 | 0.845536000  | -0.623356000 |
| C | -2.795919000 | 0.964284000  | 0.891388000  |
| H | -1.121529000 | 0.926898000  | 2.275858000  |
| H | -1.383630000 | -0.560095000 | 1.364226000  |
| H | -3.291707000 | 1.705832000  | -1.055573000 |
| H | -2.930720000 | 2.013612000  | 1.167662000  |
| C | -3.405352000 | -0.421058000 | -1.198545000 |
| H | -4.478987000 | -0.441126000 | -0.996703000 |
| H | -3.254967000 | -0.463751000 | -2.280472000 |
| O | -2.832308000 | -1.600333000 | -0.646499000 |
| H | -2.812528000 | -1.471213000 | 0.316828000  |
| O | -3.820590000 | 0.200772000  | 1.514288000  |
| H | -3.622924000 | 0.198681000  | 2.466089000  |
| O | 4.047072000  | 4.798968000  | -1.092271000 |
| H | 4.295291000  | 4.425815000  | -1.928017000 |
| H | 4.834616000  | 4.784013000  | -0.562816000 |
| O | 4.914974000  | 2.011749000  | 3.697272000  |
| H | 4.934318000  | 1.745086000  | 2.787228000  |
| H | 4.064827000  | 2.413207000  | 3.816626000  |

**FC point to S<sub>2</sub>(<sup>1</sup>ππ\*) minimum**

coord\_1

|   |              |              |              |
|---|--------------|--------------|--------------|
| C | 3.145563900  | -1.017282300 | 0.058384000  |
| C | 3.139450900  | 0.356708100  | -0.021779000 |
| C | 1.938702500  | 1.154406300  | -0.215838100 |
| C | 0.782422200  | -0.986993300 | -0.234175100 |
| C | 1.905077500  | -1.719106500 | -0.065368000 |
| C | 4.471655300  | -1.557305400 | 0.256867100  |
| C | 5.410508500  | -0.586601200 | 0.320078100  |
| N | 0.777901200  | 0.396611100  | -0.270028100 |
| H | -0.172380000 | -1.458993400 | -0.347630100 |
| H | 1.852453500  | -2.789563800 | -0.039071000 |

|         |              |              |              |
|---------|--------------|--------------|--------------|
| H       | 4.680109300  | -2.605327700 | 0.348939100  |
| H       | 6.464083800  | -0.711313200 | 0.464723100  |
| S       | 1.989479600  | 2.797819800  | -0.337968100 |
| S       | 4.746604300  | 1.017168300  | 0.131138000  |
| C       | -0.545674200 | 1.042047300  | -0.205315100 |
| O       | -1.352431400 | 0.687636200  | -1.335241400 |
| C       | -1.353978400 | 0.667782200  | 1.017081300  |
| H       | -0.468837100 | 2.128676600  | -0.226833100 |
| C       | -2.726721800 | 0.726103200  | -0.923906300 |
| C       | -2.730508800 | 1.043112300  | 0.563027200  |
| H       | -1.038291300 | 1.202769300  | 1.916920500  |
| H       | -1.318606400 | -0.402232100 | 1.239579300  |
| H       | -3.209952900 | 1.546053400  | -1.459930400 |
| H       | -2.864286800 | 2.119549600  | 0.699434200  |
| C       | -3.416006000 | -0.574432200 | -1.329515400 |
| H       | -4.486324300 | -0.526567100 | -1.114767300 |
| H       | -3.284121900 | -0.757703200 | -2.399194700 |
| O       | -2.878415800 | -1.696570500 | -0.640282200 |
| H       | -2.841215800 | -1.449991400 | 0.299332100  |
| O       | -3.749243000 | 0.370637100  | 1.293211400  |
| H       | -3.542181000 | 0.495192100  | 2.234734600  |
| O       | 3.852241100  | 5.681237600  | -1.945592500 |
| H       | 3.391549900  | 4.865909400  | -1.794074500 |
| H       | 4.718603300  | 5.544190600  | -1.586657400 |
| O       | 4.769934300  | 2.214144600  | 3.641808000  |
| H       | 4.830325400  | 2.075327600  | 2.705636800  |
| H       | 3.995454100  | 2.747996800  | 3.762199100  |
| coord_2 |              |              |              |
| C       | 3.145078700  | -1.026781700 | 0.060690500  |
| C       | 3.136963100  | 0.357741600  | -0.021337300 |
| C       | 1.942468600  | 1.144308800  | -0.213024000 |
| C       | 0.780056100  | -0.988503700 | -0.233761900 |
| C       | 1.907686800  | -1.722220700 | -0.062798700 |
| C       | 4.470803900  | -1.561443000 | 0.258705300  |
| C       | 5.409591200  | -0.588926900 | 0.320580900  |
| N       | 0.776363900  | 0.393829900  | -0.270102900 |
| H       | -0.173966000 | -1.461665500 | -0.347416500 |
| H       | 1.851749500  | -2.792614800 | -0.035618700 |
| H       | 4.682910400  | -2.608618000 | 0.351621800  |
| H       | 6.463139900  | -0.714451800 | 0.464592100  |
| S       | 1.981959500  | 2.802732100  | -0.338302400 |
| S       | 4.748196500  | 1.018814400  | 0.131149200  |

|         |              |              |              |
|---------|--------------|--------------|--------------|
| C       | -0.546326000 | 1.041232000  | -0.204686600 |
| O       | -1.353378200 | 0.688171300  | -1.334770300 |
| C       | -1.354885700 | 0.667288300  | 1.017624300  |
| H       | -0.469404100 | 2.127647100  | -0.225469500 |
| C       | -2.727574500 | 0.726671700  | -0.923335900 |
| C       | -2.731189700 | 1.043501000  | 0.563621800  |
| H       | -1.038894500 | 1.201966100  | 1.917555600  |
| H       | -1.320081400 | -0.402750600 | 1.239937000  |
| H       | -3.210834100 | 1.546644200  | -1.459291100 |
| H       | -2.864386200 | 2.120003100  | 0.700226900  |
| C       | -3.416720800 | -0.573875300 | -1.329077400 |
| H       | -4.487040500 | -0.526022700 | -1.114423800 |
| H       | -3.284740300 | -0.757117800 | -2.398756400 |
| O       | -2.879191900 | -1.696047700 | -0.639857100 |
| H       | -2.841115700 | -1.449141700 | 0.299637700  |
| O       | -3.750195600 | 0.371368600  | 1.293710300  |
| H       | -3.542804100 | 0.495403200  | 2.235225300  |
| O       | 3.851662300  | 5.681465800  | -1.945088000 |
| H       | 3.393441700  | 4.864223100  | -1.798177700 |
| H       | 4.717714700  | 5.545500100  | -1.585088300 |
| O       | 4.775262000  | 2.212403600  | 3.642262100  |
| H       | 4.837026400  | 2.064983400  | 2.707755900  |
| H       | 4.000004300  | 2.745914900  | 3.756928200  |
| coord_3 |              |              |              |
| C       | 3.144593500  | -1.036281100 | 0.062997000  |
| C       | 3.134475400  | 0.358775200  | -0.020895700 |
| C       | 1.946234600  | 1.134211200  | -0.210210000 |
| C       | 0.777690100  | -0.990014100 | -0.233348600 |
| C       | 1.910296000  | -1.725334900 | -0.060229400 |
| C       | 4.469952600  | -1.565580600 | 0.260543500  |
| C       | 5.408674000  | -0.591252700 | 0.321083600  |
| N       | 0.774826600  | 0.391048600  | -0.270177800 |
| H       | -0.175552000 | -1.464337600 | -0.347202800 |
| H       | 1.851045500  | -2.795665800 | -0.032166400 |
| H       | 4.685711400  | -2.611908300 | 0.354304500  |
| H       | 6.462196000  | -0.717590400 | 0.464461100  |
| S       | 1.974439500  | 2.807644500  | -0.338636700 |
| S       | 4.749788600  | 1.020460500  | 0.131160300  |
| C       | -0.546977800 | 1.040416700  | -0.204058200 |
| O       | -1.354325100 | 0.688706500  | -1.334299200 |
| C       | -1.355792900 | 0.666794400  | 1.018167200  |
| H       | -0.469971200 | 2.126617600  | -0.224106000 |

|         |              |              |              |
|---------|--------------|--------------|--------------|
| C       | -2.728427300 | 0.727240300  | -0.922765600 |
| C       | -2.731870700 | 1.043889700  | 0.564216500  |
| H       | -1.039497600 | 1.201162900  | 1.918190700  |
| H       | -1.321556400 | -0.403269100 | 1.240294600  |
| H       | -3.211715300 | 1.547234900  | -1.458651800 |
| H       | -2.864485600 | 2.120456700  | 0.701019600  |
| C       | -3.417435700 | -0.573318500 | -1.328639400 |
| H       | -4.487756700 | -0.525478200 | -1.114080400 |
| H       | -3.285358700 | -0.756532400 | -2.398318200 |
| O       | -2.879967900 | -1.695524800 | -0.639431900 |
| H       | -2.841015600 | -1.448292000 | 0.299943300  |
| O       | -3.751148200 | 0.372100100  | 1.294209300  |
| H       | -3.543427100 | 0.495614300  | 2.235716000  |
| O       | 3.851083600  | 5.681694000  | -1.944583500 |
| H       | 3.395333400  | 4.862536900  | -1.802281000 |
| H       | 4.716826100  | 5.546809700  | -1.583519200 |
| O       | 4.780589600  | 2.210662700  | 3.642716300  |
| H       | 4.843727400  | 2.054639300  | 2.709875100  |
| H       | 4.004554500  | 2.743833100  | 3.751657400  |
| coord_4 |              |              |              |
| C       | 3.144108300  | -1.045780500 | 0.065303400  |
| C       | 3.131987600  | 0.359808700  | -0.020454000 |
| C       | 1.950000700  | 1.124113700  | -0.207396000 |
| C       | 0.775324000  | -0.991524600 | -0.232935400 |
| C       | 1.912905300  | -1.728449200 | -0.057660000 |
| C       | 4.469101200  | -1.569718300 | 0.262381700  |
| C       | 5.407756700  | -0.593578400 | 0.321586400  |
| N       | 0.773289300  | 0.388267400  | -0.270252600 |
| H       | -0.177138000 | -1.467009700 | -0.346989200 |
| H       | 1.850341500  | -2.798716800 | -0.028714100 |
| H       | 4.688512500  | -2.615198600 | 0.356987200  |
| H       | 6.461252000  | -0.720729000 | 0.464330100  |
| S       | 1.966919500  | 2.812556800  | -0.338971100 |
| S       | 4.751380800  | 1.022106600  | 0.131171500  |
| C       | -0.547629700 | 1.039601400  | -0.203429800 |
| O       | -1.355272000 | 0.689241600  | -1.333828200 |
| C       | -1.356700200 | 0.666300500  | 1.018710200  |
| H       | -0.470538200 | 2.125588100  | -0.222742400 |
| C       | -2.729280100 | 0.727808800  | -0.922195300 |
| C       | -2.732551700 | 1.044278400  | 0.564811100  |
| H       | -1.040100800 | 1.200359700  | 1.918825700  |
| H       | -1.323031400 | -0.403787600 | 1.240652200  |

|         |              |              |              |
|---------|--------------|--------------|--------------|
| H       | -3.212596500 | 1.547825700  | -1.458012500 |
| H       | -2.864584900 | 2.120910200  | 0.701812300  |
| C       | -3.418150600 | -0.572761700 | -1.328201400 |
| H       | -4.488473000 | -0.524933800 | -1.113736900 |
| H       | -3.285977000 | -0.755946900 | -2.397880000 |
| O       | -2.880744000 | -1.695002000 | -0.639006800 |
| H       | -2.840915500 | -1.447442300 | 0.300248900  |
| O       | -3.752100800 | 0.372831500  | 1.294708300  |
| H       | -3.544050200 | 0.495825300  | 2.236206700  |
| O       | 3.850504900  | 5.681922200  | -1.944078900 |
| H       | 3.397225100  | 4.860850600  | -1.806384200 |
| H       | 4.715937500  | 5.548119300  | -1.581950100 |
| O       | 4.785917200  | 2.208921700  | 3.643170400  |
| H       | 4.850428400  | 2.044295100  | 2.711994200  |
| H       | 4.009104700  | 2.741751300  | 3.746386500  |
| coord_5 |              |              |              |
| C       | 3.143623100  | -1.055279900 | 0.067609900  |
| C       | 3.129499900  | 0.360842200  | -0.020012300 |
| C       | 1.953766700  | 1.114016100  | -0.204581900 |
| C       | 0.772957900  | -0.993035000 | -0.232522200 |
| C       | 1.915514600  | -1.731563400 | -0.055090700 |
| C       | 4.468249900  | -1.573855900 | 0.264219900  |
| C       | 5.406839400  | -0.595904200 | 0.322089100  |
| N       | 0.771752000  | 0.385486200  | -0.270327500 |
| H       | -0.178724000 | -1.469681800 | -0.346775600 |
| H       | 1.849637400  | -2.801767800 | -0.025261800 |
| H       | 4.691313500  | -2.618488800 | 0.359669900  |
| H       | 6.460308100  | -0.723867600 | 0.464199100  |
| S       | 1.959399500  | 2.817469200  | -0.339305400 |
| S       | 4.752972900  | 1.023752800  | 0.131182600  |
| C       | -0.548281500 | 1.038786200  | -0.202801400 |
| O       | -1.356218800 | 0.689776700  | -1.333357100 |
| C       | -1.357607500 | 0.665806600  | 1.019253200  |
| H       | -0.471105200 | 2.124558600  | -0.221378900 |
| C       | -2.730132900 | 0.728377400  | -0.921624900 |
| C       | -2.733232700 | 1.044667000  | 0.565405800  |
| H       | -1.040703900 | 1.199556500  | 1.919460800  |
| H       | -1.324506400 | -0.404306100 | 1.241009800  |
| H       | -3.213477800 | 1.548416500  | -1.457373200 |
| H       | -2.864684300 | 2.121363800  | 0.702604900  |
| C       | -3.418865500 | -0.572204900 | -1.327763400 |
| H       | -4.489189200 | -0.524389300 | -1.113393400 |

|         |              |              |              |
|---------|--------------|--------------|--------------|
| H       | -3.286595400 | -0.755361500 | -2.397441700 |
| O       | -2.881520100 | -1.694479200 | -0.638581700 |
| H       | -2.840815500 | -1.446592600 | 0.300554600  |
| O       | -3.753053300 | 0.373563000  | 1.295207300  |
| H       | -3.544673300 | 0.496036400  | 2.236697400  |
| O       | 3.849926100  | 5.682150400  | -1.943574400 |
| H       | 3.399116800  | 4.859164400  | -1.810487400 |
| H       | 4.715048800  | 5.549428900  | -1.580381000 |
| O       | 4.791244800  | 2.207180700  | 3.643624500  |
| H       | 4.857129400  | 2.033950900  | 2.714113400  |
| H       | 4.013654900  | 2.739669500  | 3.741115700  |
| coord_6 |              |              |              |
| C       | 3.143138000  | -1.064779300 | 0.069916400  |
| C       | 3.127012200  | 0.361875800  | -0.019570600 |
| C       | 1.957532700  | 1.103918600  | -0.201767900 |
| C       | 0.770591800  | -0.994545400 | -0.232109000 |
| C       | 1.918123800  | -1.734677600 | -0.052521400 |
| C       | 4.467398600  | -1.577993500 | 0.266058100  |
| C       | 5.405922200  | -0.598229900 | 0.322591900  |
| N       | 0.770214800  | 0.382704900  | -0.270402400 |
| H       | -0.180310000 | -1.472353900 | -0.346562000 |
| H       | 1.848933400  | -2.804818700 | -0.021809500 |
| H       | 4.694114600  | -2.621779100 | 0.362352700  |
| H       | 6.459364200  | -0.727006200 | 0.464068100  |
| S       | 1.951879500  | 2.822381500  | -0.339639700 |
| S       | 4.754565100  | 1.025398900  | 0.131193800  |
| C       | -0.548933400 | 1.037970900  | -0.202173000 |
| O       | -1.357165700 | 0.690311900  | -1.332886000 |
| C       | -1.358514700 | 0.665312700  | 1.019796200  |
| H       | -0.471672200 | 2.123529100  | -0.220015300 |
| C       | -2.730985600 | 0.728945900  | -0.921054600 |
| C       | -2.733913700 | 1.045055700  | 0.566000500  |
| H       | -1.041307100 | 1.198753300  | 1.920095800  |
| H       | -1.325981400 | -0.404824700 | 1.241367400  |
| H       | -3.214359000 | 1.549007200  | -1.456733900 |
| H       | -2.864783700 | 2.121817300  | 0.703397600  |
| C       | -3.419580400 | -0.571648100 | -1.327325400 |
| H       | -4.489905400 | -0.523844800 | -1.113049900 |
| H       | -3.287213800 | -0.754776100 | -2.397003500 |
| O       | -2.882296100 | -1.693956400 | -0.638156600 |
| H       | -2.840715400 | -1.445742900 | 0.300860200  |
| O       | -3.754005900 | 0.374294500  | 1.295706300  |



|         |              |              |              |
|---------|--------------|--------------|--------------|
| H       | -3.545296300 | 0.496247400  | 2.237188100  |
| O       | 3.849347400  | 5.682378600  | -1.943069800 |
| H       | 3.401008600  | 4.857478200  | -1.814590600 |
| H       | 4.714160200  | 5.550738500  | -1.578811900 |
| O       | 4.796572400  | 2.205439800  | 3.644078600  |
| H       | 4.863830400  | 2.023606800  | 2.716232600  |
| H       | 4.018205100  | 2.737587600  | 3.735844900  |
| coord_7 |              |              |              |
| C       | 3.142652800  | -1.074278700 | 0.072222900  |
| C       | 3.124524400  | 0.362909300  | -0.019129000 |
| C       | 1.961298800  | 1.093821000  | -0.198953800 |
| C       | 0.768225700  | -0.996055900 | -0.231695800 |
| C       | 1.920733100  | -1.737791800 | -0.049952000 |
| C       | 4.466547200  | -1.582131100 | 0.267896300  |
| C       | 5.405004900  | -0.600555700 | 0.323094700  |
| N       | 0.768677500  | 0.379923700  | -0.270477200 |
| H       | -0.181896000 | -1.475026000 | -0.346348300 |
| H       | 1.848229400  | -2.807869700 | -0.018357200 |
| H       | 4.696915600  | -2.625069400 | 0.365035400  |
| H       | 6.458420300  | -0.730144800 | 0.463937100  |
| S       | 1.944359500  | 2.827293900  | -0.339974000 |
| S       | 4.756157200  | 1.027045000  | 0.131205000  |
| C       | -0.549585200 | 1.037155600  | -0.201544600 |
| O       | -1.358112600 | 0.690847000  | -1.332415000 |
| C       | -1.359422000 | 0.664818800  | 1.020339200  |
| H       | -0.472239200 | 2.122499600  | -0.218651800 |
| C       | -2.731838400 | 0.729514400  | -0.920484300 |
| C       | -2.734594700 | 1.045444400  | 0.566595100  |
| H       | -1.041910300 | 1.197950100  | 1.920730900  |
| H       | -1.327456400 | -0.405343200 | 1.241725000  |
| H       | -3.215240200 | 1.549598000  | -1.456094600 |
| H       | -2.864883100 | 2.122270800  | 0.704190300  |
| C       | -3.420295300 | -0.571091300 | -1.326887400 |
| H       | -4.490621700 | -0.523300400 | -1.112706500 |
| H       | -3.287832200 | -0.754190700 | -2.396565300 |
| O       | -2.883072200 | -1.693433500 | -0.637731400 |
| H       | -2.840615300 | -1.444893200 | 0.301165800  |
| O       | -3.754958500 | 0.375026000  | 1.296205300  |
| H       | -3.545919400 | 0.496458500  | 2.237678700  |
| O       | 3.848768600  | 5.682606800  | -1.942565300 |
| H       | 3.402900300  | 4.855791900  | -1.818693900 |
| H       | 4.713271600  | 5.552048100  | -1.577242800 |

|         |              |              |              |
|---------|--------------|--------------|--------------|
| O       | 4.801900100  | 2.203698800  | 3.644532700  |
| H       | 4.870531500  | 2.013262600  | 2.718351700  |
| H       | 4.022755300  | 2.735505800  | 3.730574000  |
| coord_8 |              |              |              |
| C       | 3.142167600  | -1.083778100 | 0.074529400  |
| C       | 3.122036700  | 0.363942800  | -0.018687300 |
| C       | 1.965064800  | 1.083723500  | -0.196139800 |
| C       | 0.765859700  | -0.997566300 | -0.231282600 |
| C       | 1.923342300  | -1.740906100 | -0.047382700 |
| C       | 4.465695900  | -1.586268700 | 0.269734500  |
| C       | 5.404087600  | -0.602881400 | 0.323597400  |
| N       | 0.767140200  | 0.377142500  | -0.270552100 |
| H       | -0.183482000 | -1.477698100 | -0.346134700 |
| H       | 1.847525400  | -2.810920700 | -0.014904900 |
| H       | 4.699716700  | -2.628359700 | 0.367718100  |
| H       | 6.457476400  | -0.733283400 | 0.463806100  |
| S       | 1.936839400  | 2.832206200  | -0.340308300 |
| S       | 4.757749300  | 1.028691100  | 0.131216100  |
| C       | -0.550237100 | 1.036340300  | -0.200916200 |
| O       | -1.359059400 | 0.691382100  | -1.331943900 |
| C       | -1.360329300 | 0.664325000  | 1.020882100  |
| H       | -0.472806200 | 2.121470100  | -0.217288200 |
| C       | -2.732691200 | 0.730083000  | -0.919914000 |
| C       | -2.735275600 | 1.045833100  | 0.567189800  |
| H       | -1.042513400 | 1.197146900  | 1.921366000  |
| H       | -1.328931400 | -0.405861700 | 1.242082700  |
| H       | -3.216121400 | 1.550188700  | -1.455455300 |
| H       | -2.864982500 | 2.122724400  | 0.704983000  |
| C       | -3.421010200 | -0.570534500 | -1.326449400 |
| H       | -4.491337900 | -0.522755900 | -1.112363000 |
| H       | -3.288450600 | -0.753605300 | -2.396127000 |
| O       | -2.883848300 | -1.692910700 | -0.637306300 |
| H       | -2.840515200 | -1.444043500 | 0.301471400  |
| O       | -3.755911000 | 0.375757500  | 1.296704300  |
| H       | -3.546542400 | 0.496669600  | 2.238169400  |
| O       | 3.848189900  | 5.682835000  | -1.942060800 |
| H       | 3.404792000  | 4.854105700  | -1.822797100 |
| H       | 4.712383000  | 5.553357700  | -1.575673700 |
| O       | 4.807227700  | 2.201957800  | 3.644986800  |
| H       | 4.877232500  | 2.002918400  | 2.720470900  |
| H       | 4.027305500  | 2.733424000  | 3.725303200  |
| coord_9 |              |              |              |

|   |              |              |              |
|---|--------------|--------------|--------------|
| C | 3.141682400  | -1.093277500 | 0.076835800  |
| C | 3.119548900  | 0.364976400  | -0.018245600 |
| C | 1.968830900  | 1.073626000  | -0.193325800 |
| C | 0.763493600  | -0.999076700 | -0.230869400 |
| C | 1.925951600  | -1.744020300 | -0.044813400 |
| C | 4.464844600  | -1.590406300 | 0.271572700  |
| C | 5.403170400  | -0.605207200 | 0.324100200  |
| N | 0.765602900  | 0.374361200  | -0.270626900 |
| H | -0.185068000 | -1.480370200 | -0.345921100 |
| H | 1.846821300  | -2.813971700 | -0.011452600 |
| H | 4.702517700  | -2.631649900 | 0.370400800  |
| H | 6.456532400  | -0.736422000 | 0.463675200  |
| S | 1.929319400  | 2.837118500  | -0.340642700 |
| S | 4.759341500  | 1.030337300  | 0.131227300  |
| C | -0.550888900 | 1.035525000  | -0.200287800 |
| O | -1.360006300 | 0.691917300  | -1.331472800 |
| C | -1.361236600 | 0.663831100  | 1.021425100  |
| H | -0.473373200 | 2.120440600  | -0.215924700 |
| C | -2.733543900 | 0.730651500  | -0.919343600 |
| C | -2.735956600 | 1.046221800  | 0.567784500  |
| H | -1.043116600 | 1.196343600  | 1.922001000  |
| H | -1.330406400 | -0.406380200 | 1.242440300  |
| H | -3.217002600 | 1.550779500  | -1.454816100 |
| H | -2.865081800 | 2.123177900  | 0.705775700  |
| C | -3.421725000 | -0.569977700 | -1.326011500 |
| H | -4.492054100 | -0.522211500 | -1.112019500 |
| H | -3.289068900 | -0.753019800 | -2.395688800 |
| O | -2.884624300 | -1.692387900 | -0.636881200 |
| H | -2.840415100 | -1.443193700 | 0.301777000  |
| O | -3.756863600 | 0.376488900  | 1.297203200  |
| H | -3.547165500 | 0.496880600  | 2.238660100  |
| O | 3.847611200  | 5.683063200  | -1.941556200 |
| H | 3.406683700  | 4.852419400  | -1.826900300 |
| H | 4.711494300  | 5.554667300  | -1.574104600 |
| O | 4.812555300  | 2.200216800  | 3.645441000  |
| H | 4.883933500  | 1.992574300  | 2.722590000  |
| H | 4.031855700  | 2.731342200  | 3.720032400  |

coord\_10

|   |             |              |              |
|---|-------------|--------------|--------------|
| C | 3.141197200 | -1.102776800 | 0.079142300  |
| C | 3.117061200 | 0.366009900  | -0.017804000 |
| C | 1.972596900 | 1.063528400  | -0.190511700 |
| C | 0.761127500 | -1.000587100 | -0.230456200 |

|   |              |              |              |
|---|--------------|--------------|--------------|
| C | 1.928560800  | -1.747134500 | -0.042244100 |
| C | 4.463993200  | -1.594543900 | 0.273410900  |
| C | 5.402253100  | -0.607533000 | 0.324603000  |
| N | 0.764065600  | 0.371580000  | -0.270701800 |
| H | -0.186654000 | -1.483042300 | -0.345707500 |
| H | 1.846117300  | -2.817022700 | -0.008000300 |
| H | 4.705318800  | -2.634940200 | 0.373083500  |
| H | 6.455588500  | -0.739560600 | 0.463544200  |
| S | 1.921799400  | 2.842030900  | -0.340977000 |
| S | 4.760933600  | 1.031983400  | 0.131238400  |
| C | -0.551540800 | 1.034709800  | -0.199659300 |
| O | -1.360953100 | 0.692452400  | -1.331001800 |
| C | -1.362143800 | 0.663337200  | 1.021968100  |
| H | -0.473940300 | 2.119411100  | -0.214561100 |
| C | -2.734396700 | 0.731220100  | -0.918773300 |
| C | -2.736637600 | 1.046610500  | 0.568379100  |
| H | -1.043719800 | 1.195540400  | 1.922636100  |
| H | -1.331881400 | -0.406898700 | 1.242797900  |
| H | -3.217883800 | 1.551370200  | -1.454176800 |
| H | -2.865181200 | 2.123631500  | 0.706568400  |
| C | -3.422439900 | -0.569420800 | -1.325573500 |
| H | -4.492770400 | -0.521667000 | -1.111676000 |
| H | -3.289687300 | -0.752434400 | -2.395250600 |
| O | -2.885400400 | -1.691865100 | -0.636456100 |
| H | -2.840315000 | -1.442344000 | 0.302082700  |
| O | -3.757816200 | 0.377220400  | 1.297702200  |
| H | -3.547788600 | 0.497091700  | 2.239150800  |
| O | 3.847032400  | 5.683291400  | -1.941051700 |
| H | 3.408575400  | 4.850733200  | -1.831003500 |
| H | 4.710605700  | 5.555976900  | -1.572535500 |
| O | 4.817882900  | 2.198475900  | 3.645895100  |
| H | 4.890634500  | 1.982230100  | 2.724709200  |
| H | 4.036405900  | 2.729260300  | 3.714761500  |

**S<sub>2</sub>(<sup>1</sup>ππ\*) minimum to S<sub>1</sub>(<sup>1</sup>nπ\*) minimum**

coord\_1

|   |             |              |              |
|---|-------------|--------------|--------------|
| C | 3.141197200 | -1.102776800 | 0.079142300  |
| C | 3.117061200 | 0.366009900  | -0.017804000 |
| C | 1.972596900 | 1.063528400  | -0.190511700 |
| C | 0.761127500 | -1.000587100 | -0.230456200 |
| C | 1.928560800 | -1.747134500 | -0.042244100 |
| C | 4.463993200 | -1.594543900 | 0.273410900  |
| C | 5.402253100 | -0.607533000 | 0.324603000  |

|   |              |              |              |
|---|--------------|--------------|--------------|
| N | 0.764065600  | 0.371580000  | -0.270701800 |
| H | -0.186654000 | -1.483042300 | -0.345707500 |
| H | 1.846117300  | -2.817022700 | -0.008000300 |
| H | 4.705318800  | -2.634940200 | 0.373083500  |
| H | 6.455588500  | -0.739560600 | 0.463544200  |
| S | 1.921799400  | 2.842030900  | -0.340977000 |
| S | 4.760933600  | 1.031983400  | 0.131238400  |
| C | -0.551540800 | 1.034709800  | -0.199659300 |
| O | -1.360953100 | 0.692452400  | -1.331001800 |
| C | -1.362143800 | 0.663337200  | 1.021968100  |
| H | -0.473940300 | 2.119411100  | -0.214561100 |
| C | -2.734396700 | 0.731220100  | -0.918773300 |
| C | -2.736637600 | 1.046610500  | 0.568379100  |
| H | -1.043719800 | 1.195540400  | 1.922636100  |
| H | -1.331881400 | -0.406898700 | 1.242797900  |
| H | -3.217883800 | 1.551370200  | -1.454176800 |
| H | -2.865181200 | 2.123631500  | 0.706568400  |
| C | -3.422439900 | -0.569420800 | -1.325573500 |
| H | -4.492770400 | -0.521667000 | -1.111676000 |
| H | -3.289687300 | -0.752434400 | -2.395250600 |
| O | -2.885400400 | -1.691865100 | -0.636456100 |
| H | -2.840315000 | -1.442344000 | 0.302082700  |
| O | -3.757816200 | 0.377220400  | 1.297702200  |
| H | -3.547788600 | 0.497091700  | 2.239150800  |
| O | 3.847032400  | 5.683291400  | -1.941051700 |
| H | 3.408575400  | 4.850733200  | -1.831003500 |
| H | 4.710605700  | 5.555976900  | -1.572535500 |
| O | 4.817882900  | 2.198475900  | 3.645895100  |
| H | 4.890634500  | 1.982230100  | 2.724709200  |
| H | 4.036405900  | 2.729260300  | 3.714761500  |

coord\_2

|   |              |              |              |
|---|--------------|--------------|--------------|
| C | 3.144121000  | -1.096223000 | 0.081898000  |
| C | 3.119019000  | 0.368349000  | -0.014807000 |
| C | 1.973652000  | 1.066673000  | -0.190081000 |
| C | 0.763791000  | -1.001430000 | -0.232650000 |
| C | 1.927355000  | -1.744526000 | -0.044761000 |
| C | 4.465186000  | -1.589728000 | 0.275873000  |
| C | 5.406478000  | -0.604198000 | 0.327671000  |
| N | 0.763276000  | 0.373968000  | -0.267816000 |
| H | -0.183673000 | -1.483719000 | -0.351819000 |
| H | 1.848277000  | -2.814678000 | -0.014796000 |
| H | 4.704613000  | -2.630660000 | 0.374806000  |

|   |              |              |              |
|---|--------------|--------------|--------------|
| H | 6.459717000  | -0.735416000 | 0.466980000  |
| S | 1.932304000  | 2.843970000  | -0.344314000 |
| S | 4.762410000  | 1.033332000  | 0.135130000  |
| C | -0.550915000 | 1.037657000  | -0.193608000 |
| O | -1.360451000 | 0.700786000  | -1.326331000 |
| C | -1.361493000 | 0.661040000  | 1.026205000  |
| H | -0.469990000 | 2.122256000  | -0.203676000 |
| C | -2.733883000 | 0.736125000  | -0.913714000 |
| C | -2.735949000 | 1.046451000  | 0.574355000  |
| H | -1.042831000 | 1.188875000  | 1.929242000  |
| H | -1.331204000 | -0.410166000 | 1.241921000  |
| H | -3.218749000 | 1.557273000  | -1.446306000 |
| H | -2.864013000 | 2.123001000  | 0.716112000  |
| C | -3.420440000 | -0.564094000 | -1.324470000 |
| H | -4.490924000 | -0.517991000 | -1.110938000 |
| H | -3.287080000 | -0.743984000 | -2.394548000 |
| O | -2.882698000 | -1.688013000 | -0.638377000 |
| H | -2.839598000 | -1.441767000 | 0.301049000  |
| O | -3.757436000 | 0.375125000  | 1.301396000  |
| H | -3.548808000 | 0.493958000  | 2.243281000  |
| O | 3.834996000  | 5.669430000  | -1.938626000 |
| H | 3.411732000  | 4.823047000  | -1.893981000 |
| H | 4.701719000  | 5.542349000  | -1.578297000 |
| O | 4.824252000  | 2.201769000  | 3.651065000  |
| H | 4.893514000  | 1.964824000  | 2.736925000  |
| H | 4.037288000  | 2.724084000  | 3.714447000  |

coord\_3

|   |              |              |              |
|---|--------------|--------------|--------------|
| C | 3.147019000  | -1.089546000 | 0.084570000  |
| C | 3.120950000  | 0.370811000  | -0.011904000 |
| C | 1.974679000  | 1.069937000  | -0.189748000 |
| C | 0.766429000  | -1.002155000 | -0.234929000 |
| C | 1.926126000  | -1.741797000 | -0.047357000 |
| C | 4.466355000  | -1.584786000 | 0.278255000  |
| C | 5.410677000  | -0.600736000 | 0.330653000  |
| N | 0.762460000  | 0.376474000  | -0.265025000 |
| H | -0.180717000 | -1.484281000 | -0.358013000 |
| H | 1.850415000  | -2.812213000 | -0.021665000 |
| H | 4.703885000  | -2.626254000 | 0.376455000  |
| H | 6.463819000  | -0.731143000 | 0.470331000  |
| S | 1.942779000  | 2.846027000  | -0.347761000 |
| S | 4.763858000  | 1.034805000  | 0.138926000  |
| C | -0.550317000 | 1.040720000  | -0.187655000 |

|         |              |              |              |
|---------|--------------|--------------|--------------|
| O       | -1.359975000 | 0.709227000  | -1.321756000 |
| C       | -1.360869000 | 0.658864000  | 1.030345000  |
| H       | -0.466070000 | 2.125216000  | -0.192896000 |
| C       | -2.733397000 | 0.741139000  | -0.908752000 |
| C       | -2.735288000 | 1.046409000  | 0.580232000  |
| H       | -1.041970000 | 1.182337000  | 1.935748000  |
| H       | -1.330553000 | -0.413309000 | 1.240955000  |
| H       | -3.219643000 | 1.563279000  | -1.438537000 |
| H       | -2.862875000 | 2.122489000  | 0.725551000  |
| C       | -3.418465000 | -0.558662000 | -1.323456000 |
| H       | -4.489103000 | -0.514211000 | -1.110289000 |
| H       | -3.284497000 | -0.735435000 | -2.393934000 |
| O       | -2.880018000 | -1.684051000 | -0.640380000 |
| H       | -2.838905000 | -1.441075000 | 0.299933000  |
| O       | -3.757082000 | 0.373149000  | 1.304994000  |
| H       | -3.549856000 | 0.490951000  | 2.247316000  |
| O       | 3.822925000  | 5.655680000  | -1.936326000 |
| H       | 3.417831000  | 4.799614000  | -1.960002000 |
| H       | 4.693155000  | 5.528783000  | -1.584038000 |
| O       | 4.830591000  | 2.205210000  | 3.656131000  |
| H       | 4.896363000  | 1.947560000  | 2.749038000  |
| H       | 4.038140000  | 2.719053000  | 3.714024000  |
| coord_4 |              |              |              |
| C       | 0.769068000  | -1.002881000 | -0.237207000 |
| C       | 1.924897000  | -1.739068000 | -0.049954000 |
| C       | 4.467524000  | -1.579844000 | 0.280637000  |
| C       | 5.414876000  | -0.597274000 | 0.333634000  |
| N       | 0.761644000  | 0.378979000  | -0.262233000 |
| H       | -0.177760000 | -1.484842000 | -0.364208000 |
| H       | 1.852553000  | -2.809748000 | -0.028534000 |
| H       | 4.703156000  | -2.621848000 | 0.378104000  |
| H       | 6.467922000  | -0.726869000 | 0.473682000  |
| S       | 1.953254000  | 2.848085000  | -0.351207000 |
| S       | 4.765306000  | 1.036278000  | 0.142721000  |
| C       | -0.549719000 | 1.043782000  | -0.181702000 |
| O       | -1.359500000 | 0.717667000  | -1.317181000 |
| C       | -1.360245000 | 0.656689000  | 1.034485000  |
| H       | -0.462149000 | 2.128176000  | -0.182116000 |
| C       | -2.732910000 | 0.746152000  | -0.903791000 |
| C       | -2.734627000 | 1.046367000  | 0.586108000  |
| H       | -1.041109000 | 1.175799000  | 1.942254000  |
| H       | -1.329902000 | -0.416453000 | 1.239989000  |

|         |              |              |              |
|---------|--------------|--------------|--------------|
| H       | -3.220537000 | 1.569286000  | -1.430768000 |
| H       | -2.861736000 | 2.121976000  | 0.734989000  |
| C       | -3.416490000 | -0.553230000 | -1.322442000 |
| H       | -4.487282000 | -0.510431000 | -1.109641000 |
| H       | -3.281915000 | -0.726887000 | -2.393319000 |
| O       | -2.877339000 | -1.680089000 | -0.642383000 |
| H       | -2.838212000 | -1.440383000 | 0.298816000  |
| O       | -3.756728000 | 0.371173000  | 1.308593000  |
| H       | -3.550903000 | 0.487944000  | 2.251351000  |
| O       | 3.810855000  | 5.641929000  | -1.934027000 |
| H       | 3.426874000  | 4.780968000  | -2.027919000 |
| H       | 4.684367000  | 5.515251000  | -1.589877000 |
| O       | 4.836931000  | 2.208651000  | 3.661197000  |
| H       | 4.899424000  | 1.929349000  | 2.758094000  |
| H       | 4.038991000  | 2.714023000  | 3.713602000  |
| coord_5 |              |              |              |
| C       | 3.152816000  | -1.076193000 | 0.089913000  |
| C       | 3.124812000  | 0.375734000  | -0.006096000 |
| C       | 1.976734000  | 1.076464000  | -0.189081000 |
| C       | 0.771707000  | -1.003606000 | -0.239486000 |
| C       | 1.923668000  | -1.736339000 | -0.052551000 |
| C       | 4.468693000  | -1.574902000 | 0.283019000  |
| C       | 5.419075000  | -0.593812000 | 0.336616000  |
| N       | 0.760828000  | 0.381484000  | -0.259441000 |
| H       | -0.174803000 | -1.485404000 | -0.370402000 |
| H       | 1.854691000  | -2.807284000 | -0.035403000 |
| H       | 4.702428000  | -2.617441000 | 0.379753000  |
| H       | 6.472025000  | -0.722595000 | 0.477033000  |
| S       | 1.963728000  | 2.850142000  | -0.354653000 |
| S       | 4.766754000  | 1.037751000  | 0.146516000  |
| C       | -0.549121000 | 1.046845000  | -0.175750000 |
| O       | -1.359024000 | 0.726108000  | -1.312606000 |
| C       | -1.359622000 | 0.654513000  | 1.038626000  |
| H       | -0.458229000 | 2.131137000  | -0.171336000 |
| C       | -2.732423000 | 0.751165000  | -0.898829000 |
| C       | -2.733967000 | 1.046325000  | 0.591985000  |
| H       | -1.040249000 | 1.169261000  | 1.948760000  |
| H       | -1.329250000 | -0.419596000 | 1.239023000  |
| H       | -3.221430000 | 1.575293000  | -1.422999000 |
| H       | -2.860598000 | 2.121464000  | 0.744427000  |
| C       | -3.414515000 | -0.547798000 | -1.321427000 |
| H       | -4.485461000 | -0.506652000 | -1.108992000 |



|         |              |              |              |
|---------|--------------|--------------|--------------|
| H       | -3.279332000 | -0.718338000 | -2.392705000 |
| O       | -2.874660000 | -1.676128000 | -0.644385000 |
| H       | -2.837519000 | -1.439691000 | 0.297699000  |
| O       | -3.756375000 | 0.369198000  | 1.312191000  |
| H       | -3.551951000 | 0.484937000  | 2.255386000  |
| O       | 3.798784000  | 5.628179000  | -1.931727000 |
| H       | 3.438667000  | 4.767555000  | -2.096508000 |
| H       | 4.675503000  | 5.501729000  | -1.595746000 |
| O       | 4.843269000  | 2.212091000  | 3.666263000  |
| H       | 4.902276000  | 1.911946000  | 2.770026000  |
| H       | 4.039843000  | 2.708993000  | 3.713179000  |
| coord_6 |              |              |              |
| C       | 3.155715000  | -1.069517000 | 0.092585000  |
| C       | 3.126743000  | 0.378195000  | -0.003193000 |
| C       | 1.977761000  | 1.079728000  | -0.188748000 |
| C       | 0.774345000  | -1.004332000 | -0.241765000 |
| C       | 1.922439000  | -1.733611000 | -0.055148000 |
| C       | 4.469861000  | -1.569960000 | 0.285401000  |
| C       | 5.423274000  | -0.590349000 | 0.339598000  |
| N       | 0.760011000  | 0.383989000  | -0.256649000 |
| H       | -0.171846000 | -1.485965000 | -0.376596000 |
| H       | 1.856828000  | -2.804819000 | -0.042271000 |
| H       | 4.701699000  | -2.613035000 | 0.381402000  |
| H       | 6.476128000  | -0.718321000 | 0.480383000  |
| S       | 1.974203000  | 2.852199000  | -0.358100000 |
| S       | 4.768202000  | 1.039225000  | 0.150312000  |
| C       | -0.548523000 | 1.049907000  | -0.169797000 |
| O       | -1.358548000 | 0.734549000  | -1.308031000 |
| C       | -1.358998000 | 0.652338000  | 1.042766000  |
| H       | -0.454308000 | 2.134097000  | -0.160556000 |
| C       | -2.731937000 | 0.756178000  | -0.893867000 |
| C       | -2.733306000 | 1.046282000  | 0.597862000  |
| H       | -1.039388000 | 1.162724000  | 1.955266000  |
| H       | -1.328599000 | -0.422740000 | 1.238057000  |
| H       | -3.222324000 | 1.581299000  | -1.415230000 |
| H       | -2.859459000 | 2.120951000  | 0.753865000  |
| C       | -3.412539000 | -0.542367000 | -1.320413000 |
| H       | -4.483640000 | -0.502872000 | -1.108343000 |
| H       | -3.276749000 | -0.709790000 | -2.392091000 |
| O       | -2.871981000 | -1.672166000 | -0.646388000 |
| H       | -2.836826000 | -1.438998000 | 0.296582000  |
| O       | -3.756021000 | 0.367222000  | 1.315790000  |

|         |              |              |              |
|---------|--------------|--------------|--------------|
| H       | -3.552998000 | 0.481930000  | 2.259421000  |
| O       | 3.786714000  | 5.614428000  | -1.929427000 |
| H       | 3.452851000  | 4.759552000  | -2.164444000 |
| H       | 4.666566000  | 5.488219000  | -1.601645000 |
| O       | 4.849609000  | 2.215532000  | 3.671329000  |
| H       | 4.905116000  | 1.894584000  | 2.782104000  |
| H       | 4.040694000  | 2.703963000  | 3.712757000  |
| coord_7 |              |              |              |
| C       | 3.158613000  | -1.062840000 | 0.095256000  |
| C       | 3.128674000  | 0.380656000  | -0.000289000 |
| C       | 1.978788000  | 1.082992000  | -0.188415000 |
| C       | 0.776984000  | -1.005057000 | -0.244044000 |
| C       | 1.921210000  | -1.730882000 | -0.057744000 |
| C       | 4.471030000  | -1.565019000 | 0.287783000  |
| C       | 5.427474000  | -0.586887000 | 0.342579000  |
| N       | 0.759195000  | 0.386494000  | -0.253858000 |
| H       | -0.168889000 | -1.486527000 | -0.382790000 |
| H       | 1.858966000  | -2.802354000 | -0.049140000 |
| H       | 4.700971000  | -2.608629000 | 0.383051000  |
| H       | 6.480231000  | -0.714047000 | 0.483734000  |
| S       | 1.984678000  | 2.854257000  | -0.361546000 |
| S       | 4.769651000  | 1.040698000  | 0.154107000  |
| C       | -0.547925000 | 1.052970000  | -0.163844000 |
| O       | -1.358073000 | 0.742990000  | -1.303456000 |
| C       | -1.358375000 | 0.650162000  | 1.046906000  |
| H       | -0.450388000 | 2.137057000  | -0.149776000 |
| C       | -2.731450000 | 0.761191000  | -0.888905000 |
| C       | -2.732645000 | 1.046240000  | 0.603738000  |
| H       | -1.038528000 | 1.156186000  | 1.961772000  |
| H       | -1.327948000 | -0.425884000 | 1.237091000  |
| H       | -3.223218000 | 1.587306000  | -1.407461000 |
| H       | -2.858321000 | 2.120439000  | 0.763304000  |
| C       | -3.410564000 | -0.536935000 | -1.319399000 |
| H       | -4.481818000 | -0.499092000 | -1.107695000 |
| H       | -3.274166000 | -0.701241000 | -2.391476000 |
| O       | -2.869302000 | -1.668204000 | -0.648391000 |
| H       | -2.836133000 | -1.438306000 | 0.295466000  |
| O       | -3.755668000 | 0.365247000  | 1.319388000  |
| H       | -3.554046000 | 0.478924000  | 2.263455000  |
| O       | 3.774644000  | 5.600678000  | -1.927128000 |
| H       | 3.468929000  | 4.756838000  | -2.230413000 |
| H       | 4.657552000  | 5.474718000  | -1.607570000 |

|         |              |              |              |
|---------|--------------|--------------|--------------|
| O       | 4.855948000  | 2.218973000  | 3.676395000  |
| H       | 4.907928000  | 1.877408000  | 2.794669000  |
| H       | 4.041545000  | 2.698933000  | 3.712334000  |
| coord_8 |              |              |              |
| C       | 3.161512000  | -1.056164000 | 0.097928000  |
| C       | 3.130605000  | 0.383118000  | 0.002615000  |
| C       | 1.979816000  | 1.086256000  | -0.188082000 |
| C       | 0.779623000  | -1.005783000 | -0.246323000 |
| C       | 1.919981000  | -1.728153000 | -0.060341000 |
| C       | 4.472199000  | -1.560077000 | 0.290165000  |
| C       | 5.431673000  | -0.583425000 | 0.345561000  |
| N       | 0.758379000  | 0.388999000  | -0.251066000 |
| H       | -0.165933000 | -1.487089000 | -0.388985000 |
| H       | 1.861104000  | -2.799889000 | -0.056009000 |
| H       | 4.700243000  | -2.604222000 | 0.384700000  |
| H       | 6.484334000  | -0.709773000 | 0.487085000  |
| S       | 1.995152000  | 2.856314000  | -0.364992000 |
| S       | 4.771099000  | 1.042171000  | 0.157903000  |
| C       | -0.547327000 | 1.056032000  | -0.157891000 |
| O       | -1.357597000 | 0.751430000  | -1.298881000 |
| C       | -1.357751000 | 0.647987000  | 1.051047000  |
| H       | -0.446467000 | 2.140018000  | -0.138996000 |
| C       | -2.730964000 | 0.766204000  | -0.883943000 |
| C       | -2.731984000 | 1.046198000  | 0.609615000  |
| H       | -1.037667000 | 1.149648000  | 1.968278000  |
| H       | -1.327297000 | -0.429027000 | 1.236125000  |
| H       | -3.224111000 | 1.593312000  | -1.399692000 |
| H       | -2.857182000 | 2.119926000  | 0.772742000  |
| C       | -3.408589000 | -0.531504000 | -1.318384000 |
| H       | -4.479997000 | -0.495312000 | -1.107046000 |
| H       | -3.271584000 | -0.692693000 | -2.390862000 |
| O       | -2.866623000 | -1.664243000 | -0.650394000 |
| H       | -2.835441000 | -1.437614000 | 0.294349000  |
| O       | -3.755314000 | 0.363271000  | 1.322987000  |
| H       | -3.555093000 | 0.475917000  | 2.267490000  |
| O       | 3.762573000  | 5.586927000  | -1.924828000 |
| H       | 3.486309000  | 4.759001000  | -2.293239000 |
| H       | 4.648193000  | 5.461267000  | -1.613616000 |
| O       | 4.862287000  | 2.222413000  | 3.681461000  |
| H       | 4.910611000  | 1.861238000  | 2.809604000  |
| H       | 4.042397000  | 2.693902000  | 3.711912000  |

coord\_9

|   |              |              |              |
|---|--------------|--------------|--------------|
| C | 3.164410000  | -1.049487000 | 0.100600000  |
| C | 3.132536000  | 0.385579000  | 0.005518000  |
| C | 1.980843000  | 1.089520000  | -0.187749000 |
| C | 0.782261000  | -1.006508000 | -0.248601000 |
| C | 1.918752000  | -1.725424000 | -0.062938000 |
| C | 4.473368000  | -1.555135000 | 0.292546000  |
| C | 5.435872000  | -0.579963000 | 0.348543000  |
| N | 0.757563000  | 0.391504000  | -0.248274000 |
| H | -0.162976000 | -1.487650000 | -0.395179000 |
| H | 1.863241000  | -2.797424000 | -0.062878000 |
| H | 4.699514000  | -2.599816000 | 0.386349000  |
| H | 6.488436000  | -0.705499000 | 0.490436000  |
| S | 2.005627000  | 2.858371000  | -0.368439000 |
| S | 4.772547000  | 1.043644000  | 0.161698000  |
| C | -0.546729000 | 1.059095000  | -0.151938000 |
| O | -1.357121000 | 0.759871000  | -1.294306000 |
| C | -1.357127000 | 0.645811000  | 1.055187000  |
| H | -0.442547000 | 2.142978000  | -0.128216000 |
| C | -2.730477000 | 0.771217000  | -0.878981000 |
| C | -2.731323000 | 1.046156000  | 0.615491000  |
| H | -1.036807000 | 1.143110000  | 1.974784000  |
| H | -1.326645000 | -0.432171000 | 1.235159000  |
| H | -3.225005000 | 1.599319000  | -1.391923000 |
| H | -2.856044000 | 2.119414000  | 0.782180000  |
| C | -3.406614000 | -0.526072000 | -1.317370000 |
| H | -4.478176000 | -0.491532000 | -1.106397000 |
| H | -3.269001000 | -0.684144000 | -2.390247000 |
| O | -2.863944000 | -1.660281000 | -0.652397000 |
| H | -2.834748000 | -1.436922000 | 0.293232000  |
| O | -3.754961000 | 0.361296000  | 1.326585000  |
| H | -3.556141000 | 0.472910000  | 2.271525000  |
| O | 3.750503000  | 5.573177000  | -1.922528000 |
| H | 3.504367000  | 4.765402000  | -2.351976000 |
| H | 4.639273000  | 5.447754000  | -1.619502000 |
| O | 4.868626000  | 2.225854000  | 3.686527000  |
| H | 4.913461000  | 1.843973000  | 2.821718000  |
| H | 4.043248000  | 2.688872000  | 3.711490000  |

coord\_10

|   |             |              |              |
|---|-------------|--------------|--------------|
| C | 3.168010000 | -1.042290000 | 0.103688000  |
| C | 3.135126000 | 0.388565000  | 0.008919000  |
| C | 1.982508000 | 1.093285000  | -0.186874000 |
| C | 0.785599000 | -1.006763000 | -0.250452000 |

|   |              |              |              |
|---|--------------|--------------|--------------|
| C | 1.918243000  | -1.722202000 | -0.065151000 |
| C | 4.475253000  | -1.549645000 | 0.295311000  |
| C | 5.440759000  | -0.575928000 | 0.351958000  |
| N | 0.757405000  | 0.394479000  | -0.244975000 |
| H | -0.159306000 | -1.487760000 | -0.400968000 |
| H | 1.866131000  | -2.794467000 | -0.069424000 |
| H | 4.699533000  | -2.594860000 | 0.388321000  |
| H | 6.493231000  | -0.700630000 | 0.494209000  |
| S | 2.016687000  | 2.860941000  | -0.371244000 |
| S | 4.774635000  | 1.045681000  | 0.166021000  |
| C | -0.545491000 | 1.062583000  | -0.145435000 |
| O | -1.356002000 | 0.768778000  | -1.289194000 |
| C | -1.355847000 | 0.643970000  | 1.059857000  |
| H | -0.438018000 | 2.146365000  | -0.116825000 |
| C | -2.729345000 | 0.776633000  | -0.873476000 |
| C | -2.730019000 | 1.046432000  | 0.621926000  |
| H | -1.035300000 | 1.136864000  | 1.981846000  |
| H | -1.325305000 | -0.434989000 | 1.234662000  |
| H | -3.225279000 | 1.605742000  | -1.383562000 |
| H | -2.854292000 | 2.119206000  | 0.792237000  |
| C | -3.403957000 | -0.520232000 | -1.315883000 |
| H | -4.475673000 | -0.487387000 | -1.105270000 |
| H | -3.265736000 | -0.675123000 | -2.389169000 |
| O | -2.860547000 | -1.655932000 | -0.653993000 |
| H | -2.833340000 | -1.435895000 | 0.292534000  |
| O | -3.753940000 | 0.359569000  | 1.330707000  |
| H | -3.556521000 | 0.470104000  | 2.276088000  |
| O | 3.738932000  | 5.560076000  | -1.919442000 |
| H | 3.522233000  | 4.773061000  | -2.406992000 |
| H | 4.630856000  | 5.434899000  | -1.624613000 |
| O | 4.875584000  | 2.229662000  | 3.692186000  |
| H | 4.916938000  | 1.827126000  | 2.834401000  |
| H | 4.044706000  | 2.684184000  | 3.711689000  |

**S<sub>2</sub>(<sup>1</sup>ππ\*) minimum to T<sub>2</sub>(<sup>3</sup>nπ\*) minimum**

coord\_1

|   |             |              |              |
|---|-------------|--------------|--------------|
| C | 3.141221000 | -1.102899000 | 0.079226000  |
| C | 3.117087000 | 0.365888000  | -0.017711000 |
| C | 1.972624000 | 1.063409000  | -0.190414000 |
| C | 0.761152000 | -1.000704000 | -0.230371000 |
| C | 1.928584000 | -1.747254000 | -0.042164000 |
| C | 4.464016000 | -1.594669000 | 0.273491000  |
| C | 5.402277000 | -0.607660000 | 0.324689000  |

|   |              |              |              |
|---|--------------|--------------|--------------|
| N | 0.764092000  | 0.371463000  | -0.270608000 |
| H | -0.186630000 | -1.483157000 | -0.345625000 |
| H | 1.846139000  | -2.817142000 | -0.007927000 |
| H | 4.705340000  | -2.635066000 | 0.373157000  |
| H | 6.455612000  | -0.739690000 | 0.463629000  |
| S | 1.921829000  | 2.841912000  | -0.340868000 |
| S | 4.760960000  | 1.031858000  | 0.131335000  |
| C | -0.551513000 | 1.034594000  | -0.199561000 |
| O | -1.360926000 | 0.692345000  | -1.330905000 |
| C | -1.362116000 | 0.663215000  | 1.022064000  |
| H | -0.473911000 | 2.119295000  | -0.214456000 |
| C | -2.734369000 | 0.731112000  | -0.918676000 |
| C | -2.736609000 | 1.046493000  | 0.568478000  |
| H | -1.043691000 | 1.195412000  | 1.922735000  |
| H | -1.331855000 | -0.407022000 | 1.242887000  |
| H | -3.217855000 | 1.551266000  | -1.454074000 |
| H | -2.865151000 | 2.123513000  | 0.706674000  |
| C | -3.422414000 | -0.569525000 | -1.325484000 |
| H | -4.492744000 | -0.521771000 | -1.111586000 |
| H | -3.289662000 | -0.752532000 | -2.395162000 |
| O | -2.885376000 | -1.691974000 | -0.636374000 |
| H | -2.840290000 | -1.442459000 | 0.302166000  |
| O | -3.757788000 | 0.377100000  | 1.297797000  |
| H | -3.547760000 | 0.496965000  | 2.239246000  |
| O | 3.847065000  | 5.683179000  | -1.940925000 |
| H | 3.408607000  | 4.850621000  | -1.830882000 |
| H | 4.710638000  | 5.555861000  | -1.572410000 |
| O | 4.817912000  | 2.198328000  | 3.645998000  |
| H | 4.890663000  | 1.982088000  | 2.724811000  |
| H | 4.036436000  | 2.729113000  | 3.714868000  |

coord\_2

|   |              |              |              |
|---|--------------|--------------|--------------|
| C | 3.142648000  | -1.096660000 | 0.086892000  |
| C | 3.118787000  | 0.366553000  | -0.013656000 |
| C | 1.973254000  | 1.065537000  | -0.190220000 |
| C | 0.762668000  | -1.001535000 | -0.230422000 |
| C | 1.925886000  | -1.745135000 | -0.042388000 |
| C | 4.464343000  | -1.590556000 | 0.281344000  |
| C | 5.405484000  | -0.605900000 | 0.329222000  |
| N | 0.761913000  | 0.373719000  | -0.258593000 |
| H | -0.184859000 | -1.483146000 | -0.351114000 |
| H | 1.847036000  | -2.815276000 | -0.014639000 |
| H | 4.703552000  | -2.631307000 | 0.382833000  |

|         |              |              |              |
|---------|--------------|--------------|--------------|
| H       | 6.458803000  | -0.737143000 | 0.468008000  |
| S       | 1.931765000  | 2.840048000  | -0.362250000 |
| S       | 4.762063000  | 1.031288000  | 0.132465000  |
| C       | -0.550737000 | 1.038520000  | -0.177279000 |
| O       | -1.361400000 | 0.712981000  | -1.311662000 |
| C       | -1.361314000 | 0.653261000  | 1.039159000  |
| H       | -0.466902000 | 2.122271000  | -0.177551000 |
| C       | -2.734566000 | 0.745233000  | -0.898115000 |
| C       | -2.735289000 | 1.044082000  | 0.591573000  |
| H       | -1.041577000 | 1.173056000  | 1.945718000  |
| H       | -1.332533000 | -0.419056000 | 1.246095000  |
| H       | -3.219831000 | 1.569998000  | -1.423943000 |
| H       | -2.861430000 | 2.119209000  | 0.741689000  |
| C       | -3.422041000 | -0.551178000 | -1.317882000 |
| H       | -4.492230000 | -0.506562000 | -1.102642000 |
| H       | -3.290318000 | -0.722692000 | -2.389060000 |
| O       | -2.883829000 | -1.680052000 | -0.641498000 |
| H       | -2.838941000 | -1.440968000 | 0.299272000  |
| O       | -3.757297000 | 0.368932000  | 1.313838000  |
| H       | -3.546034000 | 0.477164000  | 2.255843000  |
| O       | 3.828561000  | 5.667217000  | -1.920676000 |
| H       | 3.408450000  | 4.820200000  | -1.898023000 |
| H       | 4.698362000  | 5.550706000  | -1.568092000 |
| O       | 4.826209000  | 2.203638000  | 3.651810000  |
| H       | 4.896231000  | 1.971477000  | 2.735622000  |
| H       | 4.039306000  | 2.725985000  | 3.716839000  |
| coord_3 |              |              |              |
| C       | 3.144074000  | -1.090421000 | 0.094557000  |
| C       | 3.120486000  | 0.367217000  | -0.009600000 |
| C       | 1.973883000  | 1.067664000  | -0.190027000 |
| C       | 0.764183000  | -1.002366000 | -0.230474000 |
| C       | 1.923188000  | -1.743015000 | -0.042611000 |
| C       | 4.464669000  | -1.586443000 | 0.289198000  |
| C       | 5.408690000  | -0.604139000 | 0.333756000  |
| N       | 0.759734000  | 0.375976000  | -0.246578000 |
| H       | -0.183087000 | -1.483134000 | -0.356604000 |
| H       | 1.847932000  | -2.813410000 | -0.021350000 |
| H       | 4.701762000  | -2.627548000 | 0.392509000  |
| H       | 6.461992000  | -0.734597000 | 0.472386000  |
| S       | 1.941700000  | 2.838184000  | -0.383633000 |
| S       | 4.763164000  | 1.030718000  | 0.133595000  |
| C       | -0.549960000 | 1.042446000  | -0.154998000 |

|         |              |              |              |
|---------|--------------|--------------|--------------|
| O       | -1.361873000 | 0.733616000  | -1.292418000 |
| C       | -1.360512000 | 0.643308000  | 1.056253000  |
| H       | -0.459893000 | 2.125246000  | -0.140645000 |
| C       | -2.734762000 | 0.759354000  | -0.877555000 |
| C       | -2.733968000 | 1.041671000  | 0.614668000  |
| H       | -1.039463000 | 1.150701000  | 1.968700000  |
| H       | -1.333210000 | -0.431089000 | 1.249302000  |
| H       | -3.221805000 | 1.588729000  | -1.393812000 |
| H       | -2.857708000 | 2.114904000  | 0.776703000  |
| C       | -3.421667000 | -0.532832000 | -1.310280000 |
| H       | -4.491714000 | -0.491353000 | -1.093697000 |
| H       | -3.290972000 | -0.692851000 | -2.382958000 |
| O       | -2.882281000 | -1.668130000 | -0.646622000 |
| H       | -2.837592000 | -1.439476000 | 0.296379000  |
| O       | -3.756805000 | 0.360764000  | 1.329879000  |
| H       | -3.544307000 | 0.457364000  | 2.272440000  |
| O       | 3.810056000  | 5.651253000  | -1.900427000 |
| H       | 3.413085000  | 4.795188000  | -1.972558000 |
| H       | 4.687900000  | 5.545331000  | -1.563076000 |
| O       | 4.834505000  | 2.208947000  | 3.657621000  |
| H       | 4.901798000  | 1.960865000  | 2.746433000  |
| H       | 4.042174000  | 2.722857000  | 3.718809000  |
| coord_4 |              |              |              |
| C       | 3.145500000  | -1.084181000 | 0.102223000  |
| C       | 3.122186000  | 0.367881000  | -0.005545000 |
| C       | 1.974512000  | 1.069791000  | -0.189833000 |
| C       | 0.765698000  | -1.003197000 | -0.230525000 |
| C       | 1.920489000  | -1.740896000 | -0.042835000 |
| C       | 4.464995000  | -1.582330000 | 0.297051000  |
| C       | 5.411895000  | -0.602379000 | 0.338289000  |
| N       | 0.757555000  | 0.378232000  | -0.234562000 |
| H       | -0.181315000 | -1.483122000 | -0.362093000 |
| H       | 1.848828000  | -2.811543000 | -0.028062000 |
| H       | 4.699973000  | -2.623788000 | 0.402185000  |
| H       | 6.465182000  | -0.732050000 | 0.476764000  |
| S       | 1.951635000  | 2.836320000  | -0.405015000 |
| S       | 4.764265000  | 1.030147000  | 0.134725000  |
| C       | -0.549184000 | 1.046372000  | -0.132716000 |
| O       | -1.362346000 | 0.754251000  | -1.273174000 |
| C       | -1.359709000 | 0.633354000  | 1.073347000  |
| H       | -0.452884000 | 2.128221000  | -0.103740000 |
| C       | -2.734958000 | 0.773475000  | -0.856994000 |



|         |              |              |              |
|---------|--------------|--------------|--------------|
| C       | -2.732648000 | 1.039260000  | 0.637763000  |
| H       | -1.037349000 | 1.128345000  | 1.991682000  |
| H       | -1.333888000 | -0.443122000 | 1.252510000  |
| H       | -3.223780000 | 1.607460000  | -1.363681000 |
| H       | -2.853986000 | 2.110600000  | 0.811718000  |
| C       | -3.421293000 | -0.514485000 | -1.302677000 |
| H       | -4.491199000 | -0.476145000 | -1.084752000 |
| H       | -3.291627000 | -0.663011000 | -2.376856000 |
| O       | -2.880733000 | -1.656208000 | -0.651745000 |
| H       | -2.836243000 | -1.437984000 | 0.293485000  |
| O       | -3.756314000 | 0.352596000  | 1.345919000  |
| H       | -3.542580000 | 0.437563000  | 2.289037000  |
| O       | 3.791551000  | 5.635289000  | -1.880178000 |
| H       | 3.424160000  | 4.780281000  | -2.052283000 |
| H       | 4.676475000  | 5.540107000  | -1.558486000 |
| O       | 4.842800000  | 2.214256000  | 3.663432000  |
| H       | 4.907364000  | 1.950253000  | 2.757243000  |
| H       | 4.045043000  | 2.719729000  | 3.720778000  |
| coord_5 |              |              |              |
| C       | 3.146926000  | -1.077942000 | 0.109888000  |
| C       | 3.123885000  | 0.368546000  | -0.001490000 |
| C       | 1.975142000  | 1.071918000  | -0.189640000 |
| C       | 0.767213000  | -1.004027000 | -0.230576000 |
| C       | 1.917790000  | -1.738776000 | -0.043058000 |
| C       | 4.465321000  | -1.578217000 | 0.304904000  |
| C       | 5.415101000  | -0.600619000 | 0.342822000  |
| N       | 0.755375000  | 0.380488000  | -0.222547000 |
| H       | -0.179544000 | -1.483111000 | -0.367582000 |
| H       | 1.849724000  | -2.809677000 | -0.034773000 |
| H       | 4.698183000  | -2.620029000 | 0.411861000  |
| H       | 6.468371000  | -0.729503000 | 0.481142000  |
| S       | 1.961570000  | 2.834455000  | -0.426398000 |
| S       | 4.765366000  | 1.029577000  | 0.135856000  |
| C       | -0.548408000 | 1.050298000  | -0.110434000 |
| O       | -1.362819000 | 0.774887000  | -1.253930000 |
| C       | -1.358907000 | 0.623400000  | 1.090442000  |
| H       | -0.445875000 | 2.131196000  | -0.066834000 |
| C       | -2.735154000 | 0.787596000  | -0.836433000 |
| C       | -2.731327000 | 1.036849000  | 0.660858000  |
| H       | -1.035235000 | 1.105989000  | 2.014664000  |
| H       | -1.334565000 | -0.455156000 | 1.255718000  |
| H       | -3.225754000 | 1.626192000  | -1.333550000 |

|         |              |              |              |
|---------|--------------|--------------|--------------|
| H       | -2.850264000 | 2.106295000  | 0.846733000  |
| C       | -3.420918000 | -0.496138000 | -1.295075000 |
| H       | -4.490683000 | -0.460936000 | -1.075807000 |
| H       | -3.292282000 | -0.633170000 | -2.370753000 |
| O       | -2.879185000 | -1.644286000 | -0.656869000 |
| H       | -2.834894000 | -1.436492000 | 0.290591000  |
| O       | -3.755822000 | 0.344429000  | 1.361960000  |
| H       | -3.540853000 | 0.417762000  | 2.305633000  |
| O       | 3.773046000  | 5.619326000  | -1.859929000 |
| H       | 3.441136000  | 4.776419000  | -2.133753000 |
| H       | 4.664652000  | 5.534942000  | -1.554066000 |
| O       | 4.851096000  | 2.219565000  | 3.669243000  |
| H       | 4.912931000  | 1.939641000  | 2.768053000  |
| H       | 4.047911000  | 2.716600000  | 3.722748000  |
| coord_6 |              |              |              |
| C       | 3.148352000  | -1.071703000 | 0.117554000  |
| C       | 3.125584000  | 0.369210000  | 0.002565000  |
| C       | 1.975771000  | 1.074046000  | -0.189446000 |
| C       | 0.768729000  | -1.004858000 | -0.230627000 |
| C       | 1.915092000  | -1.736656000 | -0.043282000 |
| C       | 4.465647000  | -1.574104000 | 0.312758000  |
| C       | 5.418307000  | -0.598858000 | 0.347356000  |
| N       | 0.753196000  | 0.382745000  | -0.210532000 |
| H       | -0.177772000 | -1.483099000 | -0.373072000 |
| H       | 1.850620000  | -2.807810000 | -0.041485000 |
| H       | 4.696394000  | -2.616269000 | 0.421537000  |
| H       | 6.471560000  | -0.726957000 | 0.485521000  |
| S       | 1.971505000  | 2.832591000  | -0.447780000 |
| S       | 4.766468000  | 1.029007000  | 0.136986000  |
| C       | -0.547631000 | 1.054224000  | -0.088152000 |
| O       | -1.363292000 | 0.795522000  | -1.234686000 |
| C       | -1.358104000 | 0.613446000  | 1.107536000  |
| H       | -0.438866000 | 2.134171000  | -0.029929000 |
| C       | -2.735349000 | 0.801717000  | -0.815873000 |
| C       | -2.730006000 | 1.034439000  | 0.683953000  |
| H       | -1.033121000 | 1.083633000  | 2.037647000  |
| H       | -1.335243000 | -0.467189000 | 1.258925000  |
| H       | -3.227729000 | 1.644923000  | -1.303419000 |
| H       | -2.846542000 | 2.101990000  | 0.881747000  |
| C       | -3.420544000 | -0.477791000 | -1.287473000 |
| H       | -4.490167000 | -0.445727000 | -1.066862000 |
| H       | -3.292937000 | -0.603330000 | -2.364651000 |

|         |              |              |              |
|---------|--------------|--------------|--------------|
| O       | -2.877637000 | -1.632363000 | -0.661993000 |
| H       | -2.833544000 | -1.435001000 | 0.287697000  |
| O       | -3.755330000 | 0.336261000  | 1.378001000  |
| H       | -3.539127000 | 0.397961000  | 2.322230000  |
| O       | 3.754541000  | 5.603362000  | -1.839680000 |
| H       | 3.463028000  | 4.784001000  | -2.212914000 |
| H       | 4.652424000  | 5.529822000  | -1.549795000 |
| O       | 4.859391000  | 2.224874000  | 3.675054000  |
| H       | 4.918527000  | 1.928884000  | 2.778426000  |
| H       | 4.050779000  | 2.713472000  | 3.724718000  |
| coord_7 |              |              |              |
| C       | 3.149778000  | -1.065464000 | 0.125219000  |
| C       | 3.127283000  | 0.369874000  | 0.006621000  |
| C       | 1.976400000  | 1.076173000  | -0.189253000 |
| C       | 0.770244000  | -1.005689000 | -0.230679000 |
| C       | 1.912394000  | -1.734537000 | -0.043505000 |
| C       | 4.465973000  | -1.569991000 | 0.320611000  |
| C       | 5.421512000  | -0.597098000 | 0.351889000  |
| N       | 0.751017000  | 0.385001000  | -0.198517000 |
| H       | -0.176001000 | -1.483087000 | -0.378561000 |
| H       | 1.851516000  | -2.805944000 | -0.048196000 |
| H       | 4.694604000  | -2.612509000 | 0.431213000  |
| H       | 6.474749000  | -0.724410000 | 0.489899000  |
| S       | 1.981440000  | 2.830726000  | -0.469162000 |
| S       | 4.767569000  | 1.028437000  | 0.138116000  |
| C       | -0.546855000 | 1.058150000  | -0.065870000 |
| O       | -1.363765000 | 0.816157000  | -1.215442000 |
| C       | -1.357302000 | 0.603492000  | 1.124630000  |
| H       | -0.431858000 | 2.137147000  | 0.006977000  |
| C       | -2.735545000 | 0.815839000  | -0.795312000 |
| C       | -2.728685000 | 1.032028000  | 0.707048000  |
| H       | -1.031007000 | 1.061278000  | 2.060629000  |
| H       | -1.335920000 | -0.479222000 | 1.262133000  |
| H       | -3.229703000 | 1.663654000  | -1.273288000 |
| H       | -2.842821000 | 2.097685000  | 0.916762000  |
| C       | -3.420170000 | -0.459444000 | -1.279870000 |
| H       | -4.489652000 | -0.430518000 | -1.057917000 |
| H       | -3.293591000 | -0.573489000 | -2.358548000 |
| O       | -2.876089000 | -1.620441000 | -0.667117000 |
| H       | -2.832195000 | -1.433509000 | 0.284804000  |
| O       | -3.754838000 | 0.328093000  | 1.394042000  |
| H       | -3.537400000 | 0.378161000  | 2.338827000  |

|         |              |              |              |
|---------|--------------|--------------|--------------|
| O       | 3.736036000  | 5.587398000  | -1.819431000 |
| H       | 3.488234000  | 4.802093000  | -2.285827000 |
| H       | 4.639780000  | 5.524731000  | -1.545651000 |
| O       | 4.867687000  | 2.230184000  | 3.680865000  |
| H       | 4.924065000  | 1.918417000  | 2.789674000  |
| H       | 4.053648000  | 2.710344000  | 3.726687000  |
| coord_8 |              |              |              |
| C       | 3.151204000  | -1.059225000 | 0.132885000  |
| C       | 3.128983000  | 0.370539000  | 0.010676000  |
| C       | 1.977029000  | 1.078300000  | -0.189059000 |
| C       | 0.771759000  | -1.006520000 | -0.230730000 |
| C       | 1.909695000  | -1.732417000 | -0.043729000 |
| C       | 4.466299000  | -1.565877000 | 0.328464000  |
| C       | 5.424718000  | -0.595337000 | 0.356422000  |
| N       | 0.748838000  | 0.387257000  | -0.186502000 |
| H       | -0.174229000 | -1.483076000 | -0.384050000 |
| H       | 1.852412000  | -2.804077000 | -0.054908000 |
| H       | 4.692815000  | -2.608750000 | 0.440889000  |
| H       | 6.477939000  | -0.721863000 | 0.494278000  |
| S       | 1.991375000  | 2.828862000  | -0.490545000 |
| S       | 4.768670000  | 1.027866000  | 0.139246000  |
| C       | -0.546079000 | 1.062076000  | -0.043589000 |
| O       | -1.364238000 | 0.836793000  | -1.196198000 |
| C       | -1.356499000 | 0.593538000  | 1.141725000  |
| H       | -0.424849000 | 2.140122000  | 0.043882000  |
| C       | -2.735741000 | 0.829960000  | -0.774751000 |
| C       | -2.727365000 | 1.029617000  | 0.730143000  |
| H       | -1.028893000 | 1.038922000  | 2.083611000  |
| H       | -1.336598000 | -0.491256000 | 1.265340000  |
| H       | -3.231678000 | 1.682386000  | -1.243157000 |
| H       | -2.839099000 | 2.093381000  | 0.951777000  |
| C       | -3.419796000 | -0.441098000 | -1.272268000 |
| H       | -4.489136000 | -0.415309000 | -1.048973000 |
| H       | -3.294246000 | -0.543649000 | -2.352446000 |
| O       | -2.874541000 | -1.608519000 | -0.672241000 |
| H       | -2.830846000 | -1.432017000 | 0.281910000  |
| O       | -3.754346000 | 0.319925000  | 1.410082000  |
| H       | -3.535673000 | 0.358360000  | 2.355423000  |
| O       | 3.717531000  | 5.571434000  | -1.799182000 |
| H       | 3.514839000  | 4.828604000  | -2.349413000 |
| H       | 4.626713000  | 5.519655000  | -1.541612000 |
| O       | 4.875982000  | 2.235493000  | 3.686676000  |

|          |              |              |              |
|----------|--------------|--------------|--------------|
| H        | 4.929631000  | 1.907805000  | 2.800485000  |
| H        | 4.056516000  | 2.707215000  | 3.728657000  |
| coord_9  |              |              |              |
| C        | 3.152631000  | -1.052985000 | 0.140550000  |
| C        | 3.130682000  | 0.371203000  | 0.014731000  |
| C        | 1.977658000  | 1.080428000  | -0.188865000 |
| C        | 0.773275000  | -1.007351000 | -0.230781000 |
| C        | 1.906996000  | -1.730297000 | -0.043952000 |
| C        | 4.466625000  | -1.561764000 | 0.336317000  |
| C        | 5.427923000  | -0.593577000 | 0.360955000  |
| N        | 0.746658000  | 0.389514000  | -0.174486000 |
| H        | -0.172458000 | -1.483064000 | -0.389539000 |
| H        | 1.853308000  | -2.802211000 | -0.061620000 |
| H        | 4.691025000  | -2.604990000 | 0.450566000  |
| H        | 6.481128000  | -0.719316000 | 0.498656000  |
| S        | 2.001310000  | 2.826998000  | -0.511927000 |
| S        | 4.769772000  | 1.027296000  | 0.140376000  |
| C        | -0.545302000 | 1.066002000  | -0.021307000 |
| O        | -1.364711000 | 0.857428000  | -1.176955000 |
| C        | -1.355697000 | 0.583584000  | 1.158819000  |
| H        | -0.417840000 | 2.143097000  | 0.080787000  |
| C        | -2.735937000 | 0.844081000  | -0.754190000 |
| C        | -2.726044000 | 1.027206000  | 0.753238000  |
| H        | -1.026779000 | 1.016566000  | 2.106593000  |
| H        | -1.337275000 | -0.503289000 | 1.268548000  |
| H        | -3.233652000 | 1.701117000  | -1.213026000 |
| H        | -2.835377000 | 2.089076000  | 0.986791000  |
| C        | -3.419422000 | -0.422751000 | -1.264666000 |
| H        | -4.488621000 | -0.400101000 | -1.040028000 |
| H        | -3.294901000 | -0.513808000 | -2.346344000 |
| O        | -2.872993000 | -1.596596000 | -0.677364000 |
| H        | -2.829496000 | -1.430525000 | 0.279016000  |
| O        | -3.753855000 | 0.311757000  | 1.426123000  |
| H        | -3.533946000 | 0.338559000  | 2.372020000  |
| O        | 3.699026000  | 5.555471000  | -1.778933000 |
| H        | 3.540989000  | 4.860794000  | -2.401896000 |
| H        | 4.613218000  | 5.514578000  | -1.537654000 |
| O        | 4.884278000  | 2.240802000  | 3.692486000  |
| H        | 4.935198000  | 1.897193000  | 2.811295000  |
| H        | 4.059385000  | 2.704087000  | 3.730627000  |
| coord_10 |              |              |              |
| C        | 3.156471000  | -1.046750000 | 0.153865000  |

|   |              |              |              |
|---|--------------|--------------|--------------|
| C | 3.134334000  | 0.371931000  | 0.025260000  |
| C | 1.980005000  | 1.082367000  | -0.181744000 |
| C | 0.777179000  | -1.008731000 | -0.225075000 |
| C | 1.906925000  | -1.728472000 | -0.038877000 |
| C | 4.469536000  | -1.557346000 | 0.349476000  |
| C | 5.433404000  | -0.591214000 | 0.371320000  |
| N | 0.746420000  | 0.391170000  | -0.155900000 |
| H | -0.168150000 | -1.483811000 | -0.389513000 |
| H | 1.857175000  | -2.800640000 | -0.063653000 |
| H | 4.692161000  | -2.600921000 | 0.464933000  |
| H | 6.486637000  | -0.715908000 | 0.508755000  |
| S | 2.012389000  | 2.825155000  | -0.525371000 |
| S | 4.772619000  | 1.027245000  | 0.148301000  |
| C | -0.542797000 | 1.068818000  | 0.007986000  |
| O | -1.363435000 | 0.877362000  | -1.150781000 |
| C | -1.352963000 | 0.571578000  | 1.182665000  |
| H | -0.409444000 | 2.144937000  | 0.125324000  |
| C | -2.734362000 | 0.856813000  | -0.726662000 |
| C | -2.722951000 | 1.022533000  | 0.783396000  |
| H | -1.022834000 | 0.991710000  | 2.136559000  |
| H | -1.335667000 | -0.517425000 | 1.277874000  |
| H | -3.234149000 | 1.718559000  | -1.175409000 |
| H | -2.830215000 | 2.082332000  | 1.029488000  |
| C | -3.416889000 | -0.405708000 | -1.250804000 |
| H | -4.485944000 | -0.386671000 | -1.024774000 |
| H | -3.293410000 | -0.484603000 | -2.334032000 |
| O | -2.868886000 | -1.586135000 | -0.676934000 |
| H | -2.825603000 | -1.431037000 | 0.281765000  |
| O | -3.751334000 | 0.300610000  | 1.448845000  |
| H | -3.530161000 | 0.315301000  | 2.395298000  |
| O | 3.680747000  | 5.540776000  | -1.749229000 |
| H | 3.565457000  | 4.896719000  | -2.434574000 |
| H | 4.600388000  | 5.510892000  | -1.524142000 |
| O | 4.894056000  | 2.244604000  | 3.705794000  |
| H | 4.942331000  | 1.885598000  | 2.829392000  |
| H | 4.063591000  | 2.699164000  | 3.740387000  |

**S<sub>1</sub>(<sup>1</sup>nπ\*) minimum to <sup>1</sup>nπ\*/<sup>3</sup>ππ\***

coord\_1

|   |             |              |              |
|---|-------------|--------------|--------------|
| C | 3.168010900 | -1.042290300 | 0.103688000  |
| C | 3.135126900 | 0.388565100  | 0.008919000  |
| C | 1.982508600 | 1.093285300  | -0.186874100 |
| C | 0.785599200 | -1.006763300 | -0.250452100 |

|         |              |              |              |
|---------|--------------|--------------|--------------|
| C       | 1.918243500  | -1.722202500 | -0.065151000 |
| C       | 4.475254300  | -1.549645400 | 0.295311100  |
| C       | 5.440760500  | -0.575928200 | 0.351958100  |
| N       | 0.757405200  | 0.394479100  | -0.244975100 |
| H       | -0.159306000 | -1.487760400 | -0.400968100 |
| H       | 1.866131500  | -2.794467800 | -0.069424000 |
| H       | 4.699534300  | -2.594860700 | 0.388321100  |
| H       | 6.493232800  | -0.700630200 | 0.494209100  |
| S       | 2.016687600  | 2.860941800  | -0.371244100 |
| S       | 4.774636300  | 1.045681300  | 0.166021000  |
| C       | -0.545491200 | 1.062583300  | -0.145435000 |
| O       | -1.356002400 | 0.768778200  | -1.289194400 |
| C       | -1.355847400 | 0.643970200  | 1.059857300  |
| H       | -0.438018100 | 2.146365600  | -0.116825000 |
| C       | -2.729345800 | 0.776633200  | -0.873476200 |
| C       | -2.730019800 | 1.046432300  | 0.621926200  |
| H       | -1.035300300 | 1.136864300  | 1.981846600  |
| H       | -1.325305400 | -0.434989100 | 1.234662300  |
| H       | -3.225279900 | 1.605742400  | -1.383562400 |
| H       | -2.854292800 | 2.119206600  | 0.792237200  |
| C       | -3.403958000 | -0.520232100 | -1.315883400 |
| H       | -4.475674300 | -0.487387100 | -1.105270300 |
| H       | -3.265736900 | -0.675123200 | -2.389169700 |
| O       | -2.860547800 | -1.655932500 | -0.653993200 |
| H       | -2.833340800 | -1.435895400 | 0.292534100  |
| O       | -3.753941100 | 0.359569100  | 1.330707400  |
| H       | -3.556522000 | 0.470104100  | 2.276088600  |
| O       | 3.738933000  | 5.560077600  | -1.919442500 |
| H       | 3.522234000  | 4.773062300  | -2.406992700 |
| H       | 4.630857300  | 5.434900500  | -1.624613500 |
| O       | 4.875585400  | 2.229662600  | 3.692187000  |
| H       | 4.916939400  | 1.827126500  | 2.834401800  |
| H       | 4.044707100  | 2.684184800  | 3.711690000  |
| coord_2 |              |              |              |
| C       | 3.168244000  | -1.015187000 | 0.105770000  |
| C       | 3.123691000  | 0.412491000  | -0.001336000 |
| C       | 1.964188000  | 1.106508000  | -0.193067000 |
| C       | 0.785615000  | -1.001304000 | -0.231409000 |
| C       | 1.921941000  | -1.706277000 | -0.050514000 |
| C       | 4.479937000  | -1.511236000 | 0.291760000  |
| C       | 5.438175000  | -0.530545000 | 0.332119000  |
| N       | 0.743976000  | 0.399208000  | -0.227780000 |

|   |              |              |              |
|---|--------------|--------------|--------------|
| H | -0.157370000 | -1.488912000 | -0.375187000 |
| H | 1.878691000  | -2.779221000 | -0.048213000 |
| H | 4.710234000  | -2.554821000 | 0.392060000  |
| H | 6.492753000  | -0.645151000 | 0.467917000  |
| S | 1.980542000  | 2.875445000  | -0.395361000 |
| S | 4.757725000  | 1.082852000  | 0.137650000  |
| C | -0.562433000 | 1.057046000  | -0.115680000 |
| O | -1.373919000 | 0.769741000  | -1.260143000 |
| C | -1.366894000 | 0.620684000  | 1.087324000  |
| H | -0.462509000 | 2.141108000  | -0.073941000 |
| C | -2.746012000 | 0.773313000  | -0.841340000 |
| C | -2.742523000 | 1.025172000  | 0.657606000  |
| H | -1.046166000 | 1.104208000  | 2.014208000  |
| H | -1.334271000 | -0.459948000 | 1.250167000  |
| H | -3.242826000 | 1.608811000  | -1.340029000 |
| H | -2.867147000 | 2.095516000  | 0.842019000  |
| C | -3.422306000 | -0.517593000 | -1.298046000 |
| H | -4.492530000 | -0.488682000 | -1.079867000 |
| H | -3.291725000 | -0.656829000 | -2.374574000 |
| O | -2.873322000 | -1.661763000 | -0.655360000 |
| H | -2.832375000 | -1.451462000 | 0.292884000  |
| O | -3.761734000 | 0.326672000  | 1.361491000  |
| H | -3.551227000 | 0.410563000  | 2.306698000  |
| O | 3.780081000  | 5.507642000  | -1.864412000 |
| H | 3.603321000  | 4.735290000  | -2.384358000 |
| H | 4.657782000  | 5.376736000  | -1.531815000 |
| O | 4.879614000  | 2.197941000  | 3.689721000  |
| H | 4.913439000  | 1.817101000  | 2.824466000  |
| H | 4.050860000  | 2.652694000  | 3.726350000  |

coord\_3

|   |              |              |              |
|---|--------------|--------------|--------------|
| C | 3.168477000  | -0.988083000 | 0.107851000  |
| C | 3.112255000  | 0.436418000  | -0.011591000 |
| C | 1.945867000  | 1.119730000  | -0.199260000 |
| C | 0.785631000  | -0.995845000 | -0.212366000 |
| C | 1.925637000  | -1.690353000 | -0.035877000 |
| C | 4.484620000  | -1.472827000 | 0.288210000  |
| C | 5.435589000  | -0.485162000 | 0.312279000  |
| N | 0.730546000  | 0.403937000  | -0.210584000 |
| H | -0.155013000 | -1.490674000 | -0.348929000 |
| H | 1.891259000  | -2.763650000 | -0.027460000 |
| H | 4.723315000  | -2.513882000 | 0.396568000  |
| H | 6.492035000  | -0.590452000 | 0.441759000  |



|         |              |              |              |
|---------|--------------|--------------|--------------|
| S       | 1.944397000  | 2.889948000  | -0.419477000 |
| S       | 4.740813000  | 1.120024000  | 0.109279000  |
| C       | -0.576926000 | 1.052416000  | -0.061190000 |
| O       | -1.409217000 | 0.779645000  | -1.194011000 |
| C       | -1.356640000 | 0.592440000  | 1.149548000  |
| H       | -0.480078000 | 2.136074000  | -0.002823000 |
| C       | -2.773340000 | 0.773239000  | -0.748665000 |
| C       | -2.742515000 | 0.996893000  | 0.754395000  |
| H       | -1.020514000 | 1.061426000  | 2.078327000  |
| H       | -1.316544000 | -0.490752000 | 1.293555000  |
| H       | -3.280989000 | 1.616898000  | -1.222201000 |
| H       | -2.870952000 | 2.062645000  | 0.961912000  |
| C       | -3.456678000 | -0.510303000 | -1.214979000 |
| H       | -4.521857000 | -0.488660000 | -0.971525000 |
| H       | -3.350466000 | -0.627702000 | -2.296557000 |
| O       | -2.889144000 | -1.665092000 | -0.608254000 |
| H       | -2.828252000 | -1.474170000 | 0.343102000  |
| O       | -3.744245000 | 0.278899000  | 1.463893000  |
| H       | -3.516688000 | 0.345397000  | 2.406598000  |
| O       | 3.821230000  | 5.455207000  | -1.809381000 |
| H       | 3.685242000  | 4.697760000  | -2.362462000 |
| H       | 4.682863000  | 5.318741000  | -1.439135000 |
| O       | 4.883644000  | 2.166219000  | 3.687254000  |
| H       | 4.910023000  | 1.805934000  | 2.811756000  |
| H       | 4.057013000  | 2.621204000  | 3.741011000  |
| coord_4 |              |              |              |
| C       | 3.168710000  | -0.960980000 | 0.109933000  |
| C       | 3.100819000  | 0.460344000  | -0.021846000 |
| C       | 1.927546000  | 1.132953000  | -0.205453000 |
| C       | 0.785647000  | -0.990386000 | -0.193323000 |
| C       | 1.929334000  | -1.674428000 | -0.021240000 |
| C       | 4.489303000  | -1.434418000 | 0.284659000  |
| C       | 5.433003000  | -0.439778000 | 0.292440000  |
| N       | 0.717116000  | 0.408666000  | -0.193389000 |
| H       | -0.151716000 | -1.493765000 | -0.322396000 |
| H       | 1.903863000  | -2.747978000 | -0.006476000 |
| H       | 4.736434000  | -2.472756000 | 0.400467000  |
| H       | 6.491165000  | -0.536028000 | 0.414766000  |
| S       | 1.908252000  | 2.904452000  | -0.443593000 |
| S       | 4.723901000  | 1.157195000  | 0.080907000  |
| C       | -0.595831000 | 1.050199000  | -0.068195000 |
| O       | -1.404801000 | 0.774406000  | -1.216734000 |

|         |              |              |              |
|---------|--------------|--------------|--------------|
| C       | -1.395871000 | 0.587085000  | 1.127489000  |
| H       | -0.506266000 | 2.134382000  | -0.007384000 |
| C       | -2.776883000 | 0.762576000  | -0.797004000 |
| C       | -2.773981000 | 0.990845000  | 0.705450000  |
| H       | -1.077006000 | 1.057738000  | 2.061538000  |
| H       | -1.356546000 | -0.496122000 | 1.271428000  |
| H       | -3.280238000 | 1.602390000  | -1.281473000 |
| H       | -2.903436000 | 2.057739000  | 0.906241000  |
| C       | -3.444313000 | -0.525435000 | -1.273810000 |
| H       | -4.514530000 | -0.508764000 | -1.053809000 |
| H       | -3.313670000 | -0.645448000 | -2.352514000 |
| O       | -2.885278000 | -1.675355000 | -0.650758000 |
| H       | -2.845256000 | -1.479289000 | 0.300575000  |
| O       | -3.790354000 | 0.277038000  | 1.397983000  |
| H       | -3.581536000 | 0.347614000  | 2.344745000  |
| O       | 3.862378000  | 5.402771000  | -1.754351000 |
| H       | 3.768367000  | 4.663084000  | -2.339279000 |
| H       | 4.706127000  | 5.260956000  | -1.346807000 |
| O       | 4.887673000  | 2.134498000  | 3.684788000  |
| H       | 4.906536000  | 1.795317000  | 2.800075000  |
| H       | 4.060973000  | 2.590924000  | 3.755860000  |
| coord_5 |              |              |              |
| C       | 3.168943000  | -0.933876000 | 0.112015000  |
| C       | 3.089383000  | 0.484270000  | -0.032101000 |
| C       | 1.909225000  | 1.146175000  | -0.211646000 |
| C       | 0.785663000  | -0.984928000 | -0.174281000 |
| C       | 1.933031000  | -1.658503000 | -0.006603000 |
| C       | 4.493985000  | -1.396009000 | 0.281109000  |
| C       | 5.430417000  | -0.394395000 | 0.272600000  |
| N       | 0.703686000  | 0.413396000  | -0.176193000 |
| H       | -0.149062000 | -1.495421000 | -0.295612000 |
| H       | 1.916757000  | -2.732134000 | 0.014256000  |
| H       | 4.749763000  | -2.431422000 | 0.404722000  |
| H       | 6.490126000  | -0.481550000 | 0.388226000  |
| S       | 1.872107000  | 2.918955000  | -0.467710000 |
| S       | 4.706990000  | 1.194366000  | 0.052536000  |
| C       | -0.610535000 | 1.045253000  | -0.022091000 |
| O       | -1.434863000 | 0.780572000  | -1.162445000 |
| C       | -1.392629000 | 0.565315000  | 1.179516000  |
| H       | -0.522661000 | 2.128464000  | 0.052063000  |
| C       | -2.800959000 | 0.759088000  | -0.723445000 |
| C       | -2.777939000 | 0.969289000  | 0.781561000  |

|         |              |              |              |
|---------|--------------|--------------|--------------|
| H       | -1.064030000 | 1.025675000  | 2.115362000  |
| H       | -1.347610000 | -0.519174000 | 1.310939000  |
| H       | -3.314253000 | 1.602512000  | -1.191163000 |
| H       | -2.909263000 | 2.033118000  | 0.997650000  |
| C       | -3.471771000 | -0.525772000 | -1.204435000 |
| H       | -4.537900000 | -0.516198000 | -0.964379000 |
| H       | -3.360452000 | -0.631538000 | -2.286703000 |
| O       | -2.896500000 | -1.681581000 | -0.607618000 |
| H       | -2.844152000 | -1.500924000 | 0.346166000  |
| O       | -3.781854000 | 0.242922000  | 1.479191000  |
| H       | -3.557741000 | 0.298123000  | 2.423377000  |
| O       | 3.903526000  | 5.350335000  | -1.699320000 |
| H       | 3.852295000  | 4.631198000  | -2.314408000 |
| H       | 4.727639000  | 5.203417000  | -1.255058000 |
| O       | 4.891702000  | 2.102776000  | 3.682322000  |
| H       | 4.902997000  | 1.785421000  | 2.790152000  |
| H       | 4.066870000  | 2.559579000  | 3.770593000  |
| coord_6 |              |              |              |
| C       | 3.169176000  | -0.906773000 | 0.114097000  |
| C       | 3.077948000  | 0.508196000  | -0.042356000 |
| C       | 1.890904000  | 1.159398000  | -0.217839000 |
| C       | 0.785679000  | -0.979469000 | -0.155238000 |
| C       | 1.936728000  | -1.642578000 | 0.008034000  |
| C       | 4.498668000  | -1.357600000 | 0.277558000  |
| C       | 5.427831000  | -0.349011000 | 0.252761000  |
| N       | 0.690257000  | 0.418125000  | -0.158998000 |
| H       | -0.145785000 | -1.497800000 | -0.269062000 |
| H       | 1.929786000  | -2.716177000 | 0.034928000  |
| H       | 4.763155000  | -2.389891000 | 0.408646000  |
| H       | 6.488940000  | -0.427332000 | 0.361375000  |
| S       | 1.835961000  | 2.933458000  | -0.491826000 |
| S       | 4.690078000  | 1.231538000  | 0.024165000  |
| C       | -0.627811000 | 1.043209000  | -0.008446000 |
| O       | -1.445236000 | 0.781165000  | -1.154237000 |
| C       | -1.414554000 | 0.555151000  | 1.186438000  |
| H       | -0.544501000 | 2.126384000  | 0.072695000  |
| C       | -2.813641000 | 0.752129000  | -0.722194000 |
| C       | -2.799036000 | 0.957440000  | 0.783616000  |
| H       | -1.091112000 | 1.011186000  | 2.126153000  |
| H       | -1.367665000 | -0.529835000 | 1.311995000  |
| H       | -3.328601000 | 1.594739000  | -1.189906000 |
| H       | -2.935454000 | 2.019840000  | 1.003306000  |

|         |              |              |              |
|---------|--------------|--------------|--------------|
| C       | -3.474885000 | -0.535169000 | -1.209619000 |
| H       | -4.542390000 | -0.532486000 | -0.975785000 |
| H       | -3.357029000 | -0.637002000 | -2.291604000 |
| O       | -2.896795000 | -1.689480000 | -0.611804000 |
| H       | -2.849752000 | -1.510601000 | 0.342654000  |
| O       | -3.803752000 | 0.225449000  | 1.473737000  |
| H       | -3.583668000 | 0.278989000  | 2.419066000  |
| O       | 3.944675000  | 5.297900000  | -1.644290000 |
| H       | 3.936587000  | 4.601948000  | -2.287486000 |
| H       | 4.747496000  | 5.146156000  | -1.164114000 |
| O       | 4.895731000  | 2.071054000  | 3.679856000  |
| H       | 4.899458000  | 1.775501000  | 2.780165000  |
| H       | 4.073043000  | 2.528081000  | 3.785303000  |
| coord_7 |              |              |              |
| C       | 3.169409000  | -0.879669000 | 0.116178000  |
| C       | 3.066512000  | 0.532122000  | -0.052610000 |
| C       | 1.872583000  | 1.172620000  | -0.224032000 |
| C       | 0.785695000  | -0.974010000 | -0.136195000 |
| C       | 1.940425000  | -1.626653000 | 0.022671000  |
| C       | 4.503351000  | -1.319191000 | 0.274008000  |
| C       | 5.425245000  | -0.303628000 | 0.232922000  |
| N       | 0.676827000  | 0.422854000  | -0.141802000 |
| H       | -0.142120000 | -1.500495000 | -0.242736000 |
| H       | 1.943055000  | -2.700083000 | 0.055392000  |
| H       | 4.776668000  | -2.348155000 | 0.412744000  |
| H       | 6.487608000  | -0.373334000 | 0.334486000  |
| S       | 1.799816000  | 2.947962000  | -0.515942000 |
| S       | 4.673166000  | 1.268709000  | -0.004206000 |
| C       | -0.644296000 | 1.040815000  | -0.003055000 |
| O       | -1.445620000 | 0.780915000  | -1.160091000 |
| C       | -1.442606000 | 0.543941000  | 1.180169000  |
| H       | -0.565685000 | 2.123893000  | 0.084199000  |
| C       | -2.818490000 | 0.745511000  | -0.744801000 |
| C       | -2.822285000 | 0.946522000  | 0.761750000  |
| H       | -1.130518000 | 0.996341000  | 2.125517000  |
| H       | -1.394706000 | -0.541616000 | 1.300919000  |
| H       | -3.330702000 | 1.587535000  | -1.216187000 |
| H       | -2.960510000 | 2.008583000  | 0.982298000  |
| C       | -3.469146000 | -0.542402000 | -1.244737000 |
| H       | -4.539564000 | -0.541681000 | -1.025571000 |
| H       | -3.336179000 | -0.642181000 | -2.325230000 |
| O       | -2.897509000 | -1.696859000 | -0.641258000 |

|         |              |              |              |
|---------|--------------|--------------|--------------|
| H       | -2.861601000 | -1.518457000 | 0.313662000  |
| O       | -3.835480000 | 0.212859000  | 1.437305000  |
| H       | -3.626501000 | 0.262266000  | 2.385240000  |
| O       | 3.985823000  | 5.245464000  | -1.589259000 |
| H       | 4.020785000  | 4.575093000  | -2.258211000 |
| H       | 4.765821000  | 5.089204000  | -1.074185000 |
| O       | 4.899760000  | 2.039332000  | 3.677389000  |
| H       | 4.895923000  | 1.765761000  | 2.770773000  |
| H       | 4.079490000  | 2.496431000  | 3.799971000  |
| coord_8 |              |              |              |
| C       | 3.169642000  | -0.852566000 | 0.118260000  |
| C       | 3.055076000  | 0.556049000  | -0.062865000 |
| C       | 1.854262000  | 1.185842000  | -0.230225000 |
| C       | 0.785710000  | -0.968551000 | -0.117152000 |
| C       | 1.944122000  | -1.610728000 | 0.037308000  |
| C       | 4.508034000  | -1.280782000 | 0.270457000  |
| C       | 5.422660000  | -0.258245000 | 0.213082000  |
| N       | 0.663397000  | 0.427583000  | -0.124607000 |
| H       | -0.138576000 | -1.502632000 | -0.216413000 |
| H       | 1.956469000  | -2.683857000 | 0.075642000  |
| H       | 4.790317000  | -2.306220000 | 0.416957000  |
| H       | 6.486112000  | -0.319470000 | 0.307827000  |
| S       | 1.763671000  | 2.962465000  | -0.540059000 |
| S       | 4.656255000  | 1.305880000  | -0.032578000 |
| C       | -0.661588000 | 1.038833000  | 0.012181000  |
| O       | -1.454639000 | 0.788096000  | -1.152613000 |
| C       | -1.466534000 | 0.530410000  | 1.186046000  |
| H       | -0.586724000 | 2.121288000  | 0.110874000  |
| C       | -2.830213000 | 0.742691000  | -0.746170000 |
| C       | -2.844502000 | 0.932089000  | 0.761689000  |
| H       | -1.162770000 | 0.976593000  | 2.137087000  |
| H       | -1.417609000 | -0.555782000 | 1.298805000  |
| H       | -3.344721000 | 1.584976000  | -1.214862000 |
| H       | -2.987064000 | 1.991783000  | 0.989935000  |
| C       | -3.470515000 | -0.545628000 | -1.258051000 |
| H       | -4.542526000 | -0.552608000 | -1.046083000 |
| H       | -3.329894000 | -0.638547000 | -2.338060000 |
| O       | -2.895064000 | -1.699704000 | -0.657599000 |
| H       | -2.868552000 | -1.527375000 | 0.298859000  |
| O       | -3.859509000 | 0.189855000  | 1.425176000  |
| H       | -3.656348000 | 0.232162000  | 2.374737000  |
| O       | 4.026971000  | 5.193029000  | -1.534228000 |

|         |              |              |              |
|---------|--------------|--------------|--------------|
| H       | 4.104439000  | 4.550319000  | -2.226355000 |
| H       | 4.782769000  | 5.032581000  | -0.985463000 |
| O       | 4.903789000  | 2.007611000  | 3.674923000  |
| H       | 4.892404000  | 1.756158000  | 2.761988000  |
| H       | 4.086208000  | 2.464629000  | 3.814580000  |
| coord_9 |              |              |              |
| C       | 3.169875000  | -0.825462000 | 0.120342000  |
| C       | 3.043640000  | 0.579975000  | -0.073120000 |
| C       | 1.835941000  | 1.199065000  | -0.236418000 |
| C       | 0.785726000  | -0.963092000 | -0.098109000 |
| C       | 1.947819000  | -1.594803000 | 0.051945000  |
| C       | 4.512716000  | -1.242373000 | 0.266906000  |
| C       | 5.420074000  | -0.212861000 | 0.193243000  |
| N       | 0.649968000  | 0.432312000  | -0.107412000 |
| H       | -0.135302000 | -1.504482000 | -0.190334000 |
| H       | 1.970539000  | -2.667984000 | 0.095865000  |
| H       | 4.804065000  | -2.264313000 | 0.420987000  |
| H       | 6.484511000  | -0.266068000 | 0.280873000  |
| S       | 1.727526000  | 2.976968000  | -0.564175000 |
| S       | 4.639343000  | 1.343051000  | -0.060949000 |
| C       | -0.676788000 | 1.036219000  | 0.032193000  |
| O       | -1.466690000 | 0.790527000  | -1.135516000 |
| C       | -1.480509000 | 0.515971000  | 1.201231000  |
| H       | -0.605192000 | 2.118168000  | 0.138721000  |
| C       | -2.842490000 | 0.737778000  | -0.730967000 |
| C       | -2.858670000 | 0.917694000  | 0.778172000  |
| H       | -1.178223000 | 0.954211000  | 2.156514000  |
| H       | -1.428432000 | -0.570936000 | 1.304242000  |
| H       | -3.359099000 | 1.581693000  | -1.194193000 |
| H       | -3.003506000 | 1.975902000  | 1.011773000  |
| C       | -3.477429000 | -0.548481000 | -1.253996000 |
| H       | -4.549657000 | -0.561005000 | -1.043745000 |
| H       | -3.334793000 | -0.631609000 | -2.334613000 |
| O       | -2.898413000 | -1.705519000 | -0.662695000 |
| H       | -2.872753000 | -1.541079000 | 0.295016000  |
| O       | -3.872312000 | 0.170182000  | 1.437527000  |
| H       | -3.667522000 | 0.206522000  | 2.387064000  |
| O       | 4.068120000  | 5.140593000  | -1.479198000 |
| H       | 4.187130000  | 4.527258000  | -2.191780000 |
| H       | 4.798510000  | 4.976306000  | -0.898116000 |
| O       | 4.907819000  | 1.975889000  | 3.672457000  |
| H       | 4.888940000  | 1.746921000  | 2.754914000  |

|                                                                                 |              |              |              |
|---------------------------------------------------------------------------------|--------------|--------------|--------------|
| H                                                                               | 4.093932000  | 2.432260000  | 3.828973000  |
| coord_10                                                                        |              |              |              |
| C                                                                               | 3.170108300  | -0.798358900 | 0.122423200  |
| C                                                                               | 3.032204300  | 0.603901100  | -0.083375200 |
| C                                                                               | 1.817620600  | 1.212287300  | -0.242611200 |
| C                                                                               | 0.785742300  | -0.957632900 | -0.079066100 |
| C                                                                               | 1.951516200  | -1.578878000 | 0.066581800  |
| C                                                                               | 4.517399300  | -1.203964200 | 0.263356000  |
| C                                                                               | 5.417487900  | -0.167478100 | 0.173403400  |
| N                                                                               | 0.636537800  | 0.437041100  | -0.090216200 |
| H                                                                               | -0.129393400 | -1.509819600 | -0.163869700 |
| H                                                                               | 1.980585000  | -2.650302200 | 0.117062400  |
| H                                                                               | 4.817099100  | -2.222068300 | 0.425680100  |
| H                                                                               | 6.483546200  | -0.210592900 | 0.252549800  |
| S                                                                               | 1.691380400  | 2.991471500  | -0.588291600 |
| S                                                                               | 4.622431500  | 1.380222600  | -0.089320100 |
| C                                                                               | -0.691349000 | 1.033230300  | 0.058512500  |
| O                                                                               | -1.477348000 | 0.803962900  | -1.114680300 |
| C                                                                               | -1.496446900 | 0.494209000  | 1.218453300  |
| H                                                                               | -0.619988500 | 2.113163400  | 0.182109000  |
| C                                                                               | -2.853486700 | 0.738150400  | -0.713826000 |
| C                                                                               | -2.873977400 | 0.900004300  | 0.797277300  |
| H                                                                               | -1.197459900 | 0.919424600  | 2.180477100  |
| H                                                                               | -1.443250200 | -0.593765600 | 1.307259500  |
| H                                                                               | -3.373812200 | 1.584265900  | -1.168823900 |
| H                                                                               | -3.019408600 | 1.955209300  | 1.043613700  |
| C                                                                               | -3.479492300 | -0.546392200 | -1.252149400 |
| H                                                                               | -4.552405500 | -0.566178300 | -1.046381800 |
| H                                                                               | -3.332157700 | -0.618094700 | -2.332987700 |
| O                                                                               | -2.898169500 | -1.706802300 | -0.669665800 |
| H                                                                               | -2.878028600 | -1.552019000 | 0.289966600  |
| O                                                                               | -3.889384300 | 0.144110800  | 1.444326200  |
| H                                                                               | -3.689848700 | 0.170931400  | 2.395285300  |
| O                                                                               | 4.109267900  | 5.088157800  | -1.424167300 |
| H                                                                               | 4.268537500  | 4.505314200  | -2.154675800 |
| H                                                                               | 4.813527800  | 4.920317300  | -0.812029400 |
| O                                                                               | 4.911847700  | 1.944167100  | 3.669990800  |
| H                                                                               | 4.885439800  | 1.736894900  | 2.744978000  |
| H                                                                               | 4.100085100  | 2.400769400  | 3.843632900  |
| <b><math>^1n\pi^*/^3\pi\pi^*</math> to <math>T_1(^3\pi\pi^*)</math> minimum</b> |              |              |              |
| coord_1                                                                         |              |              |              |
| C                                                                               | 3.210278900  | -0.806598200 | 0.153924000  |

|         |              |              |              |
|---------|--------------|--------------|--------------|
| C       | 3.070894900  | 0.596091200  | -0.047913000 |
| C       | 1.855670500  | 1.203640300  | -0.205448100 |
| C       | 0.826085200  | -0.967823300 | -0.048052000 |
| C       | 1.992513600  | -1.588244400 | 0.095858000  |
| C       | 4.557996300  | -1.211175300 | 0.293731100  |
| C       | 5.456989500  | -0.173488000 | 0.206722100  |
| N       | 0.675406200  | 0.426718100  | -0.055263000 |
| H       | -0.088465000 | -1.520735400 | -0.134430000 |
| H       | 2.022714600  | -2.659775700 | 0.143311000  |
| H       | 4.858770400  | -2.229416600 | 0.453182100  |
| H       | 6.523091800  | -0.215699100 | 0.285763100  |
| S       | 1.727553500  | 2.983659800  | -0.546101200 |
| S       | 4.660300300  | 1.374107400  | -0.051639000 |
| C       | -0.653112200 | 1.021080300  | 0.095129000  |
| O       | -1.438853400 | 0.794298200  | -1.078719300 |
| C       | -1.457654400 | 0.477932100  | 1.253529400  |
| H       | -0.582895200 | 2.100734600  | 0.221778100  |
| C       | -2.814926800 | 0.725898200  | -0.678074200 |
| C       | -2.835607800 | 0.883459200  | 0.833480200  |
| H       | -1.159129300 | 0.900743300  | 2.216755600  |
| H       | -1.403308400 | -0.610232200 | 1.339261400  |
| H       | -3.336140900 | 1.572745400  | -1.130687300 |
| H       | -2.982157800 | 1.937809500  | 1.082795300  |
| C       | -3.439567000 | -0.557779200 | -1.220035300 |
| H       | -4.512461300 | -0.579281200 | -1.014341300 |
| H       | -3.292142900 | -0.626271200 | -2.301069600 |
| O       | -2.857024800 | -1.719215500 | -0.640824200 |
| H       | -2.837059800 | -1.567123400 | 0.319242100  |
| O       | -3.850223100 | 0.124667000  | 1.478374400  |
| H       | -3.650728000 | 0.149011000  | 2.429408700  |
| O       | 4.143233200  | 5.085255400  | -1.376010400 |
| H       | 4.303128200  | 4.504647300  | -2.108160600 |
| H       | 4.847662400  | 4.916430400  | -0.764338200 |
| O       | 4.949072400  | 1.927731500  | 3.709255000  |
| H       | 4.922895400  | 1.723046500  | 2.783659800  |
| H       | 4.136825200  | 2.382982700  | 3.884174100  |
| coord_2 |              |              |              |
| C       | 3.206287000  | -0.834176000 | 0.159858000  |
| C       | 3.078269000  | 0.572855000  | -0.038939000 |
| C       | 1.868461000  | 1.189714000  | -0.201535000 |
| C       | 0.821897000  | -0.974396000 | -0.055767000 |
| C       | 1.986421000  | -1.604499000 | 0.092340000  |



|         |              |              |              |
|---------|--------------|--------------|--------------|
| C       | 4.550384000  | -1.248139000 | 0.305429000  |
| C       | 5.455564000  | -0.216896000 | 0.226677000  |
| N       | 0.683136000  | 0.420666000  | -0.058079000 |
| H       | -0.095648000 | -1.521081000 | -0.147108000 |
| H       | 2.010102000  | -2.676680000 | 0.136154000  |
| H       | 4.843010000  | -2.268993000 | 0.462600000  |
| H       | 6.520510000  | -0.269624000 | 0.311524000  |
| S       | 1.756186000  | 2.961665000  | -0.542883000 |
| S       | 4.673140000  | 1.338224000  | -0.032780000 |
| C       | -0.643584000 | 1.024976000  | 0.086614000  |
| O       | -1.432577000 | 0.797341000  | -1.085647000 |
| C       | -1.450499000 | 0.492124000  | 1.247791000  |
| H       | -0.568728000 | 2.105389000  | 0.207602000  |
| C       | -2.809135000 | 0.735086000  | -0.683519000 |
| C       | -2.828653000 | 0.897139000  | 0.827647000  |
| H       | -1.149949000 | 0.921085000  | 2.207585000  |
| H       | -1.397787000 | -0.595662000 | 1.340375000  |
| H       | -3.328913000 | 1.582072000  | -1.137971000 |
| H       | -2.975885000 | 1.952007000  | 1.074542000  |
| C       | -3.437988000 | -0.548373000 | -1.221100000 |
| H       | -4.510675000 | -0.567150000 | -1.013920000 |
| H       | -3.292244000 | -0.620141000 | -2.302126000 |
| O       | -2.856952000 | -1.709326000 | -0.639354000 |
| H       | -2.835264000 | -1.554365000 | 0.320132000  |
| O       | -3.842422000 | 0.139915000  | 1.475961000  |
| H       | -3.642962000 | 0.168947000  | 2.426915000  |
| O       | 4.103643000  | 5.141824000  | -1.426270000 |
| H       | 4.287617000  | 4.510201000  | -2.107818000 |
| H       | 4.780167000  | 5.020595000  | -0.774411000 |
| O       | 4.952275000  | 1.966078000  | 3.703355000  |
| H       | 4.928184000  | 1.743804000  | 2.783125000  |
| H       | 4.139559000  | 2.423552000  | 3.867732000  |
| coord_3 |              |              |              |
| C       | 3.202296000  | -0.861753000 | 0.165792000  |
| C       | 3.085643000  | 0.549618000  | -0.029964000 |
| C       | 1.881252000  | 1.175787000  | -0.197622000 |
| C       | 0.817709000  | -0.980970000 | -0.063481000 |
| C       | 1.980328000  | -1.620753000 | 0.088821000  |
| C       | 4.542772000  | -1.285103000 | 0.317126000  |
| C       | 5.454138000  | -0.260305000 | 0.246633000  |
| N       | 0.690867000  | 0.414613000  | -0.060895000 |
| H       | -0.103021000 | -1.520965000 | -0.159933000 |

|         |              |              |              |
|---------|--------------|--------------|--------------|
| H       | 1.995222000  | -2.693231000 | 0.129128000  |
| H       | 4.827882000  | -2.308312000 | 0.472193000  |
| H       | 6.518188000  | -0.321066000 | 0.336757000  |
| S       | 1.784818000  | 2.939670000  | -0.539664000 |
| S       | 4.685979000  | 1.302341000  | -0.013922000 |
| C       | -0.632073000 | 1.025605000  | 0.082374000  |
| O       | -1.421479000 | 0.794050000  | -1.088627000 |
| C       | -1.440729000 | 0.502469000  | 1.246992000  |
| H       | -0.552323000 | 2.106233000  | 0.197212000  |
| C       | -2.797823000 | 0.740629000  | -0.686739000 |
| C       | -2.816759000 | 0.911923000  | 0.823447000  |
| H       | -1.138632000 | 0.935098000  | 2.204923000  |
| H       | -1.392539000 | -0.585111000 | 1.345501000  |
| H       | -3.312773000 | 1.587326000  | -1.146759000 |
| H       | -2.958121000 | 1.969308000  | 1.063761000  |
| C       | -3.432901000 | -0.542810000 | -1.217122000 |
| H       | -4.505479000 | -0.554773000 | -1.009086000 |
| H       | -3.288245000 | -0.621684000 | -2.297845000 |
| O       | -2.857484000 | -1.703340000 | -0.629196000 |
| H       | -2.834453000 | -1.542819000 | 0.329334000  |
| O       | -3.835674000 | 0.163671000  | 1.474061000  |
| H       | -3.636194000 | 0.192989000  | 2.424914000  |
| O       | 4.064053000  | 5.198392000  | -1.476530000 |
| H       | 4.272252000  | 4.516918000  | -2.100667000 |
| H       | 4.708412000  | 5.127265000  | -0.785846000 |
| O       | 4.955477000  | 2.004424000  | 3.697455000  |
| H       | 4.933451000  | 1.764313000  | 2.781665000  |
| H       | 4.142041000  | 2.464263000  | 3.851336000  |
| coord_4 |              |              |              |
| C       | 3.198304000  | -0.889331000 | 0.171726000  |
| C       | 3.093017000  | 0.526381000  | -0.020990000 |
| C       | 1.894042000  | 1.161861000  | -0.193709000 |
| C       | 0.813520000  | -0.987543000 | -0.071196000 |
| C       | 1.974236000  | -1.637007000 | 0.085303000  |
| C       | 4.535160000  | -1.322066000 | 0.328824000  |
| C       | 5.452712000  | -0.303713000 | 0.266588000  |
| N       | 0.698597000  | 0.408560000  | -0.063711000 |
| H       | -0.110343000 | -1.520783000 | -0.172772000 |
| H       | 1.980372000  | -2.709712000 | 0.122095000  |
| H       | 4.812741000  | -2.347584000 | 0.481761000  |
| H       | 6.515795000  | -0.372446000 | 0.362000000  |
| S       | 1.813451000  | 2.917674000  | -0.536445000 |

|         |              |              |              |
|---------|--------------|--------------|--------------|
| S       | 4.698818000  | 1.266458000  | 0.004937000  |
| C       | -0.620038000 | 1.028791000  | 0.077947000  |
| O       | -1.411210000 | 0.800592000  | -1.092853000 |
| C       | -1.430549000 | 0.509895000  | 1.242693000  |
| H       | -0.533557000 | 2.109000000  | 0.192486000  |
| C       | -2.787521000 | 0.750158000  | -0.690111000 |
| C       | -2.805034000 | 0.923208000  | 0.819457000  |
| H       | -1.126363000 | 0.942507000  | 2.199819000  |
| H       | -1.386429000 | -0.577725000 | 1.341928000  |
| H       | -3.300311000 | 1.598078000  | -1.150391000 |
| H       | -2.942749000 | 1.981409000  | 1.057680000  |
| C       | -3.426860000 | -0.532044000 | -1.218725000 |
| H       | -4.499816000 | -0.539486000 | -1.012466000 |
| H       | -3.281013000 | -0.612414000 | -2.299133000 |
| O       | -2.857264000 | -1.694798000 | -0.628838000 |
| H       | -2.832007000 | -1.533742000 | 0.329610000  |
| O       | -3.825045000 | 0.178877000  | 1.472785000  |
| H       | -3.627147000 | 0.215019000  | 2.423780000  |
| O       | 4.024463000  | 5.254961000  | -1.526790000 |
| H       | 4.256282000  | 4.526784000  | -2.086540000 |
| H       | 4.631868000  | 5.235898000  | -0.800155000 |
| O       | 4.958679000  | 2.042771000  | 3.691554000  |
| H       | 4.938731000  | 1.784881000  | 2.780564000  |
| H       | 4.144628000  | 2.504917000  | 3.834910000  |
| coord_5 |              |              |              |
| C       | 3.194313000  | -0.916909000 | 0.177660000  |
| C       | 3.100391000  | 0.503145000  | -0.012015000 |
| C       | 1.906833000  | 1.147934000  | -0.189796000 |
| C       | 0.809332000  | -0.994116000 | -0.078910000 |
| C       | 1.968143000  | -1.653262000 | 0.081784000  |
| C       | 4.527548000  | -1.359030000 | 0.340521000  |
| C       | 5.451287000  | -0.347121000 | 0.286543000  |
| N       | 0.706327000  | 0.402508000  | -0.066526000 |
| H       | -0.117605000 | -1.520611000 | -0.185594000 |
| H       | 1.965549000  | -2.726129000 | 0.115054000  |
| H       | 4.797584000  | -2.386808000 | 0.491333000  |
| H       | 6.513331000  | -0.423837000 | 0.387229000  |
| S       | 1.842083000  | 2.895679000  | -0.533227000 |
| S       | 4.711658000  | 1.230575000  | 0.023796000  |
| C       | -0.608809000 | 1.031016000  | 0.074683000  |
| O       | -1.401270000 | 0.807240000  | -1.096284000 |
| C       | -1.422543000 | 0.517214000  | 1.239566000  |

|         |              |              |              |
|---------|--------------|--------------|--------------|
| H       | -0.516008000 | 2.110912000  | 0.188759000  |
| C       | -2.777884000 | 0.761024000  | -0.693919000 |
| C       | -2.795209000 | 0.935440000  | 0.815362000  |
| H       | -1.117768000 | 0.950021000  | 2.196406000  |
| H       | -1.382562000 | -0.570497000 | 1.340506000  |
| H       | -3.288451000 | 1.609927000  | -1.154908000 |
| H       | -2.928754000 | 1.994360000  | 1.052795000  |
| C       | -3.420738000 | -0.519914000 | -1.221545000 |
| H       | -4.493891000 | -0.523952000 | -1.015873000 |
| H       | -3.274534000 | -0.602104000 | -2.301729000 |
| O       | -2.855149000 | -1.683674000 | -0.629986000 |
| H       | -2.830596000 | -1.521765000 | 0.328326000  |
| O       | -3.818522000 | 0.195532000  | 1.468577000  |
| H       | -3.620644000 | 0.231092000  | 2.419647000  |
| O       | 3.984873000  | 5.311529000  | -1.577050000 |
| H       | 4.239046000  | 4.541301000  | -2.066383000 |
| H       | 4.550886000  | 5.345635000  | -0.818256000 |
| O       | 4.961881000  | 2.081117000  | 3.685654000  |
| H       | 4.944020000  | 1.805527000  | 2.779817000  |
| H       | 4.147321000  | 2.545512000  | 3.818462000  |
| coord_6 |              |              |              |
| C       | 3.190321000  | -0.944486000 | 0.183594000  |
| C       | 3.107765000  | 0.479908000  | -0.003041000 |
| C       | 1.919623000  | 1.134008000  | -0.185883000 |
| C       | 0.805144000  | -1.000689000 | -0.086625000 |
| C       | 1.962050000  | -1.669516000 | 0.078265000  |
| C       | 4.519936000  | -1.395993000 | 0.352219000  |
| C       | 5.449861000  | -0.390529000 | 0.306499000  |
| N       | 0.714057000  | 0.396456000  | -0.069342000 |
| H       | -0.124818000 | -1.520403000 | -0.198392000 |
| H       | 1.950752000  | -2.742484000 | 0.108006000  |
| H       | 4.782385000  | -2.425989000 | 0.500898000  |
| H       | 6.510806000  | -0.475207000 | 0.412446000  |
| S       | 1.870715000  | 2.873684000  | -0.530008000 |
| S       | 4.724497000  | 1.194691000  | 0.042654000  |
| C       | -0.597718000 | 1.033159000  | 0.072240000  |
| O       | -1.391588000 | 0.814053000  | -1.099028000 |
| C       | -1.415044000 | 0.524208000  | 1.237386000  |
| H       | -0.498388000 | 2.112624000  | 0.185925000  |
| C       | -2.768664000 | 0.771505000  | -0.697567000 |
| C       | -2.786092000 | 0.947461000  | 0.811759000  |
| H       | -1.109703000 | 0.956930000  | 2.194069000  |

|         |              |              |              |
|---------|--------------|--------------|--------------|
| H       | -1.378988000 | -0.563450000 | 1.341245000  |
| H       | -3.277128000 | 1.620543000  | -1.160533000 |
| H       | -2.916439000 | 2.006802000  | 1.048802000  |
| C       | -3.415345000 | -0.507809000 | -1.224406000 |
| H       | -4.488302000 | -0.508807000 | -1.017577000 |
| H       | -3.270050000 | -0.592225000 | -2.304573000 |
| O       | -2.852632000 | -1.671808000 | -0.631553000 |
| H       | -2.830424000 | -1.508072000 | 0.326383000  |
| O       | -3.812247000 | 0.212720000  | 1.466042000  |
| H       | -3.612325000 | 0.248821000  | 2.416665000  |
| O       | 3.945283000  | 5.368098000  | -1.627310000 |
| H       | 4.219924000  | 4.561748000  | -2.041646000 |
| H       | 4.466083000  | 5.455503000  | -0.840907000 |
| O       | 4.965084000  | 2.119464000  | 3.679754000  |
| H       | 4.949317000  | 1.826273000  | 2.779421000  |
| H       | 4.150120000  | 2.586047000  | 3.801993000  |
| coord_7 |              |              |              |
| C       | 3.186330000  | -0.972064000 | 0.189528000  |
| C       | 3.115139000  | 0.456672000  | 0.005933000  |
| C       | 1.932414000  | 1.120081000  | -0.181970000 |
| C       | 0.800955000  | -1.007262000 | -0.094340000 |
| C       | 1.955958000  | -1.685771000 | 0.074747000  |
| C       | 4.512324000  | -1.432957000 | 0.363916000  |
| C       | 5.448436000  | -0.433938000 | 0.326454000  |
| N       | 0.721787000  | 0.390403000  | -0.072158000 |
| H       | -0.131972000 | -1.520173000 | -0.211186000 |
| H       | 1.935985000  | -2.758776000 | 0.100955000  |
| H       | 4.767190000  | -2.465118000 | 0.510449000  |
| H       | 6.508212000  | -0.526578000 | 0.437659000  |
| S       | 1.899347000  | 2.851689000  | -0.526789000 |
| S       | 4.737337000  | 1.158808000  | 0.061513000  |
| C       | -0.585607000 | 1.035484000  | 0.069337000  |
| O       | -1.381706000 | 0.819845000  | -1.101160000 |
| C       | -1.403956000 | 0.531103000  | 1.235554000  |
| H       | -0.479680000 | 2.114499000  | 0.181690000  |
| C       | -2.758352000 | 0.782363000  | -0.698284000 |
| C       | -2.773659000 | 0.959352000  | 0.810708000  |
| H       | -1.094982000 | 0.963063000  | 2.191583000  |
| H       | -1.372359000 | -0.556614000 | 1.339534000  |
| H       | -3.264046000 | 1.633425000  | -1.160753000 |
| H       | -2.898684000 | 2.019404000  | 1.046914000  |
| C       | -3.410405000 | -0.494909000 | -1.224260000 |

|         |              |              |              |
|---------|--------------|--------------|--------------|
| H       | -4.483508000 | -0.490709000 | -1.018532000 |
| H       | -3.264425000 | -0.579831000 | -2.304324000 |
| O       | -2.854520000 | -1.662222000 | -0.631016000 |
| H       | -2.827668000 | -1.498379000 | 0.326909000  |
| O       | -3.803364000 | 0.229708000  | 1.465155000  |
| H       | -3.604932000 | 0.266540000  | 2.415957000  |
| O       | 3.905693000  | 5.424666000  | -1.677569000 |
| H       | 4.198417000  | 4.589005000  | -2.014147000 |
| H       | 4.378304000  | 5.564506000  | -0.868629000 |
| O       | 4.968286000  | 2.157810000  | 3.673854000  |
| H       | 4.954619000  | 1.847139000  | 2.779367000  |
| H       | 4.153024000  | 2.626522000  | 3.785508000  |
| coord_8 |              |              |              |
| C       | 3.182338000  | -0.999641000 | 0.195462000  |
| C       | 3.122513000  | 0.433435000  | 0.014908000  |
| C       | 1.945205000  | 1.106155000  | -0.178057000 |
| C       | 0.796767000  | -1.013835000 | -0.102054000 |
| C       | 1.949865000  | -1.702025000 | 0.071228000  |
| C       | 4.504712000  | -1.469920000 | 0.375614000  |
| C       | 5.447010000  | -0.477346000 | 0.346409000  |
| N       | 0.729518000  | 0.384350000  | -0.074974000 |
| H       | -0.139065000 | -1.519926000 | -0.223963000 |
| H       | 1.921247000  | -2.775007000 | 0.093902000  |
| H       | 4.751984000  | -2.504197000 | 0.519996000  |
| H       | 6.505550000  | -0.577932000 | 0.462855000  |
| S       | 1.927980000  | 2.829694000  | -0.523571000 |
| S       | 4.750176000  | 1.122925000  | 0.080372000  |
| C       | -0.573568000 | 1.037942000  | 0.066576000  |
| O       | -1.370920000 | 0.826388000  | -1.103945000 |
| C       | -1.394582000 | 0.538127000  | 1.232660000  |
| H       | -0.461005000 | 2.116355000  | 0.179837000  |
| C       | -2.747776000 | 0.793147000  | -0.701326000 |
| C       | -2.762332000 | 0.971772000  | 0.807404000  |
| H       | -1.083669000 | 0.970214000  | 2.187848000  |
| H       | -1.367724000 | -0.549615000 | 1.338167000  |
| H       | -3.250149000 | 1.645491000  | -1.164677000 |
| H       | -2.883018000 | 2.032909000  | 1.041470000  |
| C       | -3.404485000 | -0.481900000 | -1.227103000 |
| H       | -4.478033000 | -0.474135000 | -1.023081000 |
| H       | -3.257977000 | -0.568453000 | -2.306874000 |
| O       | -2.852707000 | -1.650438000 | -0.632639000 |
| H       | -2.826709000 | -1.485834000 | 0.325109000  |

|         |              |              |              |
|---------|--------------|--------------|--------------|
| O       | -3.794541000 | 0.246079000  | 1.462941000  |
| H       | -3.596203000 | 0.282577000  | 2.413892000  |
| O       | 3.866103000  | 5.481234000  | -1.727829000 |
| H       | 4.174210000  | 4.623450000  | -1.985857000 |
| H       | 4.288540000  | 5.671712000  | -0.901653000 |
| O       | 4.971488000  | 2.196156000  | 3.667953000  |
| H       | 4.959924000  | 1.868144000  | 2.779650000  |
| H       | 4.156035000  | 2.666935000  | 3.769011000  |
| coord_9 |              |              |              |
| C       | 3.178347000  | -1.027219000 | 0.201396000  |
| C       | 3.129887000  | 0.410199000  | 0.023882000  |
| C       | 1.957995000  | 1.092228000  | -0.174144000 |
| C       | 0.792579000  | -1.020408000 | -0.109769000 |
| C       | 1.943772000  | -1.718279000 | 0.067710000  |
| C       | 4.497100000  | -1.506884000 | 0.387311000  |
| C       | 5.445584000  | -0.520754000 | 0.366365000  |
| N       | 0.737248000  | 0.378298000  | -0.077790000 |
| H       | -0.146102000 | -1.519657000 | -0.236731000 |
| H       | 1.906535000  | -2.791176000 | 0.086856000  |
| H       | 4.736882000  | -2.543200000 | 0.529530000  |
| H       | 6.502823000  | -0.629268000 | 0.488040000  |
| S       | 1.956612000  | 2.807699000  | -0.520352000 |
| S       | 4.763016000  | 1.087042000  | 0.099230000  |
| C       | -0.562628000 | 1.040613000  | 0.059349000  |
| O       | -1.357557000 | 0.833412000  | -1.113876000 |
| C       | -1.391213000 | 0.548442000  | 1.223989000  |
| H       | -0.443060000 | 2.118327000  | 0.171154000  |
| C       | -2.735906000 | 0.802143000  | -0.716270000 |
| C       | -2.756395000 | 0.984640000  | 0.791792000  |
| H       | -1.083715000 | 0.983397000  | 2.179000000  |
| H       | -1.367739000 | -0.538878000 | 1.334643000  |
| H       | -3.236551000 | 1.652929000  | -1.184506000 |
| H       | -2.875828000 | 2.046554000  | 1.023045000  |
| C       | -3.391153000 | -0.474677000 | -1.239630000 |
| H       | -4.465372000 | -0.464436000 | -1.039953000 |
| H       | -3.239900000 | -0.566584000 | -2.318376000 |
| O       | -2.844493000 | -1.641096000 | -0.636405000 |
| H       | -2.823157000 | -1.471338000 | 0.320591000  |
| O       | -3.793849000 | 0.263492000  | 1.444108000  |
| H       | -3.599357000 | 0.300265000  | 2.395751000  |
| O       | 3.826513000  | 5.537803000  | -1.778089000 |
| H       | 4.147185000  | 4.664955000  | -1.958667000 |

|          |              |              |              |
|----------|--------------|--------------|--------------|
| H        | 4.197835000  | 5.776333000  | -0.939921000 |
| O        | 4.974691000  | 2.234503000  | 3.662053000  |
| H        | 4.965229000  | 1.889308000  | 2.780260000  |
| H        | 4.159152000  | 2.707286000  | 3.752508000  |
| coord_10 |              |              |              |
| C        | 3.174355300  | -1.054796600 | 0.207329700  |
| C        | 3.137261500  | 0.386962200  | 0.032856600  |
| C        | 1.970785800  | 1.078301900  | -0.170230500 |
| C        | 0.788390500  | -1.026981100 | -0.117483300 |
| C        | 1.937679800  | -1.734533700 | 0.064191300  |
| C        | 4.489488300  | -1.543847700 | 0.399008800  |
| C        | 5.444158600  | -0.564162400 | 0.386319900  |
| N        | 0.744977900  | 0.372245400  | -0.080605500 |
| H        | -0.153163200 | -1.519310600 | -0.249173400 |
| H        | 1.892078100  | -2.807277200 | 0.080628900  |
| H        | 4.722033900  | -2.582130500 | 0.538808300  |
| H        | 6.500023400  | -0.680605500 | 0.513299500  |
| S        | 1.985244400  | 2.785703600  | -0.517133500 |
| S        | 4.775855000  | 1.051158500  | 0.118089000  |
| C        | -0.551124600 | 1.042730900  | 0.055100400  |
| O        | -1.347180100 | 0.838356300  | -1.118190400 |
| C        | -1.382954400 | 0.557391500  | 1.220353600  |
| H        | -0.424946500 | 2.119743700  | 0.165002600  |
| C        | -2.725782600 | 0.811712800  | -0.721019600 |
| C        | -2.746502400 | 0.997436300  | 0.786552600  |
| H        | -1.074553500 | 0.993852300  | 2.174445100  |
| H        | -1.363398800 | -0.529702800 | 1.334213300  |
| H        | -3.223950500 | 1.662912700  | -1.191416100 |
| H        | -2.862863700 | 2.060179000  | 1.015480500  |
| C        | -3.384984400 | -0.464287000 | -1.242002400 |
| H        | -4.459253800 | -0.449952800 | -1.043120700 |
| H        | -3.233210600 | -0.559168700 | -2.320333500 |
| O        | -2.843039200 | -1.631235500 | -0.635682200 |
| H        | -2.821372300 | -1.459305200 | 0.320930000  |
| O        | -3.786799300 | 0.280865300  | 1.439607400  |
| H        | -3.593197200 | 0.319082200  | 2.391338200  |
| O        | 3.786923500  | 5.594371200  | -1.828349100 |
| H        | 4.117401800  | 4.713002700  | -1.934186200 |
| H        | 4.107166900  | 5.877756300  | -0.983178400 |
| O        | 4.977892800  | 2.272849300  | 3.656153000  |
| H        | 4.970521600  | 1.910113000  | 2.779893200  |
| H        | 4.162459900  | 2.747523800  | 3.735991900  |



T<sub>2</sub>(<sup>3</sup>nπ\*) minimum to <sup>3</sup>nπ\*/<sup>3</sup>ππ\*

coord\_1

|   |              |              |              |
|---|--------------|--------------|--------------|
| C | 3.221740900  | -0.808990200 | 0.204430100  |
| C | 3.113421900  | 0.587094200  | -0.038355000 |
| C | 1.906813500  | 1.211761300  | -0.226081100 |
| C | 0.830162200  | -0.938956300 | -0.027452000 |
| C | 2.007273600  | -1.576937400 | 0.139797000  |
| C | 4.569816300  | -1.241635300 | 0.349764100  |
| C | 5.480717500  | -0.233284100 | 0.232963100  |
| N | 0.705520200  | 0.468764100  | -0.013726000 |
| H | -0.091794000 | -1.475311400 | -0.126363000 |
| H | 2.028600600  | -2.649344700 | 0.181429100  |
| H | 4.847699400  | -2.262269600 | 0.531686100  |
| H | 6.545794800  | -0.296667100 | 0.311845100  |
| S | 1.766319500  | 2.947419800  | -0.604695200 |
| S | 4.722333300  | 1.327494400  | -0.068464000 |
| C | -0.608287200 | 1.089436300  | 0.159376000  |
| O | -1.398754400 | 0.918012300  | -1.021238300 |
| C | -1.423850400 | 0.530180100  | 1.302531400  |
| H | -0.511207100 | 2.162202600  | 0.322662100  |
| C | -2.775156800 | 0.845536200  | -0.623356200 |
| C | -2.795919800 | 0.964284300  | 0.891388200  |
| H | -1.121529300 | 0.926898300  | 2.275858600  |
| H | -1.383630400 | -0.560095200 | 1.364226400  |
| H | -3.291707900 | 1.705832500  | -1.055573300 |
| H | -2.930720800 | 2.013612600  | 1.167662300  |
| C | -3.405353000 | -0.421058100 | -1.198545300 |
| H | -4.478988300 | -0.441126100 | -0.996703300 |
| H | -3.254967900 | -0.463751100 | -2.280472600 |
| O | -2.832308800 | -1.600333400 | -0.646499200 |
| H | -2.812528800 | -1.471213400 | 0.316828100  |
| O | -3.820591100 | 0.200772100  | 1.514288400  |
| H | -3.622925000 | 0.198681100  | 2.466089700  |
| O | 4.047073100  | 4.798969300  | -1.092271300 |
| H | 4.295292200  | 4.425816200  | -1.928017500 |
| H | 4.834617400  | 4.784014300  | -0.562816200 |
| O | 4.914975400  | 2.011749600  | 3.697273000  |
| H | 4.934319400  | 1.745086500  | 2.787228800  |
| H | 4.064828100  | 2.413207700  | 3.816627100  |

coord\_2

|   |             |              |              |
|---|-------------|--------------|--------------|
| C | 3.215991000 | -0.836141000 | 0.204406000  |
| C | 3.115604000 | 0.565014000  | -0.030827000 |

|         |              |              |              |
|---------|--------------|--------------|--------------|
| C       | 1.913463000  | 1.197099000  | -0.220271000 |
| C       | 0.825034000  | -0.948553000 | -0.037788000 |
| C       | 1.999046000  | -1.594275000 | 0.131076000  |
| C       | 4.560400000  | -1.275066000 | 0.354895000  |
| C       | 5.476178000  | -0.269913000 | 0.249630000  |
| N       | 0.709436000  | 0.458225000  | -0.021526000 |
| H       | -0.098159000 | -1.482453000 | -0.139875000 |
| H       | 2.013906000  | -2.666967000 | 0.170084000  |
| H       | 4.831771000  | -2.298445000 | 0.532526000  |
| H       | 6.540320000  | -0.341001000 | 0.333988000  |
| S       | 1.790206000  | 2.929608000  | -0.595408000 |
| S       | 4.727823000  | 1.296927000  | -0.048148000 |
| C       | -0.606628000 | 1.079650000  | 0.134167000  |
| O       | -1.396570000 | 0.876601000  | -1.042297000 |
| C       | -1.419917000 | 0.539227000  | 1.287451000  |
| H       | -0.515317000 | 2.156679000  | 0.273167000  |
| C       | -2.773276000 | 0.810061000  | -0.643408000 |
| C       | -2.794466000 | 0.957144000  | 0.868799000  |
| H       | -1.119006000 | 0.956115000  | 2.252523000  |
| H       | -1.374327000 | -0.549705000 | 1.369552000  |
| H       | -3.290219000 | 1.662443000  | -1.090581000 |
| H       | -2.935084000 | 2.010713000  | 1.125002000  |
| C       | -3.404344000 | -0.466822000 | -1.195150000 |
| H       | -4.477588000 | -0.484125000 | -0.990658000 |
| H       | -3.255447000 | -0.529049000 | -2.276357000 |
| O       | -2.830210000 | -1.635516000 | -0.622657000 |
| H       | -2.808215000 | -1.487964000 | 0.337938000  |
| O       | -3.813914000 | 0.199511000  | 1.507467000  |
| H       | -3.619731000 | 0.223799000  | 2.459632000  |
| O       | 4.017759000  | 4.887445000  | -1.174586000 |
| H       | 4.286919000  | 4.438094000  | -1.963850000 |
| H       | 4.769098000  | 4.906046000  | -0.598006000 |
| O       | 4.921547000  | 2.040990000  | 3.692258000  |
| H       | 4.937912000  | 1.763628000  | 2.785977000  |
| H       | 4.075263000  | 2.450596000  | 3.807214000  |
| coord_3 |              |              |              |
| C       | 3.210240000  | -0.863293000 | 0.204382000  |
| C       | 3.117785000  | 0.542933000  | -0.023299000 |
| C       | 1.920111000  | 1.182437000  | -0.214461000 |
| C       | 0.819906000  | -0.958150000 | -0.048123000 |
| C       | 1.990818000  | -1.611612000 | 0.122356000  |
| C       | 4.550984000  | -1.308497000 | 0.360026000  |

|   |              |              |              |
|---|--------------|--------------|--------------|
| C | 5.471638000  | -0.306542000 | 0.266296000  |
| N | 0.713353000  | 0.447686000  | -0.029327000 |
| H | -0.105685000 | -1.486934000 | -0.153948000 |
| H | 1.998014000  | -2.684474000 | 0.158525000  |
| H | 4.817373000  | -2.333901000 | 0.532995000  |
| H | 6.534905000  | -0.383252000 | 0.355985000  |
| S | 1.814093000  | 2.911797000  | -0.586121000 |
| S | 4.733312000  | 1.266360000  | -0.027832000 |
| C | -0.599233000 | 1.076390000  | 0.130422000  |
| O | -1.390405000 | 0.885000000  | -1.046980000 |
| C | -1.416371000 | 0.536458000  | 1.281864000  |
| H | -0.501450000 | 2.152283000  | 0.274229000  |
| C | -2.767532000 | 0.825773000  | -0.648555000 |
| C | -2.787878000 | 0.966260000  | 0.864260000  |
| H | -1.113536000 | 0.946927000  | 2.249154000  |
| H | -1.378433000 | -0.553073000 | 1.359744000  |
| H | -3.279738000 | 1.682608000  | -1.092820000 |
| H | -2.921228000 | 2.019416000  | 1.125838000  |
| C | -3.406195000 | -0.445183000 | -1.204784000 |
| H | -4.479535000 | -0.456572000 | -1.000433000 |
| H | -3.258352000 | -0.504695000 | -2.286199000 |
| O | -2.838472000 | -1.619005000 | -0.636062000 |
| H | -2.817559000 | -1.475422000 | 0.325126000  |
| O | -3.813486000 | 0.212541000  | 1.497740000  |
| H | -3.615316000 | 0.222136000  | 2.449245000  |
| O | 3.988444000  | 4.975921000  | -1.256901000 |
| H | 4.277817000  | 4.448044000  | -1.988277000 |
| H | 4.699503000  | 5.029355000  | -0.633329000 |
| O | 4.928118000  | 2.070230000  | 3.687242000  |
| H | 4.941505000  | 1.782170000  | 2.784725000  |
| H | 4.085512000  | 2.488077000  | 3.797824000  |

coord\_4

|   |              |              |              |
|---|--------------|--------------|--------------|
| C | 3.204490000  | -0.890444000 | 0.204359000  |
| C | 3.119967000  | 0.520853000  | -0.015771000 |
| C | 1.926760000  | 1.167774000  | -0.208652000 |
| C | 0.814778000  | -0.967747000 | -0.058458000 |
| C | 1.982590000  | -1.628950000 | 0.113635000  |
| C | 4.541568000  | -1.341928000 | 0.365156000  |
| C | 5.467098000  | -0.343172000 | 0.282963000  |
| N | 0.717269000  | 0.437147000  | -0.037127000 |
| H | -0.113186000 | -1.491377000 | -0.168010000 |
| H | 1.982129000  | -2.701940000 | 0.146942000  |

|         |              |              |              |
|---------|--------------|--------------|--------------|
| H       | 4.803121000  | -2.369290000 | 0.533383000  |
| H       | 6.529445000  | -0.425514000 | 0.377975000  |
| S       | 1.837979000  | 2.893985000  | -0.576833000 |
| S       | 4.738801000  | 1.235793000  | -0.007517000 |
| C       | -0.592830000 | 1.072158000  | 0.119835000  |
| O       | -1.384974000 | 0.880048000  | -1.057123000 |
| C       | -1.412069000 | 0.538709000  | 1.272764000  |
| H       | -0.490853000 | 2.148281000  | 0.259487000  |
| C       | -2.762216000 | 0.825061000  | -0.658438000 |
| C       | -2.782319000 | 0.970075000  | 0.853906000  |
| H       | -1.108933000 | 0.952300000  | 2.238590000  |
| H       | -1.377079000 | -0.550702000 | 1.355106000  |
| H       | -3.272006000 | 1.682022000  | -1.105197000 |
| H       | -2.912847000 | 2.024328000  | 1.112261000  |
| C       | -3.404313000 | -0.446208000 | -1.210383000 |
| H       | -4.477751000 | -0.453965000 | -1.006440000 |
| H       | -3.256409000 | -0.509627000 | -2.291603000 |
| O       | -2.840578000 | -1.619922000 | -0.637495000 |
| H       | -2.818688000 | -1.473236000 | 0.323364000  |
| O       | -3.809273000 | 0.221097000  | 1.490739000  |
| H       | -3.610745000 | 0.234878000  | 2.442123000  |
| O       | 3.959130000  | 5.064396000  | -1.339215000 |
| H       | 4.266530000  | 4.459213000  | -1.999942000 |
| H       | 4.624470000  | 5.153431000  | -0.670862000 |
| O       | 4.934689000  | 2.099470000  | 3.682227000  |
| H       | 4.945097000  | 1.800712000  | 2.783474000  |
| H       | 4.095679000  | 2.525603000  | 3.788444000  |
| coord_5 |              |              |              |
| C       | 3.198740000  | -0.917595000 | 0.204335000  |
| C       | 3.122149000  | 0.498772000  | -0.008243000 |
| C       | 1.933409000  | 1.153112000  | -0.202842000 |
| C       | 0.809650000  | -0.977344000 | -0.068794000 |
| C       | 1.974362000  | -1.646287000 | 0.104914000  |
| C       | 4.532152000  | -1.375359000 | 0.370287000  |
| C       | 5.462559000  | -0.379801000 | 0.299629000  |
| N       | 0.721185000  | 0.426608000  | -0.044928000 |
| H       | -0.120661000 | -1.495788000 | -0.182070000 |
| H       | 1.966270000  | -2.719350000 | 0.135345000  |
| H       | 4.788750000  | -2.404657000 | 0.533865000  |
| H       | 6.523941000  | -0.467805000 | 0.399966000  |
| S       | 1.861866000  | 2.876174000  | -0.567546000 |
| S       | 4.744290000  | 1.205226000  | 0.012799000  |

|         |               |              |              |
|---------|---------------|--------------|--------------|
| C       | -0.586870000  | 1.067099000  | 0.108195000  |
| O       | -1.381160000  | 0.870626000  | -1.066939000 |
| C       | -1.405714000  | 0.541190000  | 1.264446000  |
| H       | -0.482118000  | 2.143740000  | 0.241701000  |
| C       | -2.758059000  | 0.819814000  | -0.666140000 |
| C       | -2.775869000  | 0.973353000  | 0.845315000  |
| H       | -1.099191000  | 0.958899000  | 2.227326000  |
| H       | -1.371838000  | -0.547805000 | 1.352116000  |
| H       | -3.267588000  | 1.675305000  | -1.115919000 |
| H       | -2.903785000  | 2.029425000  | 1.098109000  |
| C       | -3.403550000  | -0.452449000 | -1.212382000 |
| H       | -4.476925000  | -0.457407000 | -1.007807000 |
| H       | -3.256402000  | -0.520578000 | -2.293375000 |
| O       | -2.841780000  | -1.625329000 | -0.636147000 |
| H       | -2.818843000  | -1.475464000 | 0.324079000  |
| O       | -3.803981000  | 0.230068000  | 1.486771000  |
| H       | -3.607696000  | 0.252720000  | 2.438559000  |
| O       | 3.929815000   | 5.152872000  | -1.421530000 |
| H       | 4.251879000   | 4.475265000  | -1.999824000 |
| H       | 4.544469000   | 5.277643000  | -0.711647000 |
| O       | 4.941260000   | 2.128710000  | 3.677212000  |
| H       | 4.948690000   | 1.819254000  | 2.782222000  |
| H       | 4.105943000   | 2.563087000  | 3.779049000  |
| coord_6 |               |              |              |
| C       | 3.192989000   | -0.944747000 | 0.204311000  |
| C       | 3.124331000   | 0.476691000  | -0.000715000 |
| C       | 1.940058000   | 1.138450000  | -0.197032000 |
| C       | 0.804521000   | -0.986940000 | -0.079130000 |
| C       | 1.966134000   | -1.663625000 | 0.096194000  |
| C       | 4.522736000   | -1.408790000 | 0.375418000  |
| C       | 5.458019000   | -0.416430000 | 0.316296000  |
| N       | 0.725101000   | 0.416069000  | -0.052728000 |
| H       | -0.128166000  | -1.500044000 | -0.196173000 |
| H       | 1.950432000   | -2.736717000 | 0.123740000  |
| H       | 4.774380000   | -2.439986000 | 0.534327000  |
| H       | 6.518390000   | -0.510105000 | 0.421952000  |
| S       | 1.885752000   | 2.858362000  | -0.558259000 |
| S       | 4.749779000   | 1.174658000  | 0.033115000  |
| C       | -0.580158000  | 1.062713000  | 0.097865000  |
| O       | -1.375388000  | 0.864923000  | -1.076334000 |
| C       | -1.400169000  | 0.543752000  | 1.256183000  |
| H       | -0.4711477000 | 2.139507000  | 0.227443000  |

|         |              |              |              |
|---------|--------------|--------------|--------------|
| C       | -2.752308000 | 0.819434000  | -0.675183000 |
| C       | -2.768995000 | 0.978023000  | 0.835765000  |
| H       | -1.092152000 | 0.964083000  | 2.217530000  |
| H       | -1.369283000 | -0.545122000 | 1.347027000  |
| H       | -3.259132000 | 1.675167000  | -1.127549000 |
| H       | -2.893887000 | 2.035302000  | 1.084766000  |
| C       | -3.401813000 | -0.452513000 | -1.217273000 |
| H       | -4.475275000 | -0.452791000 | -1.013084000 |
| H       | -3.254658000 | -0.525069000 | -2.298005000 |
| O       | -2.844522000 | -1.625592000 | -0.636986000 |
| H       | -2.820674000 | -1.472806000 | 0.322752000  |
| O       | -3.798755000 | 0.239545000  | 1.480391000  |
| H       | -3.602285000 | 0.265717000  | 2.431951000  |
| O       | 3.900501000  | 5.241348000  | -1.503845000 |
| H       | 4.232945000  | 4.499736000  | -1.990460000 |
| H       | 4.460269000  | 5.401314000  | -0.756602000 |
| O       | 4.947831000  | 2.157950000  | 3.672197000  |
| H       | 4.952282000  | 1.837796000  | 2.780970000  |
| H       | 4.116301000  | 2.600523000  | 3.769641000  |
| coord_7 |              |              |              |
| C       | 3.187239000  | -0.971898000 | 0.204288000  |
| C       | 3.126512000  | 0.454611000  | 0.006813000  |
| C       | 1.946707000  | 1.123787000  | -0.191222000 |
| C       | 0.799393000  | -0.996537000 | -0.089465000 |
| C       | 1.957906000  | -1.680962000 | 0.087473000  |
| C       | 4.513320000  | -1.442221000 | 0.380549000  |
| C       | 5.453479000  | -0.453059000 | 0.332963000  |
| N       | 0.729017000  | 0.405530000  | -0.060528000 |
| H       | -0.135553000 | -1.504453000 | -0.210230000 |
| H       | 1.934596000  | -2.754030000 | 0.112122000  |
| H       | 4.760022000  | -2.475267000 | 0.534802000  |
| H       | 6.512793000  | -0.552422000 | 0.443926000  |
| S       | 1.909639000  | 2.840551000  | -0.548971000 |
| S       | 4.755268000  | 1.144091000  | 0.053431000  |
| C       | -0.574379000 | 1.058040000  | 0.090308000  |
| O       | -1.371681000 | 0.860595000  | -1.082733000 |
| C       | -1.397355000 | 0.546925000  | 1.250908000  |
| H       | -0.460576000 | 2.134789000  | 0.216342000  |
| C       | -2.748816000 | 0.819806000  | -0.681160000 |
| C       | -2.765679000 | 0.983419000  | 0.829154000  |
| H       | -1.088769000 | 0.970456000  | 2.210667000  |
| H       | -1.370054000 | -0.541684000 | 1.346523000  |

|         |              |              |              |
|---------|--------------|--------------|--------------|
| H       | -3.252770000 | 1.675404000  | -1.136867000 |
| H       | -2.889054000 | 2.041873000  | 1.073920000  |
| C       | -3.402355000 | -0.452216000 | -1.218449000 |
| H       | -4.475375000 | -0.449553000 | -1.012197000 |
| H       | -3.256809000 | -0.528749000 | -2.299151000 |
| O       | -2.848078000 | -1.624622000 | -0.634319000 |
| H       | -2.822962000 | -1.467267000 | 0.324644000  |
| O       | -3.798300000 | 0.250159000  | 1.475889000  |
| H       | -3.601194000 | 0.275373000  | 2.427399000  |
| O       | 3.871186000  | 5.329823000  | -1.586160000 |
| H       | 4.209292000  | 4.535279000  | -1.975628000 |
| H       | 4.372892000  | 5.523785000  | -0.806434000 |
| O       | 4.954402000  | 2.187190000  | 3.667181000  |
| H       | 4.955875000  | 1.856338000  | 2.779719000  |
| H       | 4.126753000  | 2.637911000  | 3.760222000  |
| coord_8 |              |              |              |
| C       | 3.181489000  | -0.999049000 | 0.204264000  |
| C       | 3.128694000  | 0.432530000  | 0.014341000  |
| C       | 1.953356000  | 1.109125000  | -0.185413000 |
| C       | 0.794265000  | -1.006134000 | -0.099801000 |
| C       | 1.949679000  | -1.698300000 | 0.078752000  |
| C       | 4.503905000  | -1.475653000 | 0.385679000  |
| C       | 5.448939000  | -0.489689000 | 0.349629000  |
| N       | 0.732934000  | 0.394991000  | -0.068329000 |
| H       | -0.142910000 | -1.508857000 | -0.224264000 |
| H       | 1.918808000  | -2.771303000 | 0.100490000  |
| H       | 4.745864000  | -2.510462000 | 0.535286000  |
| H       | 6.507151000  | -0.594753000 | 0.465898000  |
| S       | 1.933525000  | 2.822739000  | -0.539684000 |
| S       | 4.760757000  | 1.113524000  | 0.073746000  |
| C       | -0.567082000 | 1.053668000  | 0.077737000  |
| O       | -1.364836000 | 0.853762000  | -1.094642000 |
| C       | -1.390464000 | 0.548698000  | 1.240111000  |
| H       | -0.449526000 | 2.130732000  | 0.198688000  |
| C       | -2.741852000 | 0.818645000  | -0.692726000 |
| C       | -2.757054000 | 0.987936000  | 0.817025000  |
| H       | -1.079613000 | 0.974074000  | 2.198252000  |
| H       | -1.365915000 | -0.539696000 | 1.339330000  |
| H       | -3.243993000 | 1.673938000  | -1.150929000 |
| H       | -2.875564000 | 2.047684000  | 1.058570000  |
| C       | -3.399338000 | -0.452968000 | -1.225846000 |
| H       | -4.472806000 | -0.445394000 | -1.021752000 |

|         |              |              |              |
|---------|--------------|--------------|--------------|
| H       | -3.252564000 | -0.533690000 | -2.306083000 |
| O       | -2.849516000 | -1.625678000 | -0.637698000 |
| H       | -2.824457000 | -1.466504000 | 0.320976000  |
| O       | -3.791382000 | 0.260110000  | 1.466419000  |
| H       | -3.594413000 | 0.290501000  | 2.417826000  |
| O       | 3.841872000  | 5.418299000  | -1.668474000 |
| H       | 4.181064000  | 4.583138000  | -1.959605000 |
| H       | 4.283516000  | 5.644474000  | -0.861568000 |
| O       | 4.960974000  | 2.216431000  | 3.662166000  |
| H       | 4.959468000  | 1.874880000  | 2.778467000  |
| H       | 4.137298000  | 2.675247000  | 3.750794000  |
| coord_9 |              |              |              |
| C       | 3.175738000  | -1.026200000 | 0.204240000  |
| C       | 3.130876000  | 0.410450000  | 0.021869000  |
| C       | 1.960005000  | 1.094462000  | -0.179603000 |
| C       | 0.789137000  | -1.015731000 | -0.110136000 |
| C       | 1.941451000  | -1.715637000 | 0.070031000  |
| C       | 4.494489000  | -1.509084000 | 0.390810000  |
| C       | 5.444400000  | -0.526318000 | 0.366296000  |
| N       | 0.736850000  | 0.384452000  | -0.076129000 |
| H       | -0.150238000 | -1.513249000 | -0.238285000 |
| H       | 1.903038000  | -2.788531000 | 0.088849000  |
| H       | 4.731491000  | -2.545672000 | 0.535751000  |
| H       | 6.501461000  | -0.637099000 | 0.487861000  |
| S       | 1.957412000  | 2.804928000  | -0.530397000 |
| S       | 4.766247000  | 1.082957000  | 0.094062000  |
| C       | -0.561284000 | 1.049814000  | 0.063473000  |
| O       | -1.356672000 | 0.848533000  | -1.110511000 |
| C       | -1.391115000 | 0.556151000  | 1.226596000  |
| H       | -0.438837000 | 2.126808000  | 0.179134000  |
| C       | -2.735109000 | 0.817136000  | -0.713136000 |
| C       | -2.755570000 | 0.995639000  | 0.795325000  |
| H       | -1.083105000 | 0.988392000  | 2.182671000  |
| H       | -1.369344000 | -0.531432000 | 1.334785000  |
| H       | -3.235258000 | 1.669419000  | -1.179219000 |
| H       | -2.873568000 | 2.057109000  | 1.029375000  |
| C       | -3.391256000 | -0.457863000 | -1.239877000 |
| H       | -4.465531000 | -0.447280000 | -1.040485000 |
| H       | -3.239757000 | -0.547156000 | -2.318790000 |
| O       | -2.845793000 | -1.626255000 | -0.639392000 |
| H       | -2.824339000 | -1.458766000 | 0.317978000  |
| O       | -3.794229000 | 0.274220000  | 1.445431000  |



|          |              |              |              |
|----------|--------------|--------------|--------------|
| H        | -3.599940000 | 0.308221000  | 2.397197000  |
| O        | 3.812557000  | 5.506775000  | -1.750789000 |
| H        | 4.148877000  | 4.643087000  | -1.946322000 |
| H        | 4.193363000  | 5.762922000  | -0.922129000 |
| O        | 4.967545000  | 2.245671000  | 3.657151000  |
| H        | 4.963060000  | 1.893422000  | 2.777215000  |
| H        | 4.147934000  | 2.712528000  | 3.741357000  |
| coord_10 |              |              |              |
| C        | 3.169987900  | -1.053351700 | 0.204216300  |
| C        | 3.133057700  | 0.388369400  | 0.029396700  |
| C        | 1.966653900  | 1.079800200  | -0.173793000 |
| C        | 0.784008500  | -1.025327900 | -0.120471500 |
| C        | 1.933222800  | -1.732974700 | 0.061310600  |
| C        | 4.485072700  | -1.542514500 | 0.395940900  |
| C        | 5.439860000  | -0.562947000 | 0.382962400  |
| N        | 0.740766100  | 0.373912700  | -0.083929600 |
| H        | -0.157611600 | -1.517576100 | -0.251990500 |
| H        | 1.887493000  | -2.805708700 | 0.078010000  |
| H        | 4.717501200  | -2.580791400 | 0.535978500  |
| H        | 6.495717900  | -0.679486300 | 0.509911700  |
| S        | 1.981298500  | 2.787116200  | -0.521109600 |
| S        | 4.771735800  | 1.052389300  | 0.114377900  |
| C        | -0.555248300 | 1.044586700  | 0.051685800  |
| O        | -1.351393200 | 0.840024200  | -1.121511500 |
| C        | -1.387072000 | 0.559629100  | 1.217102300  |
| H        | -0.428934700 | 2.121610900  | 0.161320800  |
| C        | -2.729977000 | 0.813642400  | -0.724258100 |
| C        | -2.750591100 | 0.999732900  | 0.783270300  |
| H        | -1.078565800 | 0.996283400  | 2.171071200  |
| H        | -1.367640700 | -0.527440000 | 1.331223800  |
| H        | -3.228068600 | 1.664788500  | -1.194832700 |
| H        | -2.866812000 | 2.062544800  | 1.011947800  |
| C        | -3.389360900 | -0.462404100 | -1.244895900 |
| H        | -4.463617600 | -0.447892600 | -1.045958300 |
| H        | -3.237658200 | -0.557564700 | -2.323212500 |
| O        | -2.847522500 | -1.629271100 | -0.638323600 |
| H        | -2.825782000 | -1.457112100 | 0.318245800  |
| O        | -3.790938000 | 0.283444800  | 1.436555900  |
| H        | -3.597278700 | 0.321868500  | 2.388266700  |
| O        | 3.783242600  | 5.595250200  | -1.833103700 |
| H        | 4.113609100  | 4.713816400  | -1.938746000 |
| H        | 4.103566800  | 5.878801100  | -0.988019300 |

|                                                                                          |              |              |              |
|------------------------------------------------------------------------------------------|--------------|--------------|--------------|
| O                                                                                        | 4.974116100  | 2.274911000  | 3.652135400  |
| H                                                                                        | 4.966652700  | 1.911963900  | 2.775963700  |
| H                                                                                        | 4.158744600  | 2.749702800  | 3.731904600  |
| <b><math>{}^3\eta\pi^*/{}^3\pi\pi^*</math> to <math>T_1({}^3\pi\pi^*)</math> minimum</b> |              |              |              |
| coord_1                                                                                  |              |              |              |
| C                                                                                        | 3.221740900  | -0.808990200 | 0.204430100  |
| C                                                                                        | 3.113421900  | 0.587094200  | -0.038355000 |
| C                                                                                        | 1.906813500  | 1.211761300  | -0.226081100 |
| C                                                                                        | 0.830162200  | -0.938956300 | -0.027452000 |
| C                                                                                        | 2.007273600  | -1.576937400 | 0.139797000  |
| C                                                                                        | 4.569816300  | -1.241635300 | 0.349764100  |
| C                                                                                        | 5.480717500  | -0.233284100 | 0.232963100  |
| N                                                                                        | 0.705520200  | 0.468764100  | -0.013726000 |
| H                                                                                        | -0.091794000 | -1.475311400 | -0.126363000 |
| H                                                                                        | 2.028600600  | -2.649344700 | 0.181429100  |
| H                                                                                        | 4.847699400  | -2.262269600 | 0.531686100  |
| H                                                                                        | 6.545794800  | -0.296667100 | 0.311845100  |
| S                                                                                        | 1.766319500  | 2.947419800  | -0.604695200 |
| S                                                                                        | 4.722333300  | 1.327494400  | -0.068464000 |
| C                                                                                        | -0.608287200 | 1.089436300  | 0.159376000  |
| O                                                                                        | -1.398754400 | 0.918012300  | -1.021238300 |
| C                                                                                        | -1.423850400 | 0.530180100  | 1.302531400  |
| H                                                                                        | -0.511207100 | 2.162202600  | 0.322662100  |
| C                                                                                        | -2.775156800 | 0.845536200  | -0.623356200 |
| C                                                                                        | -2.795919800 | 0.964284300  | 0.891388200  |
| H                                                                                        | -1.121529300 | 0.926898300  | 2.275858600  |
| H                                                                                        | -1.383630400 | -0.560095200 | 1.364226400  |
| H                                                                                        | -3.291707900 | 1.705832500  | -1.055573300 |
| H                                                                                        | -2.930720800 | 2.013612600  | 1.167662300  |
| C                                                                                        | -3.405353000 | -0.421058100 | -1.198545300 |
| H                                                                                        | -4.478988300 | -0.441126100 | -0.996703300 |
| H                                                                                        | -3.254967900 | -0.463751100 | -2.280472600 |
| O                                                                                        | -2.832308800 | -1.600333400 | -0.646499200 |
| H                                                                                        | -2.812528800 | -1.471213400 | 0.316828100  |
| O                                                                                        | -3.820591100 | 0.200772100  | 1.514288400  |
| H                                                                                        | -3.622925000 | 0.198681100  | 2.466089700  |
| O                                                                                        | 4.047073100  | 4.798969300  | -1.092271300 |
| H                                                                                        | 4.295292200  | 4.425816200  | -1.928017500 |
| H                                                                                        | 4.834617400  | 4.784014300  | -0.562816200 |
| O                                                                                        | 4.914975400  | 2.011749600  | 3.697273000  |
| H                                                                                        | 4.934319400  | 1.745086500  | 2.787228800  |
| H                                                                                        | 4.064828100  | 2.413207700  | 3.816627100  |

coord\_2

|   |              |              |              |
|---|--------------|--------------|--------------|
| C | 3.215991000  | -0.836141000 | 0.204406000  |
| C | 3.115604000  | 0.565014000  | -0.030827000 |
| C | 1.913463000  | 1.197099000  | -0.220271000 |
| C | 0.825034000  | -0.948553000 | -0.037788000 |
| C | 1.999046000  | -1.594275000 | 0.131076000  |
| C | 4.560400000  | -1.275066000 | 0.354895000  |
| C | 5.476178000  | -0.269913000 | 0.249630000  |
| N | 0.709436000  | 0.458225000  | -0.021526000 |
| H | -0.098159000 | -1.482453000 | -0.139875000 |
| H | 2.013906000  | -2.666967000 | 0.170084000  |
| H | 4.831771000  | -2.298445000 | 0.532526000  |
| H | 6.540320000  | -0.341001000 | 0.333988000  |
| S | 1.790206000  | 2.929608000  | -0.595408000 |
| S | 4.727823000  | 1.296927000  | -0.048148000 |
| C | -0.606628000 | 1.079650000  | 0.134167000  |
| O | -1.396570000 | 0.876601000  | -1.042297000 |
| C | -1.419917000 | 0.539227000  | 1.287451000  |
| H | -0.515317000 | 2.156679000  | 0.273167000  |
| C | -2.773276000 | 0.810061000  | -0.643408000 |
| C | -2.794466000 | 0.957144000  | 0.868799000  |
| H | -1.119006000 | 0.956115000  | 2.252523000  |
| H | -1.374327000 | -0.549705000 | 1.369552000  |
| H | -3.290219000 | 1.662443000  | -1.090581000 |
| H | -2.935084000 | 2.010713000  | 1.125002000  |
| C | -3.404344000 | -0.466822000 | -1.195150000 |
| H | -4.477588000 | -0.484125000 | -0.990658000 |
| H | -3.255447000 | -0.529049000 | -2.276357000 |
| O | -2.830210000 | -1.635516000 | -0.622657000 |
| H | -2.808215000 | -1.487964000 | 0.337938000  |
| O | -3.813914000 | 0.199511000  | 1.507467000  |
| H | -3.619731000 | 0.223799000  | 2.459632000  |
| O | 4.017759000  | 4.887445000  | -1.174586000 |
| H | 4.286919000  | 4.438094000  | -1.963850000 |
| H | 4.769098000  | 4.906046000  | -0.598006000 |
| O | 4.921547000  | 2.040990000  | 3.692258000  |
| H | 4.937912000  | 1.763628000  | 2.785977000  |
| H | 4.075263000  | 2.450596000  | 3.807214000  |

coord\_3

|   |             |              |              |
|---|-------------|--------------|--------------|
| C | 3.210240000 | -0.863293000 | 0.204382000  |
| C | 3.117785000 | 0.542933000  | -0.023299000 |
| C | 1.920111000 | 1.182437000  | -0.214461000 |

|   |              |              |              |
|---|--------------|--------------|--------------|
| C | 0.819906000  | -0.958150000 | -0.048123000 |
| C | 1.990818000  | -1.611612000 | 0.122356000  |
| C | 4.550984000  | -1.308497000 | 0.360026000  |
| C | 5.471638000  | -0.306542000 | 0.266296000  |
| N | 0.713353000  | 0.447686000  | -0.029327000 |
| H | -0.105685000 | -1.486934000 | -0.153948000 |
| H | 1.998014000  | -2.684474000 | 0.158525000  |
| H | 4.817373000  | -2.333901000 | 0.532995000  |
| H | 6.534905000  | -0.383252000 | 0.355985000  |
| S | 1.814093000  | 2.911797000  | -0.586121000 |
| S | 4.733312000  | 1.266360000  | -0.027832000 |
| C | -0.599233000 | 1.076390000  | 0.130422000  |
| O | -1.390405000 | 0.885000000  | -1.046980000 |
| C | -1.416371000 | 0.536458000  | 1.281864000  |
| H | -0.501450000 | 2.152283000  | 0.274229000  |
| C | -2.767532000 | 0.825773000  | -0.648555000 |
| C | -2.787878000 | 0.966260000  | 0.864260000  |
| H | -1.113536000 | 0.946927000  | 2.249154000  |
| H | -1.378433000 | -0.553073000 | 1.359744000  |
| H | -3.279738000 | 1.682608000  | -1.092820000 |
| H | -2.921228000 | 2.019416000  | 1.125838000  |
| C | -3.406195000 | -0.445183000 | -1.204784000 |
| H | -4.479535000 | -0.456572000 | -1.000433000 |
| H | -3.258352000 | -0.504695000 | -2.286199000 |
| O | -2.838472000 | -1.619005000 | -0.636062000 |
| H | -2.817559000 | -1.475422000 | 0.325126000  |
| O | -3.813486000 | 0.212541000  | 1.497740000  |
| H | -3.615316000 | 0.222136000  | 2.449245000  |
| O | 3.988444000  | 4.975921000  | -1.256901000 |
| H | 4.277817000  | 4.448044000  | -1.988277000 |
| H | 4.699503000  | 5.029355000  | -0.633329000 |
| O | 4.928118000  | 2.070230000  | 3.687242000  |
| H | 4.941505000  | 1.782170000  | 2.784725000  |
| H | 4.085512000  | 2.488077000  | 3.797824000  |

coord\_4

|   |             |              |              |
|---|-------------|--------------|--------------|
| C | 3.204490000 | -0.890444000 | 0.204359000  |
| C | 3.119967000 | 0.520853000  | -0.015771000 |
| C | 1.926760000 | 1.167774000  | -0.208652000 |
| C | 0.814778000 | -0.967747000 | -0.058458000 |
| C | 1.982590000 | -1.628950000 | 0.113635000  |
| C | 4.541568000 | -1.341928000 | 0.365156000  |
| C | 5.467098000 | -0.343172000 | 0.282963000  |

|         |              |              |              |
|---------|--------------|--------------|--------------|
| N       | 0.717269000  | 0.437147000  | -0.037127000 |
| H       | -0.113186000 | -1.491377000 | -0.168010000 |
| H       | 1.982129000  | -2.701940000 | 0.146942000  |
| H       | 4.803121000  | -2.369290000 | 0.533383000  |
| H       | 6.529445000  | -0.425514000 | 0.377975000  |
| S       | 1.837979000  | 2.893985000  | -0.576833000 |
| S       | 4.738801000  | 1.235793000  | -0.007517000 |
| C       | -0.592830000 | 1.072158000  | 0.119835000  |
| O       | -1.384974000 | 0.880048000  | -1.057123000 |
| C       | -1.412069000 | 0.538709000  | 1.272764000  |
| H       | -0.490853000 | 2.148281000  | 0.259487000  |
| C       | -2.762216000 | 0.825061000  | -0.658438000 |
| C       | -2.782319000 | 0.970075000  | 0.853906000  |
| H       | -1.108933000 | 0.952300000  | 2.238590000  |
| H       | -1.377079000 | -0.550702000 | 1.355106000  |
| H       | -3.272006000 | 1.682022000  | -1.105197000 |
| H       | -2.912847000 | 2.024328000  | 1.112261000  |
| C       | -3.404313000 | -0.446208000 | -1.210383000 |
| H       | -4.477751000 | -0.453965000 | -1.006440000 |
| H       | -3.256409000 | -0.509627000 | -2.291603000 |
| O       | -2.840578000 | -1.619922000 | -0.637495000 |
| H       | -2.818688000 | -1.473236000 | 0.323364000  |
| O       | -3.809273000 | 0.221097000  | 1.490739000  |
| H       | -3.610745000 | 0.234878000  | 2.442123000  |
| O       | 3.959130000  | 5.064396000  | -1.339215000 |
| H       | 4.266530000  | 4.459213000  | -1.999942000 |
| H       | 4.624470000  | 5.153431000  | -0.670862000 |
| O       | 4.934689000  | 2.099470000  | 3.682227000  |
| H       | 4.945097000  | 1.800712000  | 2.783474000  |
| H       | 4.095679000  | 2.525603000  | 3.788444000  |
| coord_5 |              |              |              |
| C       | 3.198740000  | -0.917595000 | 0.204335000  |
| C       | 3.122149000  | 0.498772000  | -0.008243000 |
| C       | 1.933409000  | 1.153112000  | -0.202842000 |
| C       | 0.809650000  | -0.977344000 | -0.068794000 |
| C       | 1.974362000  | -1.646287000 | 0.104914000  |
| C       | 4.532152000  | -1.375359000 | 0.370287000  |
| C       | 5.462559000  | -0.379801000 | 0.299629000  |
| N       | 0.721185000  | 0.426608000  | -0.044928000 |
| H       | -0.120661000 | -1.495788000 | -0.182070000 |
| H       | 1.966270000  | -2.719350000 | 0.135345000  |
| H       | 4.788750000  | -2.404657000 | 0.533865000  |

|   |              |              |              |
|---|--------------|--------------|--------------|
| H | 6.523941000  | -0.467805000 | 0.399966000  |
| S | 1.861866000  | 2.876174000  | -0.567546000 |
| S | 4.744290000  | 1.205226000  | 0.012799000  |
| C | -0.586870000 | 1.067099000  | 0.108195000  |
| O | -1.381160000 | 0.870626000  | -1.066939000 |
| C | -1.405714000 | 0.541190000  | 1.264446000  |
| H | -0.482118000 | 2.143740000  | 0.241701000  |
| C | -2.758059000 | 0.819814000  | -0.666140000 |
| C | -2.775869000 | 0.973353000  | 0.845315000  |
| H | -1.099191000 | 0.958899000  | 2.227326000  |
| H | -1.371838000 | -0.547805000 | 1.352116000  |
| H | -3.267588000 | 1.675305000  | -1.115919000 |
| H | -2.903785000 | 2.029425000  | 1.098109000  |
| C | -3.403550000 | -0.452449000 | -1.212382000 |
| H | -4.476925000 | -0.457407000 | -1.007807000 |
| H | -3.256402000 | -0.520578000 | -2.293375000 |
| O | -2.841780000 | -1.625329000 | -0.636147000 |
| H | -2.818843000 | -1.475464000 | 0.324079000  |
| O | -3.803981000 | 0.230068000  | 1.486771000  |
| H | -3.607696000 | 0.252720000  | 2.438559000  |
| O | 3.929815000  | 5.152872000  | -1.421530000 |
| H | 4.251879000  | 4.475265000  | -1.999824000 |
| H | 4.544469000  | 5.277643000  | -0.711647000 |
| O | 4.941260000  | 2.128710000  | 3.677212000  |
| H | 4.948690000  | 1.819254000  | 2.782222000  |
| H | 4.105943000  | 2.563087000  | 3.779049000  |

coord\_6

|   |              |              |              |
|---|--------------|--------------|--------------|
| C | 3.192989000  | -0.944747000 | 0.204311000  |
| C | 3.124331000  | 0.476691000  | -0.000715000 |
| C | 1.940058000  | 1.138450000  | -0.197032000 |
| C | 0.804521000  | -0.986940000 | -0.079130000 |
| C | 1.966134000  | -1.663625000 | 0.096194000  |
| C | 4.522736000  | -1.408790000 | 0.375418000  |
| C | 5.458019000  | -0.416430000 | 0.316296000  |
| N | 0.725101000  | 0.416069000  | -0.052728000 |
| H | -0.128166000 | -1.500044000 | -0.196173000 |
| H | 1.950432000  | -2.736717000 | 0.123740000  |
| H | 4.774380000  | -2.439986000 | 0.534327000  |
| H | 6.518390000  | -0.510105000 | 0.421952000  |
| S | 1.885752000  | 2.858362000  | -0.558259000 |
| S | 4.749779000  | 1.174658000  | 0.033115000  |
| C | -0.580158000 | 1.062713000  | 0.097865000  |

|         |              |              |              |
|---------|--------------|--------------|--------------|
| O       | -1.375388000 | 0.864923000  | -1.076334000 |
| C       | -1.400169000 | 0.543752000  | 1.256183000  |
| H       | -0.471477000 | 2.139507000  | 0.227443000  |
| C       | -2.752308000 | 0.819434000  | -0.675183000 |
| C       | -2.768995000 | 0.978023000  | 0.835765000  |
| H       | -1.092152000 | 0.964083000  | 2.217530000  |
| H       | -1.369283000 | -0.545122000 | 1.347027000  |
| H       | -3.259132000 | 1.675167000  | -1.127549000 |
| H       | -2.893887000 | 2.035302000  | 1.084766000  |
| C       | -3.401813000 | -0.452513000 | -1.217273000 |
| H       | -4.475275000 | -0.452791000 | -1.013084000 |
| H       | -3.254658000 | -0.525069000 | -2.298005000 |
| O       | -2.844522000 | -1.625592000 | -0.636986000 |
| H       | -2.820674000 | -1.472806000 | 0.322752000  |
| O       | -3.798755000 | 0.239545000  | 1.480391000  |
| H       | -3.602285000 | 0.265717000  | 2.431951000  |
| O       | 3.900501000  | 5.241348000  | -1.503845000 |
| H       | 4.232945000  | 4.499736000  | -1.990460000 |
| H       | 4.460269000  | 5.401314000  | -0.756602000 |
| O       | 4.947831000  | 2.157950000  | 3.672197000  |
| H       | 4.952282000  | 1.837796000  | 2.780970000  |
| H       | 4.116301000  | 2.600523000  | 3.769641000  |
| coord_7 |              |              |              |
| C       | 3.187239000  | -0.971898000 | 0.204288000  |
| C       | 3.126512000  | 0.454611000  | 0.006813000  |
| C       | 1.946707000  | 1.123787000  | -0.191222000 |
| C       | 0.799393000  | -0.996537000 | -0.089465000 |
| C       | 1.957906000  | -1.680962000 | 0.087473000  |
| C       | 4.513320000  | -1.442221000 | 0.380549000  |
| C       | 5.453479000  | -0.453059000 | 0.332963000  |
| N       | 0.729017000  | 0.405530000  | -0.060528000 |
| H       | -0.135553000 | -1.504453000 | -0.210230000 |
| H       | 1.934596000  | -2.754030000 | 0.112122000  |
| H       | 4.760022000  | -2.475267000 | 0.534802000  |
| H       | 6.512793000  | -0.552422000 | 0.443926000  |
| S       | 1.909639000  | 2.840551000  | -0.548971000 |
| S       | 4.755268000  | 1.144091000  | 0.053431000  |
| C       | -0.574379000 | 1.058040000  | 0.090308000  |
| O       | -1.371681000 | 0.860595000  | -1.082733000 |
| C       | -1.397355000 | 0.546925000  | 1.250908000  |
| H       | -0.460576000 | 2.134789000  | 0.216342000  |
| C       | -2.748816000 | 0.819806000  | -0.681160000 |

|         |              |              |              |
|---------|--------------|--------------|--------------|
| C       | -2.765679000 | 0.983419000  | 0.829154000  |
| H       | -1.088769000 | 0.970456000  | 2.210667000  |
| H       | -1.370054000 | -0.541684000 | 1.346523000  |
| H       | -3.252770000 | 1.675404000  | -1.136867000 |
| H       | -2.889054000 | 2.041873000  | 1.073920000  |
| C       | -3.402355000 | -0.452216000 | -1.218449000 |
| H       | -4.475375000 | -0.449553000 | -1.012197000 |
| H       | -3.256809000 | -0.528749000 | -2.299151000 |
| O       | -2.848078000 | -1.624622000 | -0.634319000 |
| H       | -2.822962000 | -1.467267000 | 0.324644000  |
| O       | -3.798300000 | 0.250159000  | 1.475889000  |
| H       | -3.601194000 | 0.275373000  | 2.427399000  |
| O       | 3.871186000  | 5.329823000  | -1.586160000 |
| H       | 4.209292000  | 4.535279000  | -1.975628000 |
| H       | 4.372892000  | 5.523785000  | -0.806434000 |
| O       | 4.954402000  | 2.187190000  | 3.667181000  |
| H       | 4.955875000  | 1.856338000  | 2.779719000  |
| H       | 4.126753000  | 2.637911000  | 3.760222000  |
| coord_8 |              |              |              |
| C       | 3.181489000  | -0.999049000 | 0.204264000  |
| C       | 3.128694000  | 0.432530000  | 0.014341000  |
| C       | 1.953356000  | 1.109125000  | -0.185413000 |
| C       | 0.794265000  | -1.006134000 | -0.099801000 |
| C       | 1.949679000  | -1.698300000 | 0.078752000  |
| C       | 4.503905000  | -1.475653000 | 0.385679000  |
| C       | 5.448939000  | -0.489689000 | 0.349629000  |
| N       | 0.732934000  | 0.394991000  | -0.068329000 |
| H       | -0.142910000 | -1.508857000 | -0.224264000 |
| H       | 1.918808000  | -2.771303000 | 0.100490000  |
| H       | 4.745864000  | -2.510462000 | 0.535286000  |
| H       | 6.507151000  | -0.594753000 | 0.465898000  |
| S       | 1.933525000  | 2.822739000  | -0.539684000 |
| S       | 4.760757000  | 1.113524000  | 0.073746000  |
| C       | -0.567082000 | 1.053668000  | 0.077737000  |
| O       | -1.364836000 | 0.853762000  | -1.094642000 |
| C       | -1.390464000 | 0.548698000  | 1.240111000  |
| H       | -0.449526000 | 2.130732000  | 0.198688000  |
| C       | -2.741852000 | 0.818645000  | -0.692726000 |
| C       | -2.757054000 | 0.987936000  | 0.817025000  |
| H       | -1.079613000 | 0.974074000  | 2.198252000  |
| H       | -1.365915000 | -0.539696000 | 1.339330000  |
| H       | -3.243993000 | 1.673938000  | -1.150929000 |



|         |              |              |              |
|---------|--------------|--------------|--------------|
| H       | -2.875564000 | 2.047684000  | 1.058570000  |
| C       | -3.399338000 | -0.452968000 | -1.225846000 |
| H       | -4.472806000 | -0.445394000 | -1.021752000 |
| H       | -3.252564000 | -0.533690000 | -2.306083000 |
| O       | -2.849516000 | -1.625678000 | -0.637698000 |
| H       | -2.824457000 | -1.466504000 | 0.320976000  |
| O       | -3.791382000 | 0.260110000  | 1.466419000  |
| H       | -3.594413000 | 0.290501000  | 2.417826000  |
| O       | 3.841872000  | 5.418299000  | -1.668474000 |
| H       | 4.181064000  | 4.583138000  | -1.959605000 |
| H       | 4.283516000  | 5.644474000  | -0.861568000 |
| O       | 4.960974000  | 2.216431000  | 3.662166000  |
| H       | 4.959468000  | 1.874880000  | 2.778467000  |
| H       | 4.137298000  | 2.675247000  | 3.750794000  |
| coord_9 |              |              |              |
| C       | 3.175738000  | -1.026200000 | 0.204240000  |
| C       | 3.130876000  | 0.410450000  | 0.021869000  |
| C       | 1.960005000  | 1.094462000  | -0.179603000 |
| C       | 0.789137000  | -1.015731000 | -0.110136000 |
| C       | 1.941451000  | -1.715637000 | 0.070031000  |
| C       | 4.494489000  | -1.509084000 | 0.390810000  |
| C       | 5.444400000  | -0.526318000 | 0.366296000  |
| N       | 0.736850000  | 0.384452000  | -0.076129000 |
| H       | -0.150238000 | -1.513249000 | -0.238285000 |
| H       | 1.903038000  | -2.788531000 | 0.088849000  |
| H       | 4.731491000  | -2.545672000 | 0.535751000  |
| H       | 6.501461000  | -0.637099000 | 0.487861000  |
| S       | 1.957412000  | 2.804928000  | -0.530397000 |
| S       | 4.766247000  | 1.082957000  | 0.094062000  |
| C       | -0.561284000 | 1.049814000  | 0.063473000  |
| O       | -1.356672000 | 0.848533000  | -1.110511000 |
| C       | -1.391115000 | 0.556151000  | 1.226596000  |
| H       | -0.438837000 | 2.126808000  | 0.179134000  |
| C       | -2.735109000 | 0.817136000  | -0.713136000 |
| C       | -2.755570000 | 0.995639000  | 0.795325000  |
| H       | -1.083105000 | 0.988392000  | 2.182671000  |
| H       | -1.369344000 | -0.531432000 | 1.334785000  |
| H       | -3.235258000 | 1.669419000  | -1.179219000 |
| H       | -2.873568000 | 2.057109000  | 1.029375000  |
| C       | -3.391256000 | -0.457863000 | -1.239877000 |
| H       | -4.465531000 | -0.447280000 | -1.040485000 |
| H       | -3.239757000 | -0.547156000 | -2.318790000 |

|          |              |              |              |
|----------|--------------|--------------|--------------|
| O        | -2.845793000 | -1.626255000 | -0.639392000 |
| H        | -2.824339000 | -1.458766000 | 0.317978000  |
| O        | -3.794229000 | 0.274220000  | 1.445431000  |
| H        | -3.599940000 | 0.308221000  | 2.397197000  |
| O        | 3.812557000  | 5.506775000  | -1.750789000 |
| H        | 4.148877000  | 4.643087000  | -1.946322000 |
| H        | 4.193363000  | 5.762922000  | -0.922129000 |
| O        | 4.967545000  | 2.245671000  | 3.657151000  |
| H        | 4.963060000  | 1.893422000  | 2.777215000  |
| H        | 4.147934000  | 2.712528000  | 3.741357000  |
| coord_10 |              |              |              |
| C        | 3.169987900  | -1.053351700 | 0.204216300  |
| C        | 3.133057700  | 0.388369400  | 0.029396700  |
| C        | 1.966653900  | 1.079800200  | -0.173793000 |
| C        | 0.784008500  | -1.025327900 | -0.120471500 |
| C        | 1.933222800  | -1.732974700 | 0.061310600  |
| C        | 4.485072700  | -1.542514500 | 0.395940900  |
| C        | 5.439860000  | -0.562947000 | 0.382962400  |
| N        | 0.740766100  | 0.373912700  | -0.083929600 |
| H        | -0.157611600 | -1.517576100 | -0.251990500 |
| H        | 1.887493000  | -2.805708700 | 0.078010000  |
| H        | 4.717501200  | -2.580791400 | 0.535978500  |
| H        | 6.495717900  | -0.679486300 | 0.509911700  |
| S        | 1.981298500  | 2.787116200  | -0.521109600 |
| S        | 4.771735800  | 1.052389300  | 0.114377900  |
| C        | -0.555248300 | 1.044586700  | 0.051685800  |
| O        | -1.351393200 | 0.840024200  | -1.121511500 |
| C        | -1.387072000 | 0.559629100  | 1.217102300  |
| H        | -0.428934700 | 2.121610900  | 0.161320800  |
| C        | -2.729977000 | 0.813642400  | -0.724258100 |
| C        | -2.750591100 | 0.999732900  | 0.783270300  |
| H        | -1.078565800 | 0.996283400  | 2.171071200  |
| H        | -1.367640700 | -0.527440000 | 1.331223800  |
| H        | -3.228068600 | 1.664788500  | -1.194832700 |
| H        | -2.866812000 | 2.062544800  | 1.011947800  |
| C        | -3.389360900 | -0.462404100 | -1.244895900 |
| H        | -4.463617600 | -0.447892600 | -1.045958300 |
| H        | -3.237658200 | -0.557564700 | -2.323212500 |
| O        | -2.847522500 | -1.629271100 | -0.638323600 |
| H        | -2.825782000 | -1.457112100 | 0.318245800  |
| O        | -3.790938000 | 0.283444800  | 1.436555900  |
| H        | -3.597278700 | 0.321868500  | 2.388266700  |

|   |             |             |              |
|---|-------------|-------------|--------------|
| O | 3.783242600 | 5.595250200 | -1.833103700 |
| H | 4.113609100 | 4.713816400 | -1.938746000 |
| H | 4.103566800 | 5.878801100 | -0.988019300 |
| O | 4.974116100 | 2.274911000 | 3.652135400  |
| H | 4.966652700 | 1.911963900 | 2.775963700  |
| H | 4.158744600 | 2.749702800 | 3.731904600  |

**S<sub>2</sub>(<sup>1</sup>ππ\*) minimum to T<sub>3</sub>(<sup>3</sup>ππ\*) minimum**

coord\_1

|   |              |              |              |
|---|--------------|--------------|--------------|
| C | 3.141221000  | -1.102899000 | 0.079226000  |
| C | 3.117087000  | 0.365888000  | -0.017711000 |
| C | 1.972624000  | 1.063409000  | -0.190414000 |
| C | 0.761152000  | -1.000704000 | -0.230371000 |
| C | 1.928584000  | -1.747254000 | -0.042164000 |
| C | 4.464016000  | -1.594669000 | 0.273491000  |
| C | 5.402277000  | -0.607660000 | 0.324689000  |
| N | 0.764092000  | 0.371463000  | -0.270608000 |
| H | -0.186630000 | -1.483157000 | -0.345625000 |
| H | 1.846139000  | -2.817142000 | -0.007927000 |
| H | 4.705340000  | -2.635066000 | 0.373157000  |
| H | 6.455612000  | -0.739690000 | 0.463629000  |
| S | 1.921829000  | 2.841912000  | -0.340868000 |
| S | 4.760960000  | 1.031858000  | 0.131335000  |
| C | -0.551513000 | 1.034594000  | -0.199561000 |
| O | -1.360926000 | 0.692345000  | -1.330905000 |
| C | -1.362116000 | 0.663215000  | 1.022064000  |
| H | -0.473911000 | 2.119295000  | -0.214456000 |
| C | -2.734369000 | 0.731112000  | -0.918676000 |
| C | -2.736609000 | 1.046493000  | 0.568478000  |
| H | -1.043691000 | 1.195412000  | 1.922735000  |
| H | -1.331855000 | -0.407022000 | 1.242887000  |
| H | -3.217855000 | 1.551266000  | -1.454074000 |
| H | -2.865151000 | 2.123513000  | 0.706674000  |
| C | -3.422414000 | -0.569525000 | -1.325484000 |
| H | -4.492744000 | -0.521771000 | -1.111586000 |
| H | -3.289662000 | -0.752532000 | -2.395162000 |
| O | -2.885376000 | -1.691974000 | -0.636374000 |
| H | -2.840290000 | -1.442459000 | 0.302166000  |
| O | -3.757788000 | 0.377100000  | 1.297797000  |
| H | -3.547760000 | 0.496965000  | 2.239246000  |
| O | 3.847065000  | 5.683179000  | -1.940925000 |
| H | 3.408607000  | 4.850621000  | -1.830882000 |
| H | 4.710638000  | 5.555861000  | -1.572410000 |

|         |              |              |              |
|---------|--------------|--------------|--------------|
| O       | 4.817912000  | 2.198328000  | 3.645998000  |
| H       | 4.890663000  | 1.982088000  | 2.724811000  |
| H       | 4.036436000  | 2.729113000  | 3.714868000  |
| coord_2 |              |              |              |
| C       | 3.144360000  | -1.096267000 | 0.077396000  |
| C       | 3.121884000  | 0.363301000  | -0.017764000 |
| C       | 1.967657000  | 1.070006000  | -0.192828000 |
| C       | 0.759682000  | -0.997511000 | -0.231066000 |
| C       | 1.931481000  | -1.747616000 | -0.043004000 |
| C       | 4.468565000  | -1.591309000 | 0.272160000  |
| C       | 5.406358000  | -0.605449000 | 0.324516000  |
| N       | 0.764970000  | 0.373005000  | -0.270744000 |
| H       | -0.188294000 | -1.479365000 | -0.345969000 |
| H       | 1.851332000  | -2.817290000 | -0.008774000 |
| H       | 4.707570000  | -2.632262000 | 0.371303000  |
| H       | 6.459813000  | -0.735886000 | 0.463885000  |
| S       | 1.928681000  | 2.839250000  | -0.340830000 |
| S       | 4.761363000  | 1.029951000  | 0.131840000  |
| C       | -0.550874000 | 1.036069000  | -0.199990000 |
| O       | -1.360506000 | 0.694180000  | -1.331463000 |
| C       | -1.361640000 | 0.664919000  | 1.021727000  |
| H       | -0.472411000 | 2.120920000  | -0.214997000 |
| C       | -2.733971000 | 0.731801000  | -0.919036000 |
| C       | -2.736369000 | 1.047243000  | 0.568070000  |
| H       | -1.043528000 | 1.197615000  | 1.922207000  |
| H       | -1.331017000 | -0.405160000 | 1.243234000  |
| H       | -3.218161000 | 1.551581000  | -1.454364000 |
| H       | -2.865598000 | 2.124159000  | 0.706244000  |
| C       | -3.421381000 | -0.569250000 | -1.325835000 |
| H       | -4.491745000 | -0.522080000 | -1.111937000 |
| H       | -3.288597000 | -0.752182000 | -2.395516000 |
| O       | -2.883903000 | -1.691493000 | -0.636751000 |
| H       | -2.840479000 | -1.442643000 | 0.302022000  |
| O       | -3.757160000 | 0.377223000  | 1.297387000  |
| H       | -3.547113000 | 0.496969000  | 2.238848000  |
| O       | 3.847237000  | 5.683183000  | -1.941300000 |
| H       | 3.406852000  | 4.851969000  | -1.829258000 |
| H       | 4.710795000  | 5.554711000  | -1.573199000 |
| O       | 4.815145000  | 2.199753000  | 3.647212000  |
| H       | 4.886976000  | 1.988850000  | 2.724947000  |
| H       | 4.033899000  | 2.730242000  | 3.720060000  |
| coord_3 |              |              |              |

|         |              |              |              |
|---------|--------------|--------------|--------------|
| C       | 3.147499000  | -1.089635000 | 0.075566000  |
| C       | 3.126680000  | 0.360715000  | -0.017817000 |
| C       | 1.962689000  | 1.076602000  | -0.195242000 |
| C       | 0.758212000  | -0.994318000 | -0.231760000 |
| C       | 1.934377000  | -1.747978000 | -0.043844000 |
| C       | 4.473113000  | -1.587949000 | 0.270829000  |
| C       | 5.410437000  | -0.603237000 | 0.324342000  |
| N       | 0.765849000  | 0.374547000  | -0.270879000 |
| H       | -0.189958000 | -1.475572000 | -0.346313000 |
| H       | 1.856525000  | -2.817438000 | -0.009622000 |
| H       | 4.709798000  | -2.629457000 | 0.369449000  |
| H       | 6.464013000  | -0.732082000 | 0.464141000  |
| S       | 1.935532000  | 2.836587000  | -0.340792000 |
| S       | 4.761765000  | 1.028043000  | 0.132345000  |
| C       | -0.550235000 | 1.037543000  | -0.200419000 |
| O       | -1.360086000 | 0.696016000  | -1.332021000 |
| C       | -1.361164000 | 0.666623000  | 1.021391000  |
| H       | -0.470911000 | 2.122543000  | -0.215538000 |
| C       | -2.733571000 | 0.732491000  | -0.919396000 |
| C       | -2.736128000 | 1.047994000  | 0.567662000  |
| H       | -1.043365000 | 1.199818000  | 1.921679000  |
| H       | -1.330178000 | -0.403299000 | 1.243581000  |
| H       | -3.218467000 | 1.551895000  | -1.454653000 |
| H       | -2.866044000 | 2.124803000  | 0.705813000  |
| C       | -3.420347000 | -0.568975000 | -1.326186000 |
| H       | -4.490746000 | -0.522389000 | -1.112288000 |
| H       | -3.287530000 | -0.751832000 | -2.395870000 |
| O       | -2.882430000 | -1.691011000 | -0.637127000 |
| H       | -2.840668000 | -1.442826000 | 0.301878000  |
| O       | -3.756532000 | 0.377346000  | 1.296977000  |
| H       | -3.546465000 | 0.496974000  | 2.238449000  |
| O       | 3.847408000  | 5.683185000  | -1.941675000 |
| H       | 3.405096000  | 4.853315000  | -1.827634000 |
| H       | 4.710950000  | 5.553560000  | -1.573987000 |
| O       | 4.812376000  | 2.201178000  | 3.648425000  |
| H       | 4.883288000  | 1.995612000  | 2.725083000  |
| H       | 4.031361000  | 2.731370000  | 3.725250000  |
| coord_4 |              |              |              |
| C       | 3.150638000  | -1.083004000 | 0.073737000  |
| C       | 3.131477000  | 0.358128000  | -0.017871000 |
| C       | 1.957721000  | 1.083198000  | -0.197656000 |
| C       | 0.756742000  | -0.991125000 | -0.232455000 |

|         |              |              |              |
|---------|--------------|--------------|--------------|
| C       | 1.937273000  | -1.748340000 | -0.044685000 |
| C       | 4.477660000  | -1.584589000 | 0.269498000  |
| C       | 5.414517000  | -0.601025000 | 0.324169000  |
| N       | 0.766727000  | 0.376088000  | -0.271014000 |
| H       | -0.191622000 | -1.471779000 | -0.346657000 |
| H       | 1.861717000  | -2.817585000 | -0.010469000 |
| H       | 4.712027000  | -2.626652000 | 0.367596000  |
| H       | 6.468212000  | -0.728279000 | 0.464397000  |
| S       | 1.942383000  | 2.833924000  | -0.340754000 |
| S       | 4.762167000  | 1.026136000  | 0.132850000  |
| C       | -0.549597000 | 1.039018000  | -0.200848000 |
| O       | -1.359667000 | 0.697851000  | -1.332578000 |
| C       | -1.360688000 | 0.668327000  | 1.021054000  |
| H       | -0.469411000 | 2.124167000  | -0.216079000 |
| C       | -2.733172000 | 0.733180000  | -0.919755000 |
| C       | -2.735886000 | 1.048744000  | 0.567253000  |
| H       | -1.043201000 | 1.202020000  | 1.921150000  |
| H       | -1.329339000 | -0.401437000 | 1.243929000  |
| H       | -3.218773000 | 1.552210000  | -1.454942000 |
| H       | -2.866490000 | 2.125448000  | 0.705382000  |
| C       | -3.419313000 | -0.568700000 | -1.326537000 |
| H       | -4.489746000 | -0.522697000 | -1.112639000 |
| H       | -3.286464000 | -0.751481000 | -2.396224000 |
| O       | -2.880956000 | -1.690529000 | -0.637504000 |
| H       | -2.840857000 | -1.443009000 | 0.301735000  |
| O       | -3.755903000 | 0.377469000  | 1.296566000  |
| H       | -3.545818000 | 0.496978000  | 2.238050000  |
| O       | 3.847578000  | 5.683187000  | -1.942050000 |
| H       | 3.403340000  | 4.854661000  | -1.826009000 |
| H       | 4.711106000  | 5.552409000  | -1.574775000 |
| O       | 4.809607000  | 2.202603000  | 3.649639000  |
| H       | 4.879600000  | 2.002374000  | 2.725218000  |
| H       | 4.028823000  | 2.732498000  | 3.730440000  |
| coord_5 |              |              |              |
| C       | 3.153776000  | -1.076372000 | 0.071907000  |
| C       | 3.136273000  | 0.355542000  | -0.017924000 |
| C       | 1.952753000  | 1.089795000  | -0.200070000 |
| C       | 0.755272000  | -0.987932000 | -0.233150000 |
| C       | 1.940169000  | -1.748702000 | -0.045525000 |
| C       | 4.482208000  | -1.581229000 | 0.268167000  |
| C       | 5.418596000  | -0.598814000 | 0.323995000  |
| N       | 0.767605000  | 0.377630000  | -0.271150000 |

|   |              |              |              |
|---|--------------|--------------|--------------|
| H | -0.193286000 | -1.467986000 | -0.347002000 |
| H | 1.866910000  | -2.817733000 | -0.011317000 |
| H | 4.714255000  | -2.623847000 | 0.365742000  |
| H | 6.472411000  | -0.724475000 | 0.464653000  |
| S | 1.949235000  | 2.831261000  | -0.340715000 |
| S | 4.762568000  | 1.024228000  | 0.133355000  |
| C | -0.548958000 | 1.040492000  | -0.201277000 |
| O | -1.359247000 | 0.699686000  | -1.333136000 |
| C | -1.360212000 | 0.670031000  | 1.020717000  |
| H | -0.467911000 | 2.125792000  | -0.216619000 |
| C | -2.732773000 | 0.733869000  | -0.920115000 |
| C | -2.735645000 | 1.049494000  | 0.566845000  |
| H | -1.043038000 | 1.204223000  | 1.920622000  |
| H | -1.328500000 | -0.399575000 | 1.244276000  |
| H | -3.219078000 | 1.552524000  | -1.455231000 |
| H | -2.866936000 | 2.126093000  | 0.704952000  |
| C | -3.418279000 | -0.568424000 | -1.326888000 |
| H | -4.488746000 | -0.523006000 | -1.112990000 |
| H | -3.285397000 | -0.751131000 | -2.396577000 |
| O | -2.879482000 | -1.690048000 | -0.637881000 |
| H | -2.841046000 | -1.443193000 | 0.301591000  |
| O | -3.755274000 | 0.377592000  | 1.296156000  |
| H | -3.545170000 | 0.496982000  | 2.237652000  |
| O | 3.847749000  | 5.683190000  | -1.942425000 |
| H | 3.401584000  | 4.856007000  | -1.824385000 |
| H | 4.711261000  | 5.551258000  | -1.575563000 |
| O | 4.806838000  | 2.204028000  | 3.650852000  |
| H | 4.875913000  | 2.009135000  | 2.725354000  |
| H | 4.026285000  | 2.733625000  | 3.735631000  |

coord\_6

|   |              |              |              |
|---|--------------|--------------|--------------|
| C | 3.156915000  | -1.069740000 | 0.070077000  |
| C | 3.141069000  | 0.352955000  | -0.017977000 |
| C | 1.947785000  | 1.096391000  | -0.202485000 |
| C | 0.753802000  | -0.984739000 | -0.233844000 |
| C | 1.943065000  | -1.749064000 | -0.046365000 |
| C | 4.486756000  | -1.577869000 | 0.266836000  |
| C | 5.422676000  | -0.596602000 | 0.323822000  |
| N | 0.768483000  | 0.379172000  | -0.271285000 |
| H | -0.194951000 | -1.464194000 | -0.347346000 |
| H | 1.872103000  | -2.817881000 | -0.012164000 |
| H | 4.716484000  | -2.621043000 | 0.363888000  |
| H | 6.476611000  | -0.720671000 | 0.464909000  |

|         |              |              |              |
|---------|--------------|--------------|--------------|
| S       | 1.956086000  | 2.828598000  | -0.340677000 |
| S       | 4.762970000  | 1.022321000  | 0.133860000  |
| C       | -0.548319000 | 1.041967000  | -0.201706000 |
| O       | -1.358827000 | 0.701522000  | -1.333694000 |
| C       | -1.359736000 | 0.671735000  | 1.020381000  |
| H       | -0.466410000 | 2.127416000  | -0.217160000 |
| C       | -2.732374000 | 0.734558000  | -0.920475000 |
| C       | -2.735404000 | 1.050244000  | 0.566437000  |
| H       | -1.042874000 | 1.206426000  | 1.920093000  |
| H       | -1.327661000 | -0.397713000 | 1.244623000  |
| H       | -3.219384000 | 1.552838000  | -1.455521000 |
| H       | -2.867382000 | 2.126738000  | 0.704521000  |
| C       | -3.417245000 | -0.568149000 | -1.327239000 |
| H       | -4.487746000 | -0.523315000 | -1.113340000 |
| H       | -3.284331000 | -0.750781000 | -2.396931000 |
| O       | -2.878009000 | -1.689566000 | -0.638257000 |
| H       | -2.841235000 | -1.443376000 | 0.301447000  |
| O       | -3.754646000 | 0.377716000  | 1.295745000  |
| H       | -3.544522000 | 0.496986000  | 2.237253000  |
| O       | 3.847920000  | 5.683192000  | -1.942800000 |
| H       | 3.399828000  | 4.857353000  | -1.822761000 |
| H       | 4.711417000  | 5.550106000  | -1.576351000 |
| O       | 4.804070000  | 2.205453000  | 3.652065000  |
| H       | 4.872225000  | 2.015897000  | 2.725489000  |
| H       | 4.023747000  | 2.734753000  | 3.740822000  |
| coord_7 |              |              |              |
| C       | 3.160053000  | -1.063108000 | 0.068247000  |
| C       | 3.145865000  | 0.350369000  | -0.018030000 |
| C       | 1.942817000  | 1.102988000  | -0.204899000 |
| C       | 0.752331000  | -0.981546000 | -0.234539000 |
| C       | 1.945962000  | -1.749426000 | -0.047205000 |
| C       | 4.491303000  | -1.574509000 | 0.265506000  |
| C       | 5.426755000  | -0.594391000 | 0.323649000  |
| N       | 0.769361000  | 0.380714000  | -0.271420000 |
| H       | -0.196615000 | -1.460401000 | -0.347690000 |
| H       | 1.877295000  | -2.818028000 | -0.013012000 |
| H       | 4.718712000  | -2.618238000 | 0.362034000  |
| H       | 6.480810000  | -0.716867000 | 0.465166000  |
| S       | 1.962937000  | 2.825935000  | -0.340639000 |
| S       | 4.763372000  | 1.020413000  | 0.134365000  |
| C       | -0.547680000 | 1.043441000  | -0.202135000 |
| O       | -1.358407000 | 0.703357000  | -1.334251000 |



|         |              |              |              |
|---------|--------------|--------------|--------------|
| C       | -1.359260000 | 0.673439000  | 1.020044000  |
| H       | -0.464910000 | 2.129039000  | -0.217701000 |
| C       | -2.731975000 | 0.735248000  | -0.920834000 |
| C       | -2.735163000 | 1.050994000  | 0.566028000  |
| H       | -1.042711000 | 1.208628000  | 1.919565000  |
| H       | -1.326822000 | -0.395852000 | 1.244970000  |
| H       | -3.219689000 | 1.553153000  | -1.455810000 |
| H       | -2.867828000 | 2.127383000  | 0.704090000  |
| C       | -3.416211000 | -0.567874000 | -1.327590000 |
| H       | -4.486746000 | -0.523623000 | -1.113691000 |
| H       | -3.283265000 | -0.750430000 | -2.397285000 |
| O       | -2.876535000 | -1.689084000 | -0.638634000 |
| H       | -2.841423000 | -1.443559000 | 0.301303000  |
| O       | -3.754017000 | 0.377839000  | 1.295335000  |
| H       | -3.543874000 | 0.496990000  | 2.236854000  |
| O       | 3.848091000  | 5.683194000  | -1.943174000 |
| H       | 3.398072000  | 4.858700000  | -1.821136000 |
| H       | 4.711573000  | 5.548955000  | -1.577140000 |
| O       | 4.801301000  | 2.206878000  | 3.653278000  |
| H       | 4.868537000  | 2.022658000  | 2.725624000  |
| H       | 4.021209000  | 2.735881000  | 3.746012000  |
| coord_8 |              |              |              |
| C       | 3.163192000  | -1.056476000 | 0.066418000  |
| C       | 3.150662000  | 0.347782000  | -0.018083000 |
| C       | 1.937849000  | 1.109584000  | -0.207313000 |
| C       | 0.750861000  | -0.978353000 | -0.235234000 |
| C       | 1.948858000  | -1.749788000 | -0.048045000 |
| C       | 4.495851000  | -1.571148000 | 0.264175000  |
| C       | 5.430834000  | -0.592179000 | 0.323475000  |
| N       | 0.770239000  | 0.382255000  | -0.271556000 |
| H       | -0.198279000 | -1.456608000 | -0.348034000 |
| H       | 1.882488000  | -2.818176000 | -0.013859000 |
| H       | 4.720941000  | -2.615433000 | 0.360180000  |
| H       | 6.485010000  | -0.713063000 | 0.465422000  |
| S       | 1.969789000  | 2.823272000  | -0.340601000 |
| S       | 4.763773000  | 1.018506000  | 0.134871000  |
| C       | -0.547041000 | 1.044916000  | -0.202564000 |
| O       | -1.357987000 | 0.705192000  | -1.334809000 |
| C       | -1.358784000 | 0.675144000  | 1.019707000  |
| H       | -0.463410000 | 2.130663000  | -0.218242000 |
| C       | -2.731575000 | 0.735937000  | -0.921194000 |
| C       | -2.734922000 | 1.051744000  | 0.565620000  |

|         |              |              |              |
|---------|--------------|--------------|--------------|
| H       | -1.042547000 | 1.210831000  | 1.919036000  |
| H       | -1.325983000 | -0.393990000 | 1.245317000  |
| H       | -3.219995000 | 1.553467000  | -1.456099000 |
| H       | -2.868274000 | 2.128028000  | 0.703660000  |
| C       | -3.415177000 | -0.567599000 | -1.327941000 |
| H       | -4.485747000 | -0.523932000 | -1.114042000 |
| H       | -3.282198000 | -0.750080000 | -2.397639000 |
| O       | -2.875062000 | -1.688603000 | -0.639011000 |
| H       | -2.841612000 | -1.443742000 | 0.301159000  |
| O       | -3.753388000 | 0.377962000  | 1.294925000  |
| H       | -3.543226000 | 0.496994000  | 2.236456000  |
| O       | 3.848262000  | 5.683197000  | -1.943549000 |
| H       | 3.396316000  | 4.860046000  | -1.819512000 |
| H       | 4.711728000  | 5.547804000  | -1.577928000 |
| O       | 4.798532000  | 2.208303000  | 3.654491000  |
| H       | 4.864849000  | 2.029420000  | 2.725760000  |
| H       | 4.018671000  | 2.737009000  | 3.751203000  |
| coord_9 |              |              |              |
| C       | 3.166330000  | -1.049844000 | 0.064588000  |
| C       | 3.155458000  | 0.345195000  | -0.018136000 |
| C       | 1.932881000  | 1.116180000  | -0.209727000 |
| C       | 0.749391000  | -0.975160000 | -0.235928000 |
| C       | 1.951754000  | -1.750150000 | -0.048886000 |
| C       | 4.500399000  | -1.567788000 | 0.262844000  |
| C       | 5.434914000  | -0.589967000 | 0.323302000  |
| N       | 0.771117000  | 0.383797000  | -0.271691000 |
| H       | -0.199943000 | -1.452816000 | -0.348378000 |
| H       | 1.887681000  | -2.818323000 | -0.014707000 |
| H       | 4.723169000  | -2.612628000 | 0.358326000  |
| H       | 6.489209000  | -0.709259000 | 0.465678000  |
| S       | 1.976640000  | 2.820610000  | -0.340563000 |
| S       | 4.764175000  | 1.016598000  | 0.135376000  |
| C       | -0.546403000 | 1.046391000  | -0.202993000 |
| O       | -1.357567000 | 0.707028000  | -1.335366000 |
| C       | -1.358308000 | 0.676848000  | 1.019370000  |
| H       | -0.461910000 | 2.132287000  | -0.218783000 |
| C       | -2.731176000 | 0.736626000  | -0.921554000 |
| C       | -2.734681000 | 1.052495000  | 0.565211000  |
| H       | -1.042384000 | 1.213034000  | 1.918508000  |
| H       | -1.325145000 | -0.392128000 | 1.245664000  |
| H       | -3.220301000 | 1.553782000  | -1.456388000 |
| H       | -2.868720000 | 2.128673000  | 0.703229000  |

|          |              |              |              |
|----------|--------------|--------------|--------------|
| C        | -3.414143000 | -0.567324000 | -1.328292000 |
| H        | -4.484747000 | -0.524241000 | -1.114393000 |
| H        | -3.281132000 | -0.749730000 | -2.397992000 |
| O        | -2.873588000 | -1.688121000 | -0.639387000 |
| H        | -2.841801000 | -1.443926000 | 0.301015000  |
| O        | -3.752760000 | 0.378085000  | 1.294514000  |
| H        | -3.542578000 | 0.496999000  | 2.236057000  |
| O        | 3.848432000  | 5.683199000  | -1.943924000 |
| H        | 3.394560000  | 4.861392000  | -1.817888000 |
| H        | 4.711884000  | 5.546653000  | -1.578716000 |
| O        | 4.795763000  | 2.209728000  | 3.655704000  |
| H        | 4.861161000  | 2.036182000  | 2.725895000  |
| H        | 4.016133000  | 2.738137000  | 3.756393000  |
| coord_10 |              |              |              |
| C        | 3.169551000  | -1.043074000 | 0.062706000  |
| C        | 3.160334000  | 0.342746000  | -0.018246000 |
| C        | 1.927992000  | 1.122911000  | -0.212200000 |
| C        | 0.748004000  | -0.971834000 | -0.236676000 |
| C        | 1.954734000  | -1.750376000 | -0.049776000 |
| C        | 4.505029000  | -1.564287000 | 0.261463000  |
| C        | 5.439074000  | -0.587613000 | 0.323076000  |
| N        | 0.772076000  | 0.385471000  | -0.271884000 |
| H        | -0.201523000 | -1.448892000 | -0.348774000 |
| H        | 1.892959000  | -2.818335000 | -0.015601000 |
| H        | 4.725482000  | -2.609681000 | 0.356426000  |
| H        | 6.493489000  | -0.705310000 | 0.465882000  |
| S        | 1.983567000  | 2.818080000  | -0.340589000 |
| S        | 4.764655000  | 1.014831000  | 0.135823000  |
| C        | -0.545684000 | 1.047995000  | -0.203482000 |
| O        | -1.357066000 | 0.708988000  | -1.335983000 |
| C        | -1.357752000 | 0.678684000  | 1.018974000  |
| H        | -0.460332000 | 2.134041000  | -0.219387000 |
| C        | -2.730696000 | 0.737439000  | -0.921973000 |
| C        | -2.734360000 | 1.053373000  | 0.564742000  |
| H        | -1.042142000 | 1.215372000  | 1.917918000  |
| H        | -1.324224000 | -0.390133000 | 1.245955000  |
| H        | -3.220526000 | 1.554217000  | -1.456740000 |
| H        | -2.869088000 | 2.129446000  | 0.702734000  |
| C        | -3.413025000 | -0.566927000 | -1.328699000 |
| H        | -4.483663000 | -0.524429000 | -1.114800000 |
| H        | -3.279981000 | -0.749261000 | -2.398401000 |
| O        | -2.872029000 | -1.687514000 | -0.639816000 |

|   |              |              |              |
|---|--------------|--------------|--------------|
| H | -2.841905000 | -1.443981000 | 0.300818000  |
| O | -3.752050000 | 0.378337000  | 1.294044000  |
| H | -3.541850000 | 0.497135000  | 2.235598000  |
| O | 3.848674000  | 5.683332000  | -1.944371000 |
| H | 3.392877000  | 4.862869000  | -1.816333000 |
| H | 4.712110000  | 5.545635000  | -1.579576000 |
| O | 4.793069000  | 2.211304000  | 3.656855000  |
| H | 4.857548000  | 2.043092000  | 2.725969000  |
| H | 4.013669000  | 2.739415000  | 3.761519000  |

**S<sub>1</sub>(<sup>1</sup>nπ\*) minimum to T<sub>3</sub>(<sup>3</sup>ππ\*) minimum**

coord\_1

|   |              |              |              |
|---|--------------|--------------|--------------|
| C | 3.168011000  | -1.042290000 | 0.103688000  |
| C | 3.135127000  | 0.388565000  | 0.008919000  |
| C | 1.982509000  | 1.093285000  | -0.186874000 |
| C | 0.785599000  | -1.006763000 | -0.250452000 |
| C | 1.918243000  | -1.722203000 | -0.065151000 |
| C | 4.475254000  | -1.549645000 | 0.295311000  |
| C | 5.440760000  | -0.575928000 | 0.351958000  |
| N | 0.757405000  | 0.394479000  | -0.244975000 |
| H | -0.159306000 | -1.487760000 | -0.400968000 |
| H | 1.866132000  | -2.794468000 | -0.069424000 |
| H | 4.699534000  | -2.594861000 | 0.388321000  |
| H | 6.493233000  | -0.700630000 | 0.494209000  |
| S | 2.016688000  | 2.860942000  | -0.371244000 |
| S | 4.774636000  | 1.045681000  | 0.166021000  |
| C | -0.545491000 | 1.062583000  | -0.145435000 |
| O | -1.356002000 | 0.768778000  | -1.289194000 |
| C | -1.355847000 | 0.643970000  | 1.059857000  |
| H | -0.438018000 | 2.146366000  | -0.116825000 |
| C | -2.729346000 | 0.776633000  | -0.873476000 |
| C | -2.730020000 | 1.046432000  | 0.621926000  |
| H | -1.035300000 | 1.136864000  | 1.981847000  |
| H | -1.325305000 | -0.434989000 | 1.234662000  |
| H | -3.225280000 | 1.605742000  | -1.383562000 |
| H | -2.854293000 | 2.119207000  | 0.792237000  |
| C | -3.403958000 | -0.520232000 | -1.315883000 |
| H | -4.475674000 | -0.487387000 | -1.105270000 |
| H | -3.265737000 | -0.675123000 | -2.389170000 |
| O | -2.860548000 | -1.655933000 | -0.653993000 |
| H | -2.833341000 | -1.435895000 | 0.292534000  |
| O | -3.753941000 | 0.359569000  | 1.330707000  |
| H | -3.556522000 | 0.470104000  | 2.276089000  |

|         |              |              |              |
|---------|--------------|--------------|--------------|
| O       | 3.738933000  | 5.560078000  | -1.919442000 |
| H       | 3.522234000  | 4.773062000  | -2.406993000 |
| H       | 4.630857000  | 5.434901000  | -1.624613000 |
| O       | 4.875585000  | 2.229663000  | 3.692187000  |
| H       | 4.916939000  | 1.827127000  | 2.834402000  |
| H       | 4.044707000  | 2.684185000  | 3.711690000  |
| coord_2 |              |              |              |
| C       | 3.168251000  | -1.042335000 | 0.099186000  |
| C       | 3.137992000  | 0.383517000  | 0.005962000  |
| C       | 1.976513000  | 1.096618000  | -0.189621000 |
| C       | 0.781490000  | -1.002845000 | -0.248868000 |
| C       | 1.922369000  | -1.725293000 | -0.063395000 |
| C       | 4.478633000  | -1.551227000 | 0.291598000  |
| C       | 5.440641000  | -0.577179000 | 0.348803000  |
| N       | 0.759100000  | 0.393516000  | -0.247902000 |
| H       | -0.164000000 | -1.483375000 | -0.395257000 |
| H       | 1.868882000  | -2.797274000 | -0.063543000 |
| H       | 4.702150000  | -2.596578000 | 0.384752000  |
| H       | 6.493332000  | -0.700368000 | 0.491091000  |
| S       | 2.013064000  | 2.856221000  | -0.367760000 |
| S       | 4.773590000  | 1.042301000  | 0.162731000  |
| C       | -0.545378000 | 1.060962000  | -0.151793000 |
| O       | -1.356111000 | 0.762008000  | -1.294330000 |
| C       | -1.356053000 | 0.647860000  | 1.055364000  |
| H       | -0.440508000 | 2.145062000  | -0.128086000 |
| C       | -2.729412000 | 0.772290000  | -0.878853000 |
| C       | -2.730408000 | 1.047310000  | 0.615709000  |
| H       | -1.036080000 | 1.145677000  | 1.974845000  |
| H       | -1.325211000 | -0.430043000 | 1.236050000  |
| H       | -3.224725000 | 1.600023000  | -1.391620000 |
| H       | -2.855806000 | 2.120421000  | 0.782405000  |
| C       | -3.404909000 | -0.525377000 | -1.317286000 |
| H       | -4.476475000 | -0.491517000 | -1.106235000 |
| H       | -3.267318000 | -0.683262000 | -2.390205000 |
| O       | -2.861822000 | -1.659459000 | -0.652387000 |
| H       | -2.834215000 | -1.436733000 | 0.293533000  |
| O       | -3.753640000 | 0.361674000  | 1.326715000  |
| H       | -3.554802000 | 0.473058000  | 2.271660000  |
| O       | 3.751174000  | 5.573831000  | -1.922116000 |
| H       | 3.502597000  | 4.765824000  | -2.350429000 |
| H       | 4.640248000  | 5.447218000  | -1.619407000 |
| O       | 4.866478000  | 2.227647000  | 3.688334000  |

|         |              |              |              |
|---------|--------------|--------------|--------------|
| H       | 4.910483000  | 1.850451000  | 2.820811000  |
| H       | 4.040860000  | 2.690599000  | 3.717319000  |
| coord_3 |              |              |              |
| C       | 3.168491000  | -1.042379000 | 0.094685000  |
| C       | 3.140858000  | 0.378470000  | 0.003005000  |
| C       | 1.970518000  | 1.099951000  | -0.192368000 |
| C       | 0.777381000  | -0.998927000 | -0.247283000 |
| C       | 1.926494000  | -1.728384000 | -0.061638000 |
| C       | 4.482012000  | -1.552808000 | 0.287885000  |
| C       | 5.440521000  | -0.578429000 | 0.345648000  |
| N       | 0.760794000  | 0.392553000  | -0.250829000 |
| H       | -0.168524000 | -1.479399000 | -0.389475000 |
| H       | 1.871556000  | -2.800008000 | -0.057708000 |
| H       | 4.705284000  | -2.598126000 | 0.381280000  |
| H       | 6.493436000  | -0.700365000 | 0.487969000  |
| S       | 2.009441000  | 2.851501000  | -0.364276000 |
| S       | 4.772544000  | 1.038920000  | 0.159440000  |
| C       | -0.545346000 | 1.059358000  | -0.158186000 |
| O       | -1.356149000 | 0.755425000  | -1.299490000 |
| C       | -1.356200000 | 0.651746000  | 1.050884000  |
| H       | -0.442908000 | 2.143752000  | -0.139418000 |
| C       | -2.729499000 | 0.767973000  | -0.884176000 |
| C       | -2.730837000 | 1.048074000  | 0.609419000  |
| H       | -1.036741000 | 1.154414000  | 1.967836000  |
| H       | -1.324998000 | -0.425080000 | 1.237352000  |
| H       | -3.224129000 | 1.594356000  | -1.399686000 |
| H       | -2.857412000 | 2.121587000  | 0.772530000  |
| C       | -3.405859000 | -0.530533000 | -1.318635000 |
| H       | -4.477305000 | -0.495589000 | -1.107243000 |
| H       | -3.268813000 | -0.691479000 | -2.391169000 |
| O       | -2.863008000 | -1.662942000 | -0.650766000 |
| H       | -2.835098000 | -1.437611000 | 0.294519000  |
| O       | -3.753378000 | 0.363768000  | 1.322699000  |
| H       | -3.553111000 | 0.476091000  | 2.267237000  |
| O       | 3.763415000  | 5.587584000  | -1.924790000 |
| H       | 3.482225000  | 4.759675000  | -2.290325000 |
| H       | 4.649568000  | 5.459544000  | -1.614220000 |
| O       | 4.857370000  | 2.225631000  | 3.684481000  |
| H       | 4.904069000  | 1.873626000  | 2.806574000  |
| H       | 4.036954000  | 2.697060000  | 3.722962000  |
| coord_4 |              |              |              |
| C       | 3.168731000  | -1.042423000 | 0.090183000  |

|         |              |              |              |
|---------|--------------|--------------|--------------|
| C       | 3.143723000  | 0.373422000  | 0.000048000  |
| C       | 1.964522000  | 1.103283000  | -0.195115000 |
| C       | 0.773273000  | -0.995008000 | -0.245699000 |
| C       | 1.930620000  | -1.731474000 | -0.059882000 |
| C       | 4.485391000  | -1.554390000 | 0.284172000  |
| C       | 5.440401000  | -0.579679000 | 0.342493000  |
| N       | 0.762488000  | 0.391589000  | -0.253757000 |
| H       | -0.173042000 | -1.475413000 | -0.383695000 |
| H       | 1.874261000  | -2.802732000 | -0.051869000 |
| H       | 4.708423000  | -2.599680000 | 0.377803000  |
| H       | 6.493538000  | -0.700391000 | 0.484839000  |
| S       | 2.005818000  | 2.846780000  | -0.360791000 |
| S       | 4.771497000  | 1.035539000  | 0.156150000  |
| C       | -0.545306000 | 1.057754000  | -0.164575000 |
| O       | -1.356198000 | 0.748823000  | -1.304639000 |
| C       | -1.356352000 | 0.655630000  | 1.046404000  |
| H       | -0.445320000 | 2.142434000  | -0.150744000 |
| C       | -2.729586000 | 0.763651000  | -0.889504000 |
| C       | -2.731261000 | 1.048853000  | 0.603136000  |
| H       | -1.037420000 | 1.163155000  | 1.960820000  |
| H       | -1.324800000 | -0.420106000 | 1.238664000  |
| H       | -3.223536000 | 1.588678000  | -1.407749000 |
| H       | -2.859006000 | 2.122753000  | 0.762658000  |
| C       | -3.406807000 | -0.535687000 | -1.319990000 |
| H       | -4.478130000 | -0.499669000 | -1.108246000 |
| H       | -3.270319000 | -0.699684000 | -2.392138000 |
| O       | -2.864205000 | -1.666426000 | -0.649143000 |
| H       | -2.835980000 | -1.438485000 | 0.295502000  |
| O       | -3.753111000 | 0.365864000  | 1.318687000  |
| H       | -3.551417000 | 0.479114000  | 2.262811000  |
| O       | 3.775655000  | 5.601337000  | -1.927464000 |
| H       | 3.462525000  | 4.758086000  | -2.225781000 |
| H       | 4.658816000  | 5.471881000  | -1.609053000 |
| O       | 4.848262000  | 2.223615000  | 3.680628000  |
| H       | 4.897627000  | 1.897205000  | 2.793031000  |
| H       | 4.033226000  | 2.703431000  | 3.728607000  |
| coord_5 |              |              |              |
| C       | 3.168971000  | -1.042468000 | 0.085682000  |
| C       | 3.146588000  | 0.368374000  | -0.002910000 |
| C       | 1.958527000  | 1.106616000  | -0.197862000 |
| C       | 0.769164000  | -0.991090000 | -0.244115000 |
| C       | 1.934745000  | -1.734565000 | -0.058126000 |

|         |              |              |              |
|---------|--------------|--------------|--------------|
| C       | 4.488770000  | -1.555971000 | 0.280459000  |
| C       | 5.440282000  | -0.580930000 | 0.339337000  |
| N       | 0.764182000  | 0.390626000  | -0.256684000 |
| H       | -0.177545000 | -1.471432000 | -0.377909000 |
| H       | 1.876988000  | -2.805442000 | -0.046028000 |
| H       | 4.711561000  | -2.601232000 | 0.374322000  |
| H       | 6.493627000  | -0.700485000 | 0.481744000  |
| S       | 2.002195000  | 2.842060000  | -0.357307000 |
| S       | 4.770451000  | 1.032159000  | 0.152859000  |
| C       | -0.545266000 | 1.056152000  | -0.170964000 |
| O       | -1.356249000 | 0.742222000  | -1.309780000 |
| C       | -1.356503000 | 0.659512000  | 1.041927000  |
| H       | -0.447735000 | 2.141108000  | -0.162070000 |
| C       | -2.729672000 | 0.759330000  | -0.894833000 |
| C       | -2.731683000 | 1.049635000  | 0.596853000  |
| H       | -1.038103000 | 1.171893000  | 1.953794000  |
| H       | -1.324607000 | -0.415121000 | 1.239977000  |
| H       | -3.222944000 | 1.582998000  | -1.415810000 |
| H       | -2.860597000 | 2.123915000  | 0.752787000  |
| C       | -3.407753000 | -0.540840000 | -1.321347000 |
| H       | -4.478955000 | -0.503749000 | -1.109249000 |
| H       | -3.271828000 | -0.707888000 | -2.393105000 |
| O       | -2.865404000 | -1.669907000 | -0.647519000 |
| H       | -2.836860000 | -1.439359000 | 0.296481000  |
| O       | -3.752841000 | 0.367963000  | 1.314674000  |
| H       | -3.549722000 | 0.482136000  | 2.258382000  |
| O       | 3.787896000  | 5.615090000  | -1.930137000 |
| H       | 3.444227000  | 4.761767000  | -2.157838000 |
| H       | 4.667991000  | 5.484227000  | -1.603910000 |
| O       | 4.839154000  | 2.221599000  | 3.676775000  |
| H       | 4.891151000  | 1.921127000  | 2.780214000  |
| H       | 4.029674000  | 2.709705000  | 3.734248000  |
| coord_6 |              |              |              |
| C       | 3.169211000  | -1.042512000 | 0.081181000  |
| C       | 3.149454000  | 0.363326000  | -0.005867000 |
| C       | 1.952532000  | 1.109948000  | -0.200609000 |
| C       | 0.765055000  | -0.987171000 | -0.242530000 |
| C       | 1.938870000  | -1.737656000 | -0.056370000 |
| C       | 4.492149000  | -1.557552000 | 0.276746000  |
| C       | 5.440162000  | -0.582180000 | 0.336182000  |
| N       | 0.765877000  | 0.389663000  | -0.259611000 |
| H       | -0.182044000 | -1.467448000 | -0.372119000 |



|   |              |              |              |
|---|--------------|--------------|--------------|
| H | 1.879747000  | -2.808144000 | -0.040193000 |
| H | 4.714700000  | -2.602787000 | 0.370834000  |
| H | 6.493721000  | -0.700555000 | 0.478623000  |
| S | 1.998571000  | 2.837339000  | -0.353823000 |
| S | 4.769404000  | 1.028778000  | 0.149569000  |
| C | -0.545227000 | 1.054551000  | -0.177354000 |
| O | -1.356302000 | 0.735623000  | -1.314912000 |
| C | -1.356653000 | 0.663392000  | 1.037452000  |
| H | -0.450149000 | 2.139771000  | -0.173397000 |
| C | -2.729759000 | 0.755008000  | -0.900160000 |
| C | -2.732105000 | 1.050418000  | 0.590570000  |
| H | -1.038791000 | 1.180628000  | 1.946759000  |
| H | -1.324414000 | -0.410124000 | 1.241289000  |
| H | -3.222351000 | 1.577313000  | -1.423870000 |
| H | -2.862189000 | 2.125073000  | 0.742916000  |
| C | -3.408697000 | -0.545993000 | -1.322704000 |
| H | -4.479778000 | -0.507830000 | -1.110252000 |
| H | -3.273337000 | -0.716090000 | -2.394070000 |
| O | -2.866606000 | -1.673383000 | -0.645891000 |
| H | -2.837742000 | -1.440234000 | 0.297455000  |
| O | -3.752568000 | 0.370063000  | 1.310662000  |
| H | -3.548029000 | 0.485156000  | 2.253953000  |
| O | 3.800137000  | 5.628844000  | -1.932811000 |
| H | 3.428024000  | 4.771158000  | -2.087805000 |
| H | 4.677095000  | 5.496583000  | -1.598792000 |
| O | 4.830047000  | 2.219584000  | 3.672922000  |
| H | 4.884632000  | 1.945328000  | 2.768150000  |
| H | 4.026294000  | 2.715878000  | 3.739879000  |

coord\_7

|   |              |              |              |
|---|--------------|--------------|--------------|
| C | 3.169451000  | -1.042556000 | 0.076679000  |
| C | 3.152319000  | 0.358279000  | -0.008824000 |
| C | 1.946536000  | 1.113281000  | -0.203356000 |
| C | 0.760946000  | -0.983253000 | -0.240946000 |
| C | 1.942996000  | -1.740746000 | -0.054613000 |
| C | 4.495527000  | -1.559133000 | 0.273033000  |
| C | 5.440042000  | -0.583430000 | 0.333027000  |
| N | 0.767571000  | 0.388700000  | -0.262538000 |
| H | -0.186538000 | -1.463457000 | -0.366330000 |
| H | 1.882539000  | -2.810836000 | -0.034351000 |
| H | 4.717834000  | -2.604345000 | 0.367339000  |
| H | 6.493812000  | -0.700633000 | 0.475502000  |
| S | 1.994948000  | 2.832619000  | -0.350338000 |

|         |              |              |              |
|---------|--------------|--------------|--------------|
| S       | 4.768358000  | 1.025398000  | 0.146278000  |
| C       | -0.545191000 | 1.052953000  | -0.183743000 |
| O       | -1.356358000 | 0.729028000  | -1.320036000 |
| C       | -1.356801000 | 0.667271000  | 1.032980000  |
| H       | -0.452565000 | 2.138425000  | -0.184726000 |
| C       | -2.729848000 | 0.750685000  | -0.905487000 |
| C       | -2.732527000 | 1.051202000  | 0.584285000  |
| H       | -1.039481000 | 1.189358000  | 1.939714000  |
| H       | -1.324224000 | -0.405115000 | 1.242601000  |
| H       | -3.221757000 | 1.571626000  | -1.431928000 |
| H       | -2.863779000 | 2.126225000  | 0.733045000  |
| C       | -3.409639000 | -0.551146000 | -1.324061000 |
| H       | -4.480602000 | -0.511910000 | -1.111255000 |
| H       | -3.274846000 | -0.724292000 | -2.395030000 |
| O       | -2.867807000 | -1.676856000 | -0.644261000 |
| H       | -2.838623000 | -1.441110000 | 0.298425000  |
| O       | -3.752295000 | 0.372165000  | 1.306650000  |
| H       | -3.546335000 | 0.488176000  | 2.249522000  |
| O       | 3.812378000  | 5.642597000  | -1.935485000 |
| H       | 3.414498000  | 4.786361000  | -2.017148000 |
| H       | 4.686127000  | 5.508950000  | -1.593701000 |
| O       | 4.820939000  | 2.217568000  | 3.669070000  |
| H       | 4.878066000  | 1.969742000  | 2.756859000  |
| H       | 4.023084000  | 2.721944000  | 3.745493000  |
| coord_8 |              |              |              |
| C       | 3.169691000  | -1.042601000 | 0.072178000  |
| C       | 3.155184000  | 0.353231000  | -0.011781000 |
| C       | 1.940541000  | 1.116613000  | -0.206103000 |
| C       | 0.756837000  | -0.979335000 | -0.239361000 |
| C       | 1.947121000  | -1.743837000 | -0.052857000 |
| C       | 4.498906000  | -1.560715000 | 0.269321000  |
| C       | 5.439922000  | -0.584681000 | 0.329872000  |
| N       | 0.769265000  | 0.387737000  | -0.265466000 |
| H       | -0.189464000 | -1.463642000 | -0.362212000 |
| H       | 1.882085000  | -2.814412000 | -0.031841000 |
| H       | 4.722468000  | -2.605575000 | 0.363827000  |
| H       | 6.494224000  | -0.694953000 | 0.472138000  |
| S       | 1.991325000  | 2.827898000  | -0.346854000 |
| S       | 4.767311000  | 1.022017000  | 0.142988000  |
| C       | -0.545156000 | 1.051356000  | -0.190134000 |
| O       | -1.356415000 | 0.722438000  | -1.325151000 |
| C       | -1.356949000 | 0.671149000  | 1.028511000  |

|         |              |              |              |
|---------|--------------|--------------|--------------|
| H       | -0.454981000 | 2.137071000  | -0.196056000 |
| C       | -2.729938000 | 0.746363000  | -0.910813000 |
| C       | -2.732947000 | 1.051986000  | 0.577998000  |
| H       | -1.040174000 | 1.198082000  | 1.932660000  |
| H       | -1.324035000 | -0.400094000 | 1.243911000  |
| H       | -3.221161000 | 1.565936000  | -1.439983000 |
| H       | -2.865368000 | 2.127373000  | 0.723173000  |
| C       | -3.410581000 | -0.556297000 | -1.325418000 |
| H       | -4.481425000 | -0.515990000 | -1.112259000 |
| H       | -3.276357000 | -0.732492000 | -2.395988000 |
| O       | -2.869011000 | -1.680323000 | -0.642628000 |
| H       | -2.839505000 | -1.441987000 | 0.299391000  |
| O       | -3.752020000 | 0.374269000  | 1.302638000  |
| H       | -3.544641000 | 0.491197000  | 2.245088000  |
| O       | 3.824619000  | 5.656350000  | -1.938158000 |
| H       | 3.404061000  | 4.807137000  | -1.947345000 |
| H       | 4.695091000  | 5.521328000  | -1.588639000 |
| O       | 4.811831000  | 2.215552000  | 3.665217000  |
| H       | 4.871445000  | 1.994299000  | 2.746357000  |
| H       | 4.020038000  | 2.727898000  | 3.751085000  |
| coord_9 |              |              |              |
| C       | 3.169930000  | -1.042645000 | 0.067676000  |
| C       | 3.158050000  | 0.348183000  | -0.014738000 |
| C       | 1.934546000  | 1.119946000  | -0.208850000 |
| C       | 0.752728000  | -0.975416000 | -0.237777000 |
| C       | 1.951247000  | -1.746927000 | -0.051101000 |
| C       | 4.502285000  | -1.562296000 | 0.265607000  |
| C       | 5.439802000  | -0.585931000 | 0.326717000  |
| N       | 0.770960000  | 0.386773000  | -0.268393000 |
| H       | -0.192729000 | -1.461627000 | -0.358760000 |
| H       | 1.884867000  | -2.817048000 | -0.030013000 |
| H       | 4.726711000  | -2.606912000 | 0.360045000  |
| H       | 6.494680000  | -0.692950000 | 0.468911000  |
| S       | 1.987702000  | 2.823178000  | -0.343370000 |
| S       | 4.766265000  | 1.018636000  | 0.139697000  |
| C       | -0.545122000 | 1.049753000  | -0.196528000 |
| O       | -1.356477000 | 0.715847000  | -1.330257000 |
| C       | -1.357099000 | 0.675025000  | 1.024045000  |
| H       | -0.457398000 | 2.135707000  | -0.207387000 |
| C       | -2.730027000 | 0.742039000  | -0.916145000 |
| C       | -2.733367000 | 1.052771000  | 0.571714000  |
| H       | -1.040868000 | 1.206801000  | 1.925597000  |

|          |              |              |              |
|----------|--------------|--------------|--------------|
| H        | -1.323851000 | -0.395068000 | 1.245222000  |
| H        | -3.220563000 | 1.560244000  | -1.448037000 |
| H        | -2.866957000 | 2.128518000  | 0.713301000  |
| C        | -3.411521000 | -0.561446000 | -1.326773000 |
| H        | -4.482248000 | -0.520067000 | -1.113262000 |
| H        | -3.277867000 | -0.740692000 | -2.396943000 |
| O        | -2.870217000 | -1.683787000 | -0.640992000 |
| H        | -2.840386000 | -1.442862000 | 0.300354000  |
| O        | -3.751743000 | 0.376377000  | 1.298625000  |
| H        | -3.542947000 | 0.494218000  | 2.240655000  |
| O        | 3.836859000  | 5.670103000  | -1.940832000 |
| H        | 3.396929000  | 4.832938000  | -1.879746000 |
| H        | 4.703984000  | 5.533718000  | -1.583608000 |
| O        | 4.802723000  | 2.213536000  | 3.661364000  |
| H        | 4.864763000  | 2.018931000  | 2.736654000  |
| H        | 4.017152000  | 2.733736000  | 3.756650000  |
| coord_10 |              |              |              |
| C        | 3.169551000  | -1.043074000 | 0.062706000  |
| C        | 3.160334000  | 0.342746000  | -0.018246000 |
| C        | 1.927992000  | 1.122911000  | -0.212200000 |
| C        | 0.748004000  | -0.971834000 | -0.236676000 |
| C        | 1.954734000  | -1.750376000 | -0.049776000 |
| C        | 4.505029000  | -1.564287000 | 0.261463000  |
| C        | 5.439074000  | -0.587613000 | 0.323076000  |
| N        | 0.772076000  | 0.385471000  | -0.271884000 |
| H        | -0.201523000 | -1.448892000 | -0.348774000 |
| H        | 1.892959000  | -2.818335000 | -0.015601000 |
| H        | 4.725482000  | -2.609681000 | 0.356426000  |
| H        | 6.493489000  | -0.705310000 | 0.465882000  |
| S        | 1.983567000  | 2.818080000  | -0.340589000 |
| S        | 4.764655000  | 1.014831000  | 0.135823000  |
| C        | -0.545684000 | 1.047995000  | -0.203482000 |
| O        | -1.357066000 | 0.708988000  | -1.335983000 |
| C        | -1.357752000 | 0.678684000  | 1.018974000  |
| H        | -0.460332000 | 2.134041000  | -0.219387000 |
| C        | -2.730696000 | 0.737439000  | -0.921973000 |
| C        | -2.734360000 | 1.053373000  | 0.564742000  |
| H        | -1.042142000 | 1.215372000  | 1.917918000  |
| H        | -1.324224000 | -0.390133000 | 1.245955000  |
| H        | -3.220526000 | 1.554217000  | -1.456740000 |
| H        | -2.869088000 | 2.129446000  | 0.702734000  |
| C        | -3.413025000 | -0.566927000 | -1.328699000 |

|   |              |              |              |
|---|--------------|--------------|--------------|
| H | -4.483663000 | -0.524429000 | -1.114800000 |
| H | -3.279981000 | -0.749261000 | -2.398401000 |
| O | -2.872029000 | -1.687514000 | -0.639816000 |
| H | -2.841905000 | -1.443981000 | 0.300818000  |
| O | -3.752050000 | 0.378337000  | 1.294044000  |
| H | -3.541850000 | 0.497135000  | 2.235598000  |
| O | 3.848674000  | 5.683332000  | -1.944371000 |
| H | 3.392877000  | 4.862869000  | -1.816333000 |
| H | 4.712110000  | 5.545635000  | -1.579576000 |
| O | 4.793069000  | 2.211304000  | 3.656855000  |
| H | 4.857548000  | 2.043092000  | 2.725969000  |
| H | 4.013669000  | 2.739415000  | 3.761519000  |
